# Supplementary material for: Outcomes and safety of colonoscopy in elderly patients aged 80 years and older: a retrospective cohort study
Source: PeerJ. 2025 Nov 19;13:e20404. doi: 10.7717/peerj.20404 (PMC12640131; doi:10.7717/peerj.20404)
Supplement: Supplemental Information 2 — Ages, genders, comorbidities, colonoscopy reports and pathological information, etc. [file peerj-13-20404-s002.xlsx]

## Sheet: Sheet1
IDX	Gender	Age	Admission number	Outpatient number	Report time	smoking	Drinking alcohol	Family history of bowel cancer	Hyperlipidemia	Cholesterol	Triglycerides	LDL	hypertension	Coronary heart disease	diabetes	Glycosylated hemoglobin	Height (cm)	Weight (kg)	BMI	ASA classification	History of aspirin use	Indications for colonoscopy	Complications	Whether or not they died within 30 days	Check the site	Examination Conclusions	Check the room	Final diagnosis	Type of operation	Pathological findings	Findings on examination	Polyps 1	Polyp 1 Pathology	Polyp 2	Polyp 2 Pathology	Polyp 3	Polyp 3 Pathology	Polyp 4	Polyp 4 Pathology	Polyp 5	Polyp 5 Pathology	Lens entry time	Intestinal cleanliness	Whether a full colonoscopy has been completed
1	male	80	1137999		2021-05-24 09:03:00	Never smoked	Never drank alcohol	no	have	4.92	4.84	1.68	have	no	have		164	65		II	Currently taking	Follow-up for history of colon cancer/polyps	No complications	Survival	Colonoscopy (painless)	No abnormalities were found in the colonic mucosa	Endoscopy room 3		Examination	no	Lens entry time: 4 Intestinal cleanliness grade 4 A large amount of fecal water and feces were found in the intestinal cavity after entering the endoscope, and the mucosal examination was not satisfactory. The colonic mucosa was smooth, the vascular texture was clear, and the plica of semilunar was intact, without erosion, ulceration and neoplasms											4	4	yes
2	female	80	1102695		2021-09-17 15:37:00	Never smoked	Never drank alcohol	no	have	3.83	1.09	2.08	have	have	no	6	159	67		II	Used intermittently	hematochezia			Colonoscopy (painless)	Multiple polyps in the colon Forceps clear 2 6 pieces were removed cold	Endoscopy room 1		Treatment	7 bottles: all are tubular adenomas	Time of entering the endoscope: 7 Intestinal cleanliness grade 2 There was no obvious abnormality in the mucosa of the terminal ileum. The ileocecal valve was lip-shaped, the opening of the appendix was clear, there was no erosion, ulcer and neoplasm. An Is polyp was seen in the cecum, the size was about 0.3cm*0.3cm, the surface was smooth, and the color was the same as the surrounding. Seven ISP…	7.	Tubular adenoma									7	2	yes
3	female	80	1098349		2021-08-06 12:07:00	Never smoked	Never drank alcohol	no	no	3.49	0.81	1.67	have	no	have	6.7	156	75		II	Never used before.	Abdominal pain or distension			Colonoscopy (painless)	Colon polyps Cold excision and forceps	Endoscopy Room 2		Treatment (EMR)	Tubular adenoma (descending colon), low grade (sigmoid colon) chronic inflammation of the polypoid intestinal mucosa	Entry time: 5. Intestinal cleanliness grade 2 The ileocecal valve was lip-shaped and the opening of the appendix was clear without erosion or ulceration or neoplasm. A polyp of Yamada type I, 0.6cm in size, with smooth surface mucosa was found in the descending colon. After cold resection, a polyp of Yamada type I, 0.4cm in size, and smooth surface mucosa was found in the sigmoid colon. The remai…	Descending colon	Tubular adenoma	Sigmoid colon	Chronic mucositis							5	2	yes
4	male	80	1098233		2021-09-28 11:40:00	Never smoked	Never drank alcohol	no	have	4.76	0.6	2.79	have	no	no		170	57		II	Currently taking	Change in bowel habits			Colonoscopy (painless)	Multiple polyps in the colon A bulge at the mouth of the appendix	Endoscopy Room 4		Examination	Sigmoid: hyperplastic adenoma mixed polyp, descending B junction: tubular adenoma, straight B junction: chronic inflammation of mucosa	Time of endoscopy entry: 5 Intestinal cleanliness grade 3 The ileocecal valve was lip-shaped, the opening of the appendix was clear, and a hemispherical eminence with a diameter of 0.8cm was found in the orifice of the appendix. There were two polyps with a diameter of 0.8cm and 0.5cm on the surface of the mucosa and the surrounding straight B junction, respectively. After admission and treatment…	Sigmoid colon	Adenoma	Descending B junction	Adenoma							5	3	yes
5	female	80	1098195		2019-11-06 09:59:00	Never smoked	Never drank alcohol	no	have	4.78	1.06	2.4	have	no	no	5.6	162	56		II	Currently taking	Change in bowel habits			Colonoscopy (general)	No abnormalities were found in the colonic mucosa	Endoscopy room 5		Examination	no	Entry time: 6 Intestinal cleanliness grade 4 The ileocecal valve was lip-shaped, the opening of the appendix was clear, and there was no erosion and ulcer or neoplasm. There was a lot of fecal water and formed fecal mass in the intestine, and the local mucosa was affected											6	4	yes
6	female	80	1094565		2021-04-23 14:16:00	Never smoked	Never drank alcohol	no	no	2.84	0.85	1.94	have	no	no		160	57.5		IV	Never used before.	Abdominal pain or distension			Colonoscopy (general)	Sigmoid colon cancer Stricture of the colon Colonic stenting via electronic endoscopy Colonic polyps	ERCP	Colon cancer T4AaN0MX	Treatment (Stent placement)	The background is mostly villous tubular adenoma with ulceration, focal high-grade intraepithelial neoplasia, and a small amount of mucinous adenocarcinoma (a large amount of extracellular mucus, a few scattered signet ring mucus cells). Please consider the clinical and endoscopic findings Immunohistochemical results: MLH1 (+), MSH2 (+), MSH6 (+), PMS2 (+), P53 (mutant), Her-2 (2+), Ki-67 (60%+),…	Bowel cleanliness grade 3 An Isp polyp, about 1.0x1.0cm in size, with surface lobe and red color, was found about 20cm into the endoscopic cavity. The sigmoid colon mass was found about 30cm into the endoscopic cavity, and the lumen was narrow. The endoscopy could not pass through the biopsy. After inserting the catheter along the guide wire to the distal end of the stenosis, 30mL of contrast age…	Sigmoid colon	Adenocarcinoma	Sigmoid colon	Adenoma							Failure	3	Intestinal obstruction
7	female	80	1085735		2020-10-23 15:46:00	Never smoked	Never drank alcohol	no	have	2.93	1.15	1.41	have	have	no	4.6	150	53		II	Used intermittently	anemia			Colonoscopy (painless)	Colon cancer Multiple polyps in the colon	Endoscopy room 5	Colon cancer	Examination	Metaplastic adenocarcinoma (ascending colon near ileocecum) (Ascending colon) tubular adenoma, low grade (Sigmoid) tubular adenoma, low grade	Time of endoscopy entry: 7 Intestinal cleanliness grade 2: There was more fecal water in the intestinal cavity, and the affected part of the mucosa was observed The ileocecal valve was lip-shaped and the opening of the appendix was clear. There was no erosion and ulcer or new growth. A 3*2cm elevated mass was found near the ileocecal junction of the ascending colon, which was 1/2 circular. The su…	l	Adenocarcinoma	Liter 1.5	Tubular adenoma	Sigmoid 1.5	Tubular adenoma					7	2	yes
8	male	80	1085105		2020-10-16 14:57:00	Never smoked	Never drank alcohol	no	have	4.63	1.63	3.1	have	have	no	5.9	174	64		III	Used intermittently	Abdominal pain or distension			Colonoscopy (painless)	Cecal cancer - High probability of malignancy Multiple polyps of colon - 1 clamp net Melanosis of colon Poor bowel preparation	Endoscopy room 1	Tubular adenocarcinoma, metaplasia, P53 missense mutation, pT3N0Mx	Examination	(Cecal) tubular adenocarcinoma, immunohistochemical results: SATB2 (+), MLH1 (+), MSH2 (+), MSH6 (+), PMS2 (+), HER-2 (-), Ki-67 (80%+), P53 (missense mutation) (rectal) tubular adenoma, low-grade melanosis	Entry time: 11 intestinal cleanliness grade 4, local grade 5 An ulcerated infiltrative lesion was found in the cecum, involving the cecum and the lower lip of the ileocecal flap. The center of the lesion was covered with dirty moss, and the surrounding nodule was uneven. The structure of the crisper cecum and appendix orifice disappeared, local deformation was obvious, intestinal peristalsis disa…	Cecum	Adenocarcinoma	Rectum	Adenoma	Hepatic flexure 1cm						11	5	yes
9	male	80	1083877		2020-09-16 17:03:00	Never smoked	Never drank alcohol	no	have	5.4	1.75	3.52	no	no	have	9.2	180	85		II	Used intermittently	Change in bowel habits			Colonoscopy (painless)	Multiple polyps in the colon The nature of the colon mass is to be determined cancer	Endoscopy room 1	Rectal cancer (T3N0M0)	Examination	(rectal) adenocarcinoma	Entry time: 6 Bowel cleanliness grade 4 The lens was inserted through the cavity to the ileocecal valve by hook pulled method. After entering the lens, an IS-type polyp was seen about 70cm from the ascending colon to the anus, with smooth surface and same color as the surrounding. There was no erosion in the rectum, about 7cm from the anus, there was an Isp polyp, about 1.0cmx0.8cm in size, the s…	Rectum	Adenocarcinoma	There were 3 polyps, the largest being 1cm								6	4	yes
10	female	80	1078967		2020-05-12 13:23:00	Never smoked	Never drank alcohol	no	have	4.45	2.73	2.71	have	no	no	6.1	162	70		III	Currently taking	hematochezia			Colonoscopy (painless)	Colonic polyps Clamp net Melanosis of colon	Painless preparation room		Examination	Melanosis (transverse colon)	Entry time: 4 Intestinal cleanliness grade 3 The endoscope was inserted through the cavity to the end of the ileum, and the endoscope was successfully inserted into the transverse colon and about 55cm from the anus, with a size of 0.2cmx0.4cm. The surface was smooth, the color was the same as the surrounding, and there was no erosion											4	3	yes
11	female	80	1075842		2020-01-16 13:41:00	Never smoked	Never drank alcohol	no	have	7.48	2	5.09	no	no	no		160	70		II	Never used before.	Abdominal pain or distension			Colonoscopy (painless)	No abnormalities were found in the whole colonic mucosa	Endoscopy room 3		Examination	no	Entry time: 5 Intestinal cleanliness grade 3 The endoscope was inserted 80cm through the lumen to the end of the ileum. The ileocecal valve was lip-shaped, the opening of the appendix was clear, and no erosion or ulcer or neoplasm was observed											5	3	yes
12	female	80	1075188		2020-01-07 12:18:00	Never smoked	Never drank alcohol	no	no				have	no	no		146	62		II		Change in bowel habits			Colonoscopy (painless)	Multiple polyps in colon, forceps clear 3 Endoscopic hemostasis and management Rectal LST (poor bowel cleanliness)	Endoscopy room 5		Examination	(hepatic flexure) tubular adenoma, low-grade (hepatic flexure) tubular adenoma, low grade (transverse colon) tubular adenoma, low grade (Rectum) villous tubular adenoma	Entry time: 6 intestinal cleanliness grade 4 There was no obvious abnormality in the ileum at the end of the endoscope. The ileocecal valve was lip-shaped, the opening of the appendix was clear, and there was no erosion and ulcer or new growth in the intestinal cavity. Two 0.4cm IS-ISP polyps were found in the hepatic flexure, with smooth surface and similar color. The biopsy texture was soft and…	Hepatic flexure	Tubular adenoma	Hepatic flexure	Tubular adenoma	cross	Tubular adenoma	Rectum	Villous tubular adenoma			6	4	yes
13	male	80	1074658		2021-09-10 13:26:00	Never smoked	Never drank alcohol	no	have	5.344	1.79	3.5	have	have	no		170	65		III	Currently taking	Positive fecal occult blood			Colonoscopy (painless)	Colonic polyps Clamp net Endoscopic hemostasis and disposal Melanosis of colon	Endoscopy Room 4		Examination	(transverse colon) tubular adenoma, low-grade melanosis	Entry time: 2 Bowel cleanliness grade 1 A small amount of bleeding was observed in the clean wound with biopsy forceps. The wound was closed with tissue clip. After washing, the whole colon showed brown changes without active bleeding, and the rest of the colon showed no obvious abnormalities	cross	Tubular adenoma									2	1	yes
14	female	80	1074558		2019-12-26 12:09:00	Never smoked	Never drank alcohol	no	have	4.53	2.18	2.38	have	no	no		156	57		II	Never used before.	hematochezia			Colonoscopy (painless)	Poor bowel preparation Internal hemorrhoids	Endoscopy room 5		Examination	no	Enter the lens to 40cm (descending B junction?) A large amount of solid stool blocked the intestinal lumen, and the mucosa was smooth, the vascular texture was clear, the plica of semilunar meniscus was intact, there was no erosion, ulcer and neoplasm, internal hemorrhoids, and local punctate redness											Failure	5	Poor bowel preparation prevented completion.
15	male	80	1069089		2018-01-03 12:23:00	Smoking now	Are drinking alcohol	no	have	5.3	1.74	3.53	have	no	have		173	65		III	Used intermittently	Follow-up for history of colon cancer/polyps			Colonoscopy (painless)	For multiple polyps in the colon, clamp 1 clean	Endoscopy room 10		Examination	(Hepatic flexure) tubular adenoma, low grade	Lens entry time: 6 intestinal cleansing Degree 3-4 The endoscope was inserted 100cm through the cavity to the cecum by hook pull method. The ileocecal valve was lip-shaped and the opening of the appendix was clear. There was no erosion and ulceration or new growth. One Yamada type I polyp, about 0.4cm in size, was found in the hepatic flexure, with smooth surface and similar color. The biopsy was…	Hepatic flexure	Tubular adenoma	Three polyps were found								6	4	yes
16	female	80	1067421		2019-07-15 09:34:00	Smoking now	Never drank alcohol	no	no	4.41	1.64	2.55	no	no	no		164	48		II	Never used before.	Abdominal pain or distension			Colonoscopy (painless)	Multiple colonic polyps (LST) 2 LSTS were clipped and the rest were left for further treatment Colonic diverticulum Melanosis of colon	Endoscopy Room 2		Examination	(Appendix ostium) hyperplastic polyps, melanosis Tubular adenoma (sigmoid colon), low grade	Entry time: 4 Bowel cleanliness grade 2 The endoscope was inserted through the cavity to the end of the ileum by hook method, and an IS-like polyp (0.4cmx0.4cm in size) with smooth surface and similar color was found at the appendiceal orifice without erosion. A diverticulum (0.3x0.5cm in size) was found in the ascending colon without erosion or bleeding, and a discoid LST was found above the ile…	Ostium of appendix	Hyperplastic polyps	Sigmoid colon	Tubular adenoma	Liter 1.2		Horizontal 2.0				4	2	yes
17	male	80	1064689		2019-07-22 16:54:00	Smoking now	Are drinking alcohol	no	no	4.32	1.25	2.83	no	no	no		162	63.5		II	Never used before.	anemia			Colonoscopy (painless)	Knot Multiple intestinal polyps Two were clipped and the rest were resected by electrotomy Poor bowel preparation	Endoscopy room 3		Examination	Chronic inflammation of the polypoid intestinal mucosa (transverse colon) Tubular adenoma (transverse colon), low grade	Entry time: 5 Bowel cleanliness grade 5 The hook-pull method was used to enter the scope 80cm through the lumen to the end of the ileum. The ileocecal valve was lip-shaped and the appendix opening was clear Two small polyps, 0.3cm in diameter, with a smooth surface and the same color as the surrounding, were found in the transverse colon. The biopsy forceps were clear on the transverse node There…	cross	Tubular adenoma	cross	Chronic mucositis							5	5	yes
18	female	80	1060194		2019-05-13 14:52:00	Never smoked	Never drank alcohol	no	have	5.22	0.84	3.05	no	no	no	6.3	170	60		III	Never used before.	Change in bowel habits			Colonoscopy (general)	Melanosis of colon Rectal scar	Endoscopy room 5		Examination	no	Anal examination was negative, and the time of endoscope entry was 7 There was more fecal water in the intestinal cavity of grade 3-4, which affected the observation There was no abnormal ileocecal valve lip-shaped at the end of the ileum, the opening of the appendix was clear, no erosion and ulceration or new growth was observed. The colon mucosa was smooth, the vascular texture was clear, the p…											#VALUE!	4	yes
19	male	80	1057895		2019-04-04 14:47:00	Never drank alcohol	Never drank alcohol	no	no	3.48	0.4	1.21	have	have	no		178	73			Currently taking	Follow-up for history of colon cancer/polyps			Colonoscopy (general)	after right hemicolectomy	Endoscopy room 1		Examination	no	Entry time: 6 intestinal Cleanliness grade 2 The colonic mucosa was smooth, the vascular texture was clear, the semilunar fold was intact, and there was no erosion, ulcer and neoplasm											6	2	yes
20	male	80	1057663		2019-03-25 15:57:00	Never smoked	Never drank alcohol	no	no	4.89	1.62	2.74	have	no	have	6.6					Never used before.	Abdominal pain or distension			Colonoscopy (painless)	No abnormalities were found in the whole colonic mucosa	Endoscopy room 1		Examination	no	Lens entry time: 6 intestinal clearance Cleanliness grade 1 The ileocecal valve was lip-shaped, the opening of the appendix was clear, and no erosion or ulcer or neoplasm was observed. The colonic mucosa was smooth, the vascular texture was clear, and the plica of semilunaris was intact, and no erosion, ulcer or neoplasm was observed											6	1	yes
21	male	80	1056480		2019-03-04 16:28:00	Never smoked	Never drank alcohol	no	no	3.57	1.12	1.86	have	have	have	7					Currently taking	hematochezia			Colonoscopy (general)	Rectal polyp, forceps clear Internal hemorrhoids	Endoscopy room 3		Examination	(Rectal) hyperplastic polyps	Entry time: 7 Bowel cleanliness grade 3 The ileocecal valve was lip-shaped, the appendix opening was clear, and multiple diverticula were seen in the cecum. The size was 0.5-0.8cm. The colon mucosa was smooth at the bottom, the vascular texture was clear, the semilunar fold was intact, and there was no erosion, ulcer or neoplasm. The surface was smooth, the clamp was clear, and could be See inter…	Rectum	Hyperplastic polyps									7	3	yes
22	female	80	1056323		2019-03-01 11:52:00	Never smoked	Never drank alcohol	A first-degree relative over 60 years old was diagnosed with colorectal cancer.	no	3.34	1.4	2.18	have	no	no	5.8		54			Never used before.	hematochezia			Colonoscopy (general)	Multiple colon polyps Adenoma, clamp clear Rectal mass cancer	Endoscopy room 5	Colon cancer T4N0M0	Examination	1 (hepatic flexure) tubular adenoma, low grade; 2 (transverse colon) tubular adenoma, low grade; 3 (rectal) villous tubular adenoma, high grade, please combine with endoscopic findings to wait for immunohistochemical assistant diagnosis Immunohistochemical results: CK20 (+), CDX-2 (+), Ki-67 (80%+), P53 (mutant +), Her-2 (1+), MLH1 (+), MSH2 (+), MSH6 (+), PMS2 (+)	Insertion time: 6 Intestinal cleanliness 3 Grade An ISP-type polyp, about 0.4x0.5cm in size, with smooth surface and peripheral color, was found in the hepatic flexure, and an ISP-type polyp, about 0.3x0.8cm in size, with surface lobe and peripheral color, was found in the transverse colon. A semi-circular mass was found in the rectum near the anus. The longitudinal axis of the polyp was about 2.…	Hepatic flexure	Tubular adenoma	cross	Tubular adenoma	Rectum	Villous tubular adenoma, focally high-grade					6	3	yes
23	female	80	1055902		2019-02-26 12:20:00	Never smoked	Never drank alcohol	no	no	5.05	1.34	2.52	have	have	have	5.7	158	60		II	Used intermittently	Abdominal pain or distension			Colonoscopy (painless)	For multiple polyps in colon, 2 were clipped and 2 were removed by cold Hemorrhoids	Endoscopy room 1		Treatment	1 (ascending colon 1) Tubular adenoma, low grade; 2 (ascending colon 2) tubular adenoma, low grade; 3 (sigmoid colon 1) roughly normal intestinal mucosa; 4 (sigmoid colon 2) hyperplastic polyp	Entry time: 5 Bowel cleanliness grade 3 There was no obvious abnormality in the terminal ileum. The ileocecal valve was lip-shaped, the opening of the appendix was clear, no erosion and ulcer and new growth were observed. A 0.8cm Isp polyp was found in the ascending colon near the hepatic flexure, and the polyp root was ligated by snare and removed by cold surgery. One was found in the sigmoid co…	l	Tubular adenoma	l	Tubular adenoma	Sigmoid colon	Hyperplastic polyps					5	3	yes
24	male	80	1055881		2019-02-26 17:15:00	Never smoked	Never drank alcohol	no	have	3.32	1.69	1.59	have	have	no		178	96		III	Currently taking	Follow-up for history of colon cancer/polyps			Colonoscopy (general)	Descending colon LST (NG-MIX), to be ESD Melanosis of colon Perianal eminence lesion, hyperpigmentation nature to be determined	Endoscopy Room 2		Examination	Tubular adenoma (descending colon), low grade	Entry time: 8 intestinal cleansing Degree 2 The ileocecal valve was lip-shaped, the appendix opening was clear, there was no erosion, ulcer and neoplasm. 35cm from the anus, there was a LST, 2.0*2.5cm in size, ill-defined boundary, and lobulated nodules at one end of the lesion. The surface of the lesion and nodule was Type II and IIIl glandular duct opening, biopsy *1 at the nodule, soft, the re…	The descending colon was 2cm	Tubular adenoma									8	2	yes
25	male	80	1048251		2019-11-15 15:01:00	Never smoked	Are drinking alcohol	no	no	3.23	0.73	2.23	no	no	no		165	63		III	Never used before.	Follow-up for history of colon cancer/polyps			Colonoscopy (general)	Multiple polyps in colon, forceps removed Anastomotic stomatitis Rectal surgery Poor bowel preparation	Endoscopy room 8		Examination	Tubular adenoma (sigmoid colon), low grade	Entry time: 5 Bowel cleanliness grade 4-5 The ileocecal valve was lip-shaped. The opening of the appendix clearly showed the thinness of the colonic mucosa, multiple patchy erythema, mucus attachment, and easy bleeding in contact. Two IS-type polyps, about 0.4cm, were seen at the rectosigmoid junction, with smooth surface and similar color. Easy bleeding, washed with water, no active bleeding was…	Sigmoid colon	Tubular adenoma	Sigmoid colon	Tubular adenoma							5	5	yes
26	male	80	1047280		2018-10-10 16:44:00	Never smoked	Never drank alcohol	no	have	2.42	0.93	1.31	have	have	have		168	60		III	Never used before.	hematochezia			Colonoscopy (general)	Sigmoid colon cancer with bleeding, colon cancer may Colonic polyps	Endoscopy room 1		Emergency department	Adenocarcinoma, moderately differentiated	Entry time: 11 Intestinal cleanliness grade 4 The hook-pull method was used to enter the lens 70cm into the transverse colon, and the lens was successfully entered. The patient felt mild wheezing, and yellow feces could be seen in the transverse colon without further entering the lens. One ISP-type polyp, about 0.8×0.6cm in size, was found in the splenic flexure. There was a large amount of fecal…	The splenic flexure was 0.8cm		Sigmoid colon	Adenocarcinoma							11	4	The patient cannot tolerate.
27	male	80	1040257		2018-06-01 12:23:00	Never smoked	Never drank alcohol	no	no	3.38	0.95	1.78	have	no	no		176	60			Used intermittently	Follow-up for history of colon cancer/polyps			Colonoscopy (general)	After colectomy An uneven anastomosis	Endoscopy room 1		Examination	The intestinal mucosa was erosive and ulcerated, with granulation tissue formation and infiltration of a large number of plasma cells and neutrophils	Entry time: 30 intestinal cleansing Degree 3 The ileocecal valve was lip-shaped due to the distortion of the intestinal cavity, and the opening of the appendix was clear. There was no erosion or ulcer and new growth. The anastomotic site was 20cm from the anus. One side of the anastomotic nail residue was visible, the mucosa around the anastomotic nail was obviously hyperemia, slightly unsmooth, …											#VALUE!	3	yes
28	female	80	1038337		2018-04-13 10:00:00	Has quit smoking	Never drank alcohol	no	have	4.85	1.11	2.85	have	have	no	6.3	155	43		II	Currently taking	Abdominal pain or distension			Colonoscopy (general)	Multiple polyps in the colon One was clamped and the rest was resected by transurethral resection	Endoscopy room 1		Examination	Tubular adenoma (transverse colon), low grade	Entry time: 4 Intestinal clearance Cleanliness grade 3 The endoscope was inserted 80cm through the lumen to the end of the ileum, and the endoscope was successfully entered into the ileocecal valve. An IS-type polyp, 0.4cm in size, with smooth surface and same color as the surrounding, was seen in the ileocecal valve after the snare ligation. The wound was cleaned, and the specimen was taken out …	cross	Tubular adenoma									4	3	yes
29	male	80	1034590		2018-03-13 15:08:00	Never smoked	Never drank alcohol	no	no	3.92	1.36	2.58	have	no	no		170	75		III	Currently taking	hematochezia			Colonoscopy (general)	Multiple polyps in the colon Dentate line ulcer	Endoscopy room 5		Emergency department	no	Lens entry time: 6 Intestinal cleanliness grade 4-5 There were many yellow stools at the proximal end of the hepatic flexure. Five polyps were found in the descending colon and rectum. The diameter of the tip of the Ip polyp in the descending colon was 1.2cm, and the root was not erosive. Dark brown stool and a small amount of old blood were seen at the distal end of the rectum 15cm from the anus…											#VALUE!	5	Poor bowel preparation prevented completion.
30	male	80	1027953		2018-07-20 10:31:00	Has quit smoking	Never drank alcohol	no	have	3.25	1.09	1.82	have	have	no		163	58			Currently taking	Change in bowel habits			Colonoscopy (general)	Terminal ileum erythema, drug injury? Sigmoid colon polyps Melanosis of colon	Endoscopy room 1		Examination	1 (gastric antrum) pyloric gland type chronic gastritis (1+), active (-), atrophic (-), intestinal metaplasia (-), HP (-) 2 (gastric body) gastric fundic gland type chronic gastritis (1+), active (-), atrophic (-), intestinal metaplasia (-), HP (-) 3 (cardia) chronic gastritis of fundic gland type (1+), active (-), atrophic (-), intestinal metaplasia (-)	Entry time: 12 intestinal cleanliness 4 There was erythema scattered in the ileum at the end of the entry, with local mild congestion. There was no erosion or ulcer. The ileocecal valve was lip-shaped, the opening of the appendix was clear, and there was much fecal water and residue in the intestinal cavity. There was an IS-type polyp, size , in the sigmoid colon 30cm from the anus The polyp was …	Hepatic flexure	Chronic mucositis	cross	Tubular adenoma	Sigmoid colon	Tubular adenoma					12	4	yes
31	female	80	1022907		2017-06-20 14:36:00	Never smoked	Never drank alcohol	no	have	3.44	1.59	1.68	have	no	no		160	70		III	Never used before.	Change in bowel habits			Colonoscopy (painless)	Multiple erosions of colon Infection?	Endoscopy room 9		Examination	1. (Ascending colon) chronic inflammation of the colonic mucosa with mild activity, regular gland morphology, neutrophil infiltration in the glandular epithelium and lumen, inflammatory granulation tissue hyperplasia in the lamina propria, a large number of acute and chronic inflammatory cells infiltration, and surface inflammatory exudate coverage 2. (Transverse colon) chronic inflammation of th…	Entry time: 7 Intestinal cleanliness grade 4 The endoscope was inserted 90cm into the cecum by hook method. The ileocecal valve was lip-shaped and the opening of the appendix was clear. There was no erosion, ulcer or new growth. The remaining colonic mucosa was smooth, the vascular texture was clear, the plica of semilunar was intact, and there was no erosion, ulcer or neoplasm											7	4	yes
32	female	80	1022214		2017-05-04 11:15:00	Has quit smoking	Has stopped drinking	no	have	3.51	0.62	2.19	no	no	no	6	160	69		II	Never used before.	hematochezia			Colonoscopy (general)	Colon polyps Ulcerative colitis Left-sided colitis type Active phase	Endoscopy room 10		Examination	1. (Ascending colon) consistent with villous tubular adenoma 2. (Rectum) acute and chronic inflammation of the colon mucosa, erosion of the part, regular shape of the gland, several multinucleated giant cells in the mucosal layer, lymphoid tissue hyperplasia, please combine with clinical	Time of entering the endoscope: 6 intestinal cleanliness grade 4, the observation of local mucosa was unsatisfactory The ileocecal valve was lip-shaped, the opening of the appendix was clear, and no erosion and ulceration or neoplasm were observed. One polyp in the ascending colon was Yamada type II, about 0.4cm in size, and the surface mucosa was lobulated. A large number of purulent secretions …	l	Villous tubular adenoma	3 transverse ones	Tubular adenoma							6	4	yes
33	female	80	1021918		2017-05-17 10:44:00	Never smoked	Never drank alcohol	no	have	4.71	1.66	2.88	have	no	no	6	159	78		II	Never used before.	Follow-up for history of colon cancer/polyps			Colonoscopy (painless)	Colonic diverticulum Colonic polyps, multiple	Endoscopy room 9		Examination	1. (Cecal) tubular adenoma, low grade 2. (Ascending colon 1) Tubular adenoma, low-grade 3. (Ascending colon 2) tubular adenoma, low-grade 4. (Ascending colon 3) tubular adenoma, low-grade 5. (transverse colon) chronic inflammation of the polypoid colon mucosa 6. (Descending colon) tubular adenoma, low grade 7. (Sigmoid) tubular adenoma, low grade	Entry time: 6 bowel cleanliness grade 2 The ileocecal valve was lip-shaped and the opening of the appendix was clear. There was no erosion and ulcer or new growth in the ascending colon. There were two polyps in the ascending colon, type Yamada I, about 0.6cm and 0.4cm in size. The tip was false depression. A titanium clip was marked 20cm from the anus, and a polyp was Isp type, about 1.0cm in si…	Up to 4	Tubular adenoma	cross	Tubular adenoma	Sigmoid colon	Tubular adenoma					6	2	yes
34	female	80	1021333		2017-05-17 12:49:00	Never smoked	Never drank alcohol	no	have	4.04	0.77	2.4	have	no	have	6.3	155	60.5		II	Never used before.	Elevated tumor markers			Colonoscopy (painless)	Colon diverticula Colonic polyps, clamp clean	Endoscopy room 9		Examination	(Ascending colon) chronic inflammation of the polypoid colon mucosa with glandular metaplasia of the small intestine	Time of endoscopy entry: 4 Intestinal cleanliness grade 2 The ileocecal valve was lip-shaped and the opening of the appendix was clear. There was no erosion and ulcer or neoplasm. A polyp of Yamada type I, about 0.3cm in size, was found in the ascending colon with smooth surface mucosa. The inner mucosa was smooth, the vascular texture was clear, and the plica of semilunaris was intact. There was…											4	2	yes
35	male	80	1020836		2017-05-16 11:33:00	Has quit smoking	Never drank alcohol	no	no	3.55	0.48	2.06	no	no	no		174	52			Never used before.	Change in bowel habits			Colonoscopy (general)	Inflammation of the colon Ischemia? Infection? Colonic diverticulum	Endoscopy room 8		Examination	1. (Ascending colon) chronic inflammation of the colonic mucosa with individual eosinophil infiltration 2. (Transverse colon) chronic inflammation of the colonic mucosa with individual eosinophil infiltration	Entry time: 5 Intestinal cleanliness grade 2 The ileocecal valve was lip-shaped, the opening of the appendix was clear, there was no erosion and ulcer and new growth. There were diverticula at the beginning of the ascending colon, multiple hyperemia and bleeding spots and spots in the ascending, transverse, descending, and sigmoid colon, and the vascular network was fuzzy. The mucosa was crisper,…											5	2	yes
36	female	80	1017600		2017-01-18 09:15:00	Never smoked	Never drank alcohol	no	no	3.69	0.75	1.88	no	no	no		154	50			Never used before.	Abdominal pain or distension			Colonoscopy (general)	Colonic polyps Part clamp clean	Endoscopy room 8		Examination	1. (Ascending colon) Tubular adenoma, low grade 2. Chronic inflammation of the polypoid colonic mucosa (descending colon)	Entry time: 5 Intestinal cleanliness grade 2 The ileocecal flap was lip-shaped, the opening of the appendix was clear, and there was no erosion, ulcer or neoplasm. A flat polyp (0.5cm in size) was found in the ascending colon, and the surface mucosa was smooth. The biopsy forceps showed a polyp, type I, about 1.2cm in size, near the dentate line of the rectum, with villous changes in the surface …	l	Tubular adenoma	Descending colon	Chronic mucositis	Rectum 1cm	Tubular adenoma					5	2	yes
37	female	80	1001785		2021-12-01 08:55:00	Never smoked	Never drank alcohol	no	no	4.62	0.58	2.49	no	no	no		150	43		I	Never used before.	Change in bowel habits			Colonoscopy (painless)	Colon polyps Cold resection (CSP 1 piece) Multiple diverticula of the colon Rectal SMT-cyst may Appendiceal orifice edema	Endoscopy Room 4		Examination	Chronic inflammation of the polypoid colonic mucosa (descending colon)	Entry time: 8 intestinal cleanliness grade 2 Multiple diverticula were found in the transverse colon erosion. The size of the opening was about 0.2x0.5cm. The surface was smooth and the color was the same as the surrounding. There was no residual wound and no active bleeding. A 1.5x2.0cm eminence was found in the rectum about 10cm from the anus, with smooth surface, translucent color and soft tex…	Descending colon	Chronic mucositis									8	2	yes
38	male	80		2037457	2018-11-27 15:30:00																	Change in bowel habits			Colonoscopy (general)	Colonic telangiectasia Rectal polyp, clamp clean	Endoscopy room 5		Examination	Chronic inflammation of the mucosa of the colon (rectum) in the form of polypoid polyps	Entry time: 6 intestinal clearance Degree of cleanliness 2 A 0.5*0.5cm telangiectasia was found in the sigmoid colon, and a 0.5cmIsp polyp was found in the rectum. Biopsy forceps showed no obvious abnormalities in the remaining colon segment	Rectum	Chronic mucositis									6	2	yes
39	female	80		101980690	2019-12-25 09:33:00								have	no	no		155	56		III		hematochezia			Colonoscopy (painless)	Colonic polyps Clamp clean	Endoscopy room 5		Examination	Tubular adenoma (transverse colon), low grade	Lens entry time: 6 Intestinal cleanliness level 2 An ISP-type polyp (0.3cmx0.5cm in size) was found in the transverse colon about 75cm from the anus. The surface was smooth and the color was similar to the surrounding without erosion	cross	Tubular adenoma									6	2	yes
40	female	80		101585622	2020-11-06 15:01:00	Smoking now	Never drank alcohol	no	have	5.51	0.82	3.16	have	have	no		152	61		III	Never used before.	hematochezia			Colonoscopy (painless)	Multiple colorectal polyps 3 cold resected, 3 clamped, 1 to be resected (30cm sigmoid colon) Carcinoma of the rectosigmoid junction with incomplete obstruction and bleeding Poor bowel preparation	Endoscopy room 5	Colon cancer	Examination	Tubular adenoma (transverse colon), low grade The intestinal mucosa was infiltrated by chronic inflammatory cells. The glands were regular and unremarkable (Descending colon) the intestinal mucosa was infiltrated by chronic inflammatory cells, the glands were regular, and the superficial glands were slightly serrated (Descending colon) tubular adenoma, low grade (rectal) tubular adenoma, low grad…	Entry time: 4 Intestinal cleanliness grade 3-4 Solid feces were scattered in the intestinal cavity, covering the mucosa, which affected the observation of the ileocecal valve lip-shaped. The opening of the appendix was clear. Three polyps were seen in the transverse colon, two in the descending colon, and one IS-type polyp was seen in the rectum. The rest of the clamp removed the sigmoid colon ab…	cross	Tubular adenoma	cross	Chronic mucositis	drop	Tubular adenoma	Rectum	Tubular adenoma	Straight B junction	Adenocarcinoma	4	4	yes
41	female	80		125234955	2019-06-14 11:07:00	Never smoked	Never drank alcohol	no	have	3.96	5.52	1.61	have	have	have	7.9	157	64			Currently taking	Change in bowel habits			Colonoscopy (general)	Multiple polyps in colon, forceps clear Melanosis of colon	Endoscopy Room 4		Examination	(transverse colon) tubular adenoma, low-grade melanosis (transverse colon) tubular adenoma, low-grade melanosis (Descending colon) tubular adenoma, low-grade melanosis (Descending colon) tubular adenoma, low-grade melanosis	Entry time: 14 Bowel cleanliness grade 3-4 There was no obvious abnormality in the terminal ileum. The ileocecal valve was lip-shaped, the opening of the appendix was clear, and there was no erosion and ulcer or neoformation. The colon mucosa was generally dark brown tapped-like changes, and the vascular texture was unclear. Two ISS-type polyps were found in the descending colon The meat, about 0…	Transverse 2	Tubular adenoma	Down 2	Tubular adenoma							14	4	yes
42	male	80		101417623	2019-11-28 13:26:00	Has quit smoking	Has stopped drinking	no	have	3.49	0.67	2.19	no	have	no		170	46		II	Currently taking	Abdominal pain or distension			Colonoscopy (general)	Colon, cancer? Multiple polyps in the colon, untreated	Endoscopy room 8	Colon cancer	Examination	Tubulovillous adenocarcinoma (of the colon), medium	There was a mass in the sigmoid colon, which was uneven, red, with irregular surface shape, easy to bleed on contact, circumferential growth, narrow lumen, and the endoscope could not pass through. Three biopsy blocks were fragile and easy to bleed, and an Isp polyp was found about 30cm from the anus after pathological removal. The size was about 1.5x0.6cm, and the color was red. There was anothe…	Sigmoid colon	Adenocarcinoma									Failure	Data missing	Intestinal obstruction
43	female	80		103717831	2021-04-16 13:59:00				have	4.59	0.84	2.25	no	no	no		150	49		II	Never used before.	Follow-up for history of colon cancer/polyps			Colonoscopy (painless)	Multiple colon polyps Cold excision Multiple diverticula in the colon	Endoscopy Room 2		Cold cut	Tubular adenoma (caecum), low grade (Ascending colon) tubular adenoma, low grade	Entry time: 5 Bowel cleanliness grade 2-3 A 0.8*1.0cmIs polyp was seen in the cecum below the upper lip of the ileocecal valve, and a 0.6*0.6cmIs polyp was seen in the ascending colon, with smooth surface mucosa and similar color. A 0.5 cMISP-type polyp with smooth surface mucosa and the same color was seen in the ascending colon. The above three polyps were removed cold by snare, and the wounds …	Cecum	Tubular adenoma	l	Tubular adenoma	Sigmoid colon	Tubular adenoma					5	3	yes
44	female	80		101415927	2020-06-18 15:49:00	Never smoked	Never drank alcohol	no	have	3.61	2.12	1.75	have	have	no		156	60		III	Used intermittently	Abdominal pain or distension			Colonoscopy (painless)	The nature of circumferential lesion of ascending colon and erosive ulcer of ileocecum remains to be determined Multiple polyps of the colon Partial forceps removed, one left to EMR The nature of the rectal polyp remains to be determined Cecal diverticulum	Endoscopy room 1		Examination	Granulation tissue with many neutrophils infiltrating only a few superficial intestinal glands Scattered infiltration of lymphocytes and eosinophils was observed in the intestinal mucosa (ileocecal valve) chronic inflammatory cell infiltration in the superficial intestinal mucosa (Ascending colon) granulation tissue with more neutrophils infiltration (Ascending colon) tubular adenoma, low grade (…	Entry time: 10 intestinal cleanliness grade 3 There was no obvious abnormality at the end of the ileum. The ileocecal valve was lip-shaped, the opening of the appendix was not seen, and a diverticulum was seen in the cecum, with an inner diameter of about 0.4cm. Two ring ulcers, about 3cm and 4cm in length, covered with yellow and white moss, surrounded by hyperemia, edema and uneven mucosa, biop…											10	3	yes
45	male	80		1803048	2018-10-26 10:57:00	Has quit smoking	Has stopped drinking	no	have	3.65	1.1	2.07	have	no	no		167	67			Never used before.	Change in bowel habits			Colonoscopy (general)	Colonic polyps, forceps clear Melanosis of colon	Endoscopy room 5		Examination	(Ascending colon) tubular adenoma, low grade	Anal examination was negative. The time of endoscopy entry was 8 Bowel cleanliness was grade 2-3 There was no abnormal ileocecal valve lip-shaped at the end of the ileum. The opening of the appendix was clear. There was no erosion, ulcer and neoplasm. There was no erosion, ulcer and new Scattered flaky erythema was seen in the biorectum	l	Tubular adenoma									#VALUE!	3	yes
46	female	80		101588464	2020-12-10 12:41:00	Has quit smoking	Never drank alcohol	no	have	3.85	2.96	1.86	no	no	no	6.8	165	75		II	Never used before.	Abdominal pain or distension			Colonoscopy (painless)	Multiple colon polyps, 1 cold resection, 1 forceps net LST of transverse colon, to be resected by transurethral resection	Endoscopy room 3		Cold cut	(Ascending colon) tubular adenoma, low grade (Ascending colon) tubular adenoma, low grade	Entry time: 3 Bowel cleanliness grade 3 There was no obvious abnormality at the end of the ileum. The ileocecal valve was lip-shaped, the opening of the appendix was clear, there was no erosion and ulceration and new growth. There was an Isp polyp at the beginning of the ascending colon, about 0.5cm in size, with smooth surface and similar color to the surrounding. A 0.3cm ISP-type polyp was foun…	l	Tubular adenoma	l	Tubular adenoma	Transverse 1.2cm						3	3	yes
47	male	80		103573402	2019-07-01 09:44:00		Has stopped drinking						have	no	no		165	77		II		Follow-up for history of colon cancer/polyps			Colonoscopy (painless)	Multiple colon polyps Cold resection and partial forceps removal	Endoscopy room 3		Treatment (EMR)	Tubular adenoma (ascending colon), low grade (Ascending colon) tubular adenoma, low grade (Descending colon) tubular adenoma, low grade	Entry time: 3 Bowel cleanliness grade 3 The ileocecal valve was lip-shaped without erosion, ulcer or new growth. Poor bowel preparation affected the observation. One Yamada type I polyp, 0.6cm in size, with smooth surface, was observed in the ascending colon of the appendix, and was removed cold after snare ligation. There was another Yamada type II polyp in the ascending colon. The specimen was …	l	Tubular adenoma	l	Tubular adenoma	drop	Tubular adenoma					3	3	yes
48	male	80		102549192	2021-01-27 10:31:00				have	3.71	2.99	1.93	no	have	have							Follow-up for history of colon cancer/polyps			Colonoscopy (general)	Colonic polyps Cold incision Endoscopic hemostasis and disposal	Endoscopy Room 4		Examination	(Rectal) tubular adenoma, low grade	Entry time: 6 Bowel cleanliness grade 4 The hook pull method was used to enter the endoscope through the cavity to the end of the ileum, and the endoscope was successfully entered, but the intestinal preparation was not good. No abnormal ileocecal valve was observed in the end of the ileum, no erosion and ulcer and neoplasm The wound was observed to be clean, with a small amount of bleeding on th…	Rectum	Tubular adenoma									6	4	yes
49	male	80		1796542	2018-09-18 09:01:00				have	5.46	1.64	3.66	have	no	no		173	72		II		Change in bowel habits			Bowel cancer diagnosed by colonoscopy (painless) for 23 years	Colonic polyps Clamp clean and cold excision	Endoscopy room 3		Treatment (EMR)	1 (transverse colon) tubular adenoma, low grade; 2 (descending colon) tubular adenoma, low grade	Entry time: 10 bowel cleanliness grade 2 The ileocecal valve was lip-shaped and the opening of the appendix was clear. No erosion, ulcer or neoplasm was observed. The transverse colon polyp was Yamada type I, about 0.3cm in size, and the surface mucosa was smooth. The stump was not seen. The size of the stump was about 0.3 cm In the rest of bleeding, the colonic mucosa was smooth, the vascular te…	cross	Tubular adenoma	drop	Tubular adenoma							#VALUE!	2	yes
50	male	80		128304356	2018-02-12 14:10:00				have	3.36	0.75	1.44	no	have	no						Currently taking	Follow-up for history of colon cancer/polyps			Colonoscopy (general)	Multiple colon polyps Cold resection, forceps net An inverted appendix? Postoperative changes possible	Endoscopy Room 2		Examination	1 (Cecum) chronic polypoid intestinal mucositis 2 (hepatic flexure) tubular adenoma, low grade	Entry time: 15 intestinal clearance Degree of cleanliness 2 There was no abnormal ileocecal valve lip-shaped at the end of the ileum, the appendix area was raised, and the surface mucosa was smooth. There was no erosion and ulcer or neoplasm. There was an Isp polyp (about 0.4cm in size) near the appendix opening. The snare was fastened at the root of the polyp, The wound was clipped with a titani…	Hepatic flexure	Tubular adenoma									15	2	yes
51	male	80		128283462	2019-11-21 14:37:00	Never smoked	Never drank alcohol	no	no	3.23	0.57	1.38	have	no	no	6	168	75.5		II	Never used before.	Follow-up for history of colon cancer/polyps			Colonoscopy (painless)	Multiple colon polyps, cold resection Erythema of the ascending colon	Endoscopy Room 2		Examination	1 (ascending colon) chronic inflammation of mucosa with erosion; 2 (sigmoid colon) tubular adenoma, low grade; 3 (rectal) tubular adenoma, low-grade	Entry time: 40 intestinal cleanliness grade 2 The ileocecal valve was lip-shaped, the opening of the appendix was clear, there was no erosion and ulcer and irregular erythema at the beginning of the ascending colon. The mucosa between the lesions was normal. Biopsy *1 showed one ISISP-type polyp in sigmoid colon and rectum. The diameter of the polyp was 0.8*0.8, 0.6*0.6cm, and the surface was smo…	Sigmoid colon	Tubular adenoma	Rectum	Tubular adenoma							40	2	yes
52	male	80		124746381	2018-10-09 11:38:00	Never smoked	Never drank alcohol	no	have	5.18	1.17	3.32	have	no	no		166	62		II	Used intermittently	Change in bowel habits			Colonoscopy (general)	Multiple colon polyps, cold resection Melanosis of colon	Endoscopy room 5		Examination	1 (sigmoid colon) tubular adenoma, low grade; 2 (sigmoid) tubular adenoma, low grade	Anal examination was negative. Entry time: 20 bowel Tract cleanliness was 2-3 There was no abnormal ileocecal valve lip-shaped at the end of the ileum. The opening of the appendix was clear. There was no erosion and ulceration or new growth. After no active bleeding was observed on the wound surface, the endoscope was withdrawn The colonic mucosa was smooth with tessellation changes, the vascular…	Sigmoid colon	Tubular adenoma	Sigmoid colon	Tubular adenoma							20	3	yes
53	male	80		103162628	2020-09-04 16:56:00	Never smoked	Never drank alcohol	no	have	4.18	0.73	2.39	have	no	no		164	70		II	Never used before.	Follow-up for history of colon cancer/polyps			Colonoscopy (painless)	Multiple polyps in the colon Endoscopic colon polyp suction snare resection, cold resection, and forceps removal Right hemicolectomy	Endoscopy Room 4		Treatment (EMR)	1. Low-grade tubular adenoma (ascending colon) 2. (Ascending colon) low-grade tubular adenoma 3. (Ascending colon) low-grade tubular adenoma 4. (Ascending colon) chronic inflammation of the polypoid colonic mucosa 5. (Ascending colon) low-grade tubular adenoma 6. Chronic inflammation of the polypoid mucosa (transverse colon) 7. Hyperplastic polyps (descending colon) 8. (Rectum) low-grade villous …	To clean and lubricate the intestine, add a transparent cap on the front end of the electronic colonoscopy and insert it from the anus. Time: Next to the blind end of the ascending colon, there was an IS-like polyp, about 0.4cm in size, with smooth surface and the same color as the surrounding. Biopsy forceps were removed and the quality was soft. Two IS-like polyps, about 0.6cm in size, with smo…	Up to 4	Tubular adenoma	Descending colon	Hyperplastic polyps	Rectum	Villous tubular adenoma					2	4	yes
54	male	80		1140873	2016-12-09 11:04:00	Never smoked	Never drank alcohol	no	have	4.67	0.61	2.86	no	no	no	6.1	165	55			Never used before.	Change in bowel habits			Colonoscopy (general)	Colonic polyps	Painless examination room		Examination	1. (Ascending colon 1) Tubular adenoma, low grade (2) Villous tubular adenoma (large hepatic flexure of ascending colon), locally high grade, close to the resection margin (No.4, No.5) recommended regular review, or combined with clinical treatment for immunohistochemical markers SMA, Ki-67,P53, MLH1, MSH2, MSH6, PMS2, HE 3. (the colon liver 1) tubular adenoma, low level, the net cut edge (Hepati…	Entry time: 7 Intestinal cleanliness grade 3 Hook rafa benitez following cavity mirror 70 cm to the terminal ileum, smoothly into the mirror back to the blind is lip, appendix openings clear, did not see erosion ulcer and a new biological ascending colon polyps, Ip type, the size is about 0.8 cm, leaf surface mucosa, titanium clamp a tag hepatic flexure see a colon polyps, Ip type, the size is ab…	l	Tubular adenoma	l	Tubulovillous adenoma with small foci of high grade	3 hepatic flexure	Tubular adenoma					7	3	yes
55	male	80		1397732	2017-01-18 09:46:00				have				no	no	no						Never used before.	loss of weight			Colonoscopy (general)	Colon polyps Clamp clean	Endoscopy room 8		Examination	1. (Sigmoid colon) consistent with hyperplastic polyp 2. (Rectum) is consistent with hyperplastic polyps	Entry time: 5 Intestinal cleanliness grade 3 A polyp was found in the sigmoid colon, Yamada type I, about 0.4cm in size, with smooth surface mucosa, and one biopsy piece was forceps. A polyp was found 5cm from the rectum to the anus, Yamada type I, about 0.4cm in size, with smooth surface mucosa. The colonic mucosa was smooth, the vascular texture was clear, the plica of semilunar was intact, and…	Sigmoid colon	Hyperplastic polyps	Rectum	Hyperplastic polyps							5	3	yes
56	female	80		1001468474	2021-12-24 09:34:00				have	6.22	0.86	4.53	no	no	no		155	48		II		Change in bowel habits			Colonoscopy (painless)	Multiple polyps in the colon Clamp 1 The rest should be cut by electric Poor bowel cleanliness	Endoscopy room 5		Examination	Liter: Tubular adenoma	Entry time :3 Ottawa review: R:4+M:3+R-S:3+ liquid :2= 12, influence observation The ileocecal valve was lip-shaped and the opening of the appendix was clear. No erosion, ulcer or neoplasm was observed. Two IS-type polyps (0.4 and 0.6cm in size) with smooth surface were found in the ascending colon, and IIIl type glandular orifice was seen. A transverse colon diverticulum (0.4*0.5cm) was found. T…	l	Tubular adenoma	l		Transverse 1.2cm						3	Ottawa 12	yes
57	male	80		1001319030	2021-11-08 10:30:00								have	no	have		171	70		II	Never used before.	Positive fecal occult blood			Colonoscopy (painless)	Colonic polyps 1 was clamped and 2 were to be resected by electrotomy Rectal air cyst	Endoscopy Room 2		Examination	Tubular adenoma, low grade	Entry time: 4 Bowel cleanliness grade 3 The ileocecal valve was lip-shaped and the opening of the appendix was clear without erosion or ulceration or neoplasm. A polyp was found in the ascending colon near the hepatic flexure. Yamada type II, about 1.0cm in size, and a polyp was found in the hepatic flexure of the colon with a lobulated surface mucosa. LST-G, 1.5X2.0cm, nodule about 8mm, mucosal …	L 1cm		l	Tubular adenoma	2cm sigmoid colon						4	3	yes
58	female	80		101425250	2021-09-29 09:19:00								have	no	no							Change in bowel habits			Colonoscopy (general)	Multiple diverticula in colon Colonic polyps To be removed	Endoscopy room 3		Examination	no	Entry time: 4 Intestinal cleanliness grade 2 Multiple diverticula were found in the ascending colon without bleeding or erosion. One ISP-type polyp (0.6cmx0.6cm in size) was found at 20cm from the anus in the sigmoid colon	Sigmoid colon 0.6cm										4	2	yes
59	male	80		2174967	2021-09-23 10:11:00				have	5.27	0.73	3.15	have	no	no		170	65		II	Never used before.	Change in bowel habits			Colonoscopy (painless)	No abnormalities were found in the colonic mucosa	Endoscopy room 5		Examination	no	Lens entry time: 4 Intestinal cleanliness level 3 The ileocecal valve was lip-shaped, the opening of the appendix was clear, and no erosion or ulcer or neoplasm was observed. The colonic mucosa was smooth, the vascular texture was clear, and the plica of semilunaris was intact, and no erosion, ulcer or neoplasm was observed											4	3	yes
60	male	80		1242831	2021-07-19 10:01:00				have	4.69	0.98	2.94	no	no	have	8.1	172	65			Used intermittently	Follow-up for history of colon cancer/polyps			Colonoscopy (painless)	Colon polyps CSP3	Endoscopy room 5		Examination	Tubular adenoma	Entry time: 5 Intestinal cleanliness grade 3 The ileocecal valve was lip-shaped, and the opening of the appendix was clear. There was no erosion and ulcer or neoplasm. Two Isp polyps were observed in the ascending colon, with smooth surface and similar color, about 0.5cm and 0.3cm in size. After the snare was ligated, the wound was observed to be clean, and the specimen was retrieved and sent for…	l	Tubular adenoma	l	Tubular adenoma	Sigmoid colon	Tubular adenoma					5	3	yes
61	male	80		1190074	2021-06-03 15:13:00	Never smoked	Never drank alcohol	no	have	3.12	1.19	2.08	no	no	no		175	57.5		II	Never used before.	anemia			Colonoscopy (painless)	No abnormalities were found in the whole colonic mucosa	Endoscopy room 3		Examination	no	Entry time: 15 Intestinal cleanliness grade 3 No abnormal ileocecal valve was found in the terminal ileum. The opening of the appendix was clear, and no erosion or ulcer or neoplasm was observed. The colonic mucosa was smooth, the vascular texture was clear, and the plica of semilunaris was intact, and no erosion, ulcer or neoplasm was observed											15	3	yes
62	female	80		117282861	2019-04-30 15:26:00	Never smoked	Never drank alcohol	no	have	4.44	2.27	2.83	have	no	have	7.1	162	72			Never used before.	hematochezia			Colonoscopy (general)	Multiple colon polyps, forceps and cold resection Rectal cancer may Poor bowel cleanliness	Endoscopy Room 4		Examination	Ileocecal: tubular adenoma, ascending: tubular adenoma, rectum: tubular adenocarcinoma.	Time to enter the endoscope: 12 Intestinal cleanliness was grade 4, which affected the observation No abnormality was found in the terminal ileum. The ileocecal flap was lip-shaped, the opening of the appendix was clear, and no erosion and ulceration or new growth was observed. One Is polyp was found in the upper lip of the ileocecal flap, and another Is polyp was found in the contralateral ascen…	Ileocecal region	Tubular adenoma	l	Tubular adenoma	Rectum	Adenocarcinoma					12	4	yes
63	female	80		100844993	2018-07-05 11:07:00	Never smoked	Never drank alcohol	no	have	4.67	1.58	2.94	have	no	have	7.4	165	73		II	Never used before.	Abdominal pain or distension			Colonoscopy (painless)	No abnormalities were found in the whole colonic mucosa Mixed hemorrhoids Anal orifice Nodules - Anal papilla hyperplasia?	Endoscopy Room 2		Examination	no	Entry time: 5 Intestinal cleanliness 3 Grade The ileocecal valve was lip-shaped, the opening of the appendix was clear, and no erosion, ulcer or neoplasm was observed. The colonic mucosa was smooth, the vascular texture was clear, the plica of semilunaris was intact, and no erosion, ulcer or neoplasm was observed. A diverticulum was found in the sigmoid colon 40cm from the anus, 0.4cm from the an…											5	3	yes
64	male	80		101315252	2018-04-16 14:11:00								have	no	no							Positive fecal occult blood			Colonoscopy (general)	Poor bowel preparation The colon was found to be normal	Endoscopy room 3		Examination	no	Entry time: 10 Intestinal cleanliness grade 4 The ileocecal flap was lip-shaped, the opening of the appendix was clear, and no erosion or ulcer or neoplasm was observed. The colonic mucosa was smooth, the vascular texture was clear, and the plica semilunaris was intact, and no erosion, ulcer or neoplasm was observed											#VALUE!	4	yes
65	male	80		101968642	2017-04-06 12:26:00	Has quit smoking	Never drank alcohol	no					no	no	no	5.5	160	57.5			Never used before.	Change in bowel habits			Colonoscopy (general)	Multiple LST in colon Melanosis of the colon Anal fissure	Endoscopy room 8		Examination	no	Lens entry time: 7 hours intestinal cleanliness grade 4 Multiple erythematous ileocecal flaps in the terminal ileum were lip-shaped, the opening of the appendix was clear, and no erosion or ulcer or new growth was observed. The colonic mucosa was generally dark brown, the vascular texture was not clear, and the plica of semilunaris was intact. There was a flat eminence of about 1.0×0.8cm on the o…	Ascending colon	Tubular adenoma	Ascending colon	Tubular adenoma	Ascending colon	Tubular adenoma	Transverse colon	Tubular adenoma	Descending colon	Tubular adenoma	7	4	yes
66	male	80		115519126	2016-08-17 08:35:00	Never smoked	Never drank alcohol	no	have				have	no	have		174	62			Never used before.	Follow-up for history of colon cancer/polyps			Colonoscopy (general)	There were no abnormal findings in the whole colon and rectum	Painless examination room		Examination	no	Digital anal examination was negative for 6 minutes and the bowel cleanliness was grade 3 The ileocecal valve was lip-shaped. The opening of the appendix was clear. The colorectal mucosa was smooth, the vascular texture was clear, and the semilunar fold was intact											6	3	yes
67	male	80		1059032	2015-11-18								have	no	no							Follow-up for history of colon cancer/polyps			Colonoscopy (general)	Ileocecal cancer? Pending pathology Multiple polyps in the colon were partially removed Colon surgery Biopsy :[1] hepatic flexure colon, 5 polyps; [2] 6 ascending colon cancers;	Endoscopy room 1			Hepatic flexure: low grade intraepithelial rheology, ascending colon: moderately differentiated adenocarcinoma.	Rectal digital examination was negative There was a large amount of fecal water in the intestinal cavity, which slightly affected the observation. There was a nodular mass near the ileocecal junction of the ascending colon, occupying 1/2 of the lumen. The surface was hyperemia, erosion, and contact bleeding, involving the ileocecal junction. There were 0.5cm2 and 0.6cm2 hemisphere polyps on the a…	Ascending colon	Adenocarcinoma	There were 2 hepatic flexures	Tubular adenoma							Data missing	Data missing	yes
68	male	80 Oct	1042785		2024-05-29 16:23:00	Never smoked	Never drank alcohol	no	no	4.14	1.16	2.98	have	no	no		175	75		III	Never used before.	Follow-up for history of colon cancer/polyps			Colonoscopy (painless)	Colonic polyp, cold removal Postoperative colon (poor bowel cleanliness)	ERCP	Colonic polyps	Treatment (EMR)	Tubular adenoma GI	The transverse colon could not be observed. There was a large amount of fecal water and fecal residue in the transverse colon. One Is polyp was found in the transverse colon, about 0.8cm in size, smooth surface and slightly red color	cross	Tubular adenoma									Data missing		yes
69	female	80 Oct		100926043	2024-03-29 10:23:00	Never smoked	Never drank alcohol	no	have	3.4	4.56	1.11	have	have	have	6.5	155	60		II	Currently taking	Follow-up for history of colon cancer/polyps			Colonoscopy (painless)	Colonic polyps - cold excision	Endoscopy Room 4	Colonic polyps	Examination	Tubular adenoma, GII	Beijing time 12, BBPS4. 0.5 cmIs arena, cold resection	Descending colon	Tubular adenoma									12	4
70	male	80 Oct		1002541848	2023-02-01 09:50:00				have	5.58	0.89	3.62	no	no	no		170	61		II		Follow-up for history of colon cancer/polyps			Colonoscopy (painless)	After rectal anastomosis Anastomotic ulcer Ascending colon polyps, it is recommended that the EMR treatment in hospital Sigmoid colon polyp, forceps net	Endoscopy room 3	Colonic polyp, ulcer	Examination	Chronic mucositis	Entry time: 5 BBPS: LC:1+TC:1+RC:2= No abnormality was found in the mucosa of the terminal ileum. The ileocecal valve was lip-shaped, the opening of the appendix was clear, no erosion and ulceration and new growth were observed. A Yada type III polyp was found near the hepatic flexle of the ascending colon, 1.0*1.0cm in size, with a lobe, smooth surface mucosa, and no white spot at the root. Took…	Ascending colon 1 cm		Rectum	Chronic mucositis							5	4	yes
71	female	80 in November	1154121		2024-02-21 11:12:00	Never smoked	Never drank alcohol	no		4.83	0.73	2.96	no	no	no		148	39		III	Never used before.	hematochezia	No complications	Survival	Colonoscopy (painless)	Rectal cancer, Borrmann type III Ascending colon diverticulum Multiple polyps in the colon, to be removed (Poor bowel cleanliness)	Operating room	Rectal cancer, colon polyps, diverticulum	Examination	Metaplastic adenocarcinoma (rectum)	Entry time: 11 BBPS: LC:1+TC:2+RC:2= 5 Hook rafa follow cavity into the mirror to the terminal ileum, into the mirror owe smoothly terminal ileum not seen obvious abnormal back to the blind Is lip, back to the upper lip see blind disc type 1 0.6 cm Is polyp; Appendix openings clear liquid cecum, ascending colon middle more dung, watch less satisfaction within the left half colon lumen more waste …	There were 5 LST in the whole colon, the largest one was 1.5cm		Rectum	Adenocarcinoma							11	5	yes
72	female	80 in November	1050951		2022-11-21 15:09:00	Never smoked	Are drinking alcohol	no	have	2.95	2.49	1.23	have	no	have	7.9	158	65		III	Never used before.	Change in bowel habits			Colonoscopy (painless)	Colonic polyps Clamp net Colon SMT Lipoma possible	Endoscopy room 1	Colonic polyp, SMT	Examination	(transverse colon) consistent with tubular adenoma, low grade	Insertion time: 7BBPS: LC:2+TC:3+RC:3=8 The endoscope was inserted through the cavity to the end of the ileum by hook method. After entering the endoscope, an IS-type polyp was found about 65cm from the transverse colon to the anus, with smooth surface and similar color, and no erosion. There was no obvious abnormality in the remaining yellow colon segment	cross	Tubular adenoma									7	8	yes
73	male	80 in November		2186026	2024-03-04 14:16:00	Never smoked	Are drinking alcohol	no	no	4.15	1.13	2.69	no	no	no	5.8	178	85		II	Never used before.	Abdominal pain or distension			Colonoscopy (painless)	Colonic polyps Clamp clean	Endoscopy Room 4	Colonic polyps	Examination	Hyperplastic polyp (descending colon) (Transverse colon) tubular adenoma, GII	Insertion time: 5BBPS: LC:2+TC:2+RC:2=6 Two IS-type polyps, both about 0.4cm in size, with smooth surface and similar color without erosion, were found about 50cm from the transverse colon to the anus. NICE type II was observed by BLI staining. Biopsy forceps showed one IS-type polyp, both about 0.3cm in size, with smooth surface, about 35cm from the anus. Biopsy forceps showed that the descendin…	cross	Tubular adenoma	drop	Hyperplastic polyps							5	6	yes
74	female	80 in November		101588437	2023-06-08 11:13:00					4.09	1.43	2.21	have	no	no		158	68.5		II	Currently taking	Positive fecal occult blood			Colonoscopy (painless)	Cecal polyps Cecal SMT, lipoma possible	Endoscopy room 3	Colonic polyp, SMT	Examination	Tubular adenoma (caecum), GⅠ	Insertion time :3 BBPS: LC:2+TC:3+RC:2=7 The scope was inserted 70cm through the lumen to the end of the ileum by hook draw method, and the scope was smoothly entered. There was no abnormal ileocecal valve lip-shaped, the opening of the appendix was clear, and no erosion and ulcer were observed. There was an Is polyp in the cecum, with a size of 0.3x0.3cm, rough surface and similar color to the s…	Cecum	Tubular adenoma									3	7	yes
75	female	80 in November		2254906	2022-12-06 11:46:00					2.53	0.88	1.12	no	no	have		156	57		II	Never used before.	Change in bowel habits			Colonoscopy (painless)	Colon inflammation, pending pathology	Endoscopy Room 2	Colon infection	Examination	1. (Ascending colon) chronic inflammation of the polypoid colon mucosa with active inflammation 2, (transverse colon) polypoid colonic mucosal chronic inflammation, with interstitial edema	Lens entry time: 11 BBPS: LC:2+TC:2+RC:3=7 The ileocecal valve was lip-shaped, the ascending colon and transverse colon were not found in the opening of the appendix, and the mucosa was rough, and the vascular network was not clear. Each biopsy was *1, and the texture was soft											11	7	yes
76	male	80 years and 14 days	1141770		2023-08-29 15:48:00	Smoking now	Never drank alcohol	no		4.72	2.54	2.77	have	have	no		170	82		III	Currently taking	Follow-up for history of colon cancer/polyps	No complications	Survival	Colonoscopy (painless)	Multiple polyps in the colon Forceps removed 6 Colonic polyp suction snare resection via electronic endoscopy	Endoscopy Room 2	Colonic polyps	Treatment (EMR)	Ascending: focal chronic inflammation of colorectal mucosa, transverse: tubular adenoma, ascending and descending: tubular adenoma, ascending: tubular adenoma, ascending: tubular adenoma, ascending: tubular adenoma; Hepatic flexure: hyperplastic polyp, straight and sigmoid: tubular adenoma	Clean and lubricating the intestinal tract, insert a transparent cap on the front end of the electronic colonoscope, and insert into the scope from the anus. Time: 2BBPS: LC:2+TC:2+RC:3=7 The ileocecal valve was lip-shaped, the opening of the appendix was clear, and there was no erosion and ulceration or new growth. Four Isp and Is polyps were found in the ascending colon, with a size of 0.6*0.7 …	There were 7 polyps, the largest being 0.8cm	Tubular adenoma									2	7	yes
77	male	80 years and 14 days		1000834490	2024-01-29 09:55:00	Has quit smoking	Never drank alcohol	no		4.92	0.56	2.63	no	no	no	6.6	151	48		III		loss of weight			Colonoscopy (general)	Rectum, Borrmann type III carcinoma possible Endoscopic hemostasis and management Multiple polyps in the colon (Poor bowel cleanliness)	Endoscopy room 7	Rectal cancer, colonic polyps	Examination	(Rectal) high grade intraepithelial neoplasia, the specimen is superficial, please combine with clinical	A large amount of fecal water and debris in the intestinal cavity affected the view, and could not be continued to enter the scope. A 0.8cm Isp polyp was found in the sigmoid colon, a 1.5cm Isp polyp was found 10cm from the rectum to the anus, and a mass was seen at the edge of the dentate line of the slightly lobar rectum 6 cm-1 cm from the anus. The lesion was about 5×4cm in size, with elevated…	Rectum	Adenocarcinoma	Sigmoid colon		Rectum 1.5cm						Failure	Data missing	Poor bowel preparation prevented completion.
78	male	80 years and 16 days	1159228		2024-05-08 16:09:00	Never smoked	Never drank alcohol	no	no	3.15	0.69	2.34	no	no	no		174	72		III	Never used before.	Abdominal pain or distension			Colonoscopy (painless)	Intraoperative colonoscopy Hepatic flexure LST Multiple polyps in colon to be resected by transurethral resection	Operating room	Colonic polyps	During the operation	Transverse colon: Tubular serrated adenoma, GII.	A 2.2×2.5cm LST was found in the hepatic flexure, with a bulge in the center and a villous tip. With the help of surgical localization, the endoscope was removed and another 0.8×1.0cm ISP-type polyp was found in the transverse colon, and a 1.5×1.0cm ISP-type polyp was found in the rectum	The hepatic flexure was 2.2 × 2.5cm	Tubular serrated adenoma	Transverse colon	Tubulovillous adenoma, small focus advanced edition	Rectum	Tubulovillous adenoma					Failure	Data missing	Target lesion detected
79	female	80 years and 19 days		1163986	2024-06-21 16:20:00	Has quit smoking	Has stopped drinking	no					have	no	have		163	Missing			Never used before.	hematochezia	No complications	Survival	Colonoscopy (general)	Multiple ulcers in the colon Infection was possible, but ischemia was excluded With bleeding The nature of the ascending colon bulge is to be determined Pseudotumor? Melanosis coli	Endoscopy Room 4	Ischemic colitis?	Examination	Ascending: focal chronic inflammation of the mucosa of the large intestine, interstitial vascular dilatation, congestion, bleeding, accompanied by fibrous tissue proliferation, showing ischemic changes, transverse: a very small amount of mucus and inflammatory exudation. CMV-.EBV-	After saline enema, the endoscope was moved through the cavity to the ascending colon. After entering the endoscope, multiple ulcers were found in the ascending colon and descending colon, with different shapes, worm erosion, irregular longitudinal ulcers and patchy ulcers, different sizes, covered with dirt and moss, and the surrounding mucosa was obviously swollen and red. There was an ulcer 38…											Failure	6	yes
80	male	80 in January	1123812		2022-10-26 15:41:00	Never smoked	Never drank alcohol	no	no	2.85	1.36	1.3	no	no	no		164	60		III	Never used before.	Follow-up for history of colon cancer/polyps	No complications	Survival	Colonoscopy (painless)	After colon surgery Multiple colon polyps Melanosis coli Colon bulge, recurrence?	Endoscopy room 6	Colonic polyps, melanosis	Examination	Chronic mucositis	Entry time: 4BBPS: LC:2+TC:3+RC:2= 7 The ileocecal flap was lip-shaped, the opening of the appendix was clear, and there was no erosion or ulceration or new growth. There were 4 polyps, type Is, 0.5-0.8cm in size, smooth surface in the ascending colon, hepatic flexure and hepatic flexure of the ascending colon. There was a raised lesion (intestinal opening could be seen below the lesion) about 5c…	There were 4 polyps in the ascending colon										4	7	yes
81	female	80 in January	1120551		2024-06-12 14:28:00	Never smoked	Never drank alcohol	no		4.97	1.56	2.83	have	no	have	7.4	156	65		III	Never used before.	Follow-up for history of colon cancer/polyps	No complications	Survival	Colonoscopy (painless)	Multiple diverticula in the colon	Endoscopy room 5	Colonic diverticula	Examination	no	Entry time: 5BBPS: LC:2+TC:3+RC:2=7 The ileocecal valve was lip-shaped, the opening of the appendix was clear, and no erosion or ulcer or neoplasm was observed. Multiple diverticula were found in the whole colon, 0.4-0.7cm in diameter, with smooth bottom or feces											5		yes
82	male	80 in January	1117324		2022-05-16 14:12:00	Has quit smoking	Has stopped drinking	no		4.44	1.06	2.66	no	no	no		168	63.5		III	Currently taking	hematochezia	No complications		Colonoscopy (painless)	Rectal polyp to be removed Colonic eminence lesion, Eversion of diverticulum?	Endoscopy room 1	Polyps	Examination	Hepatic flexure, ascending: sessile serrated lesion, sigmoid: serrated lesion, rectum: tubular adenoma	Insertion time: 4BBPS: LC:2+TC:3+RC:3= 8 The ileocecal valve was lip-shaped, and the opening of the appendix was clear. There was no erosion, ulcer or neoplasm. An Isp type protruding lesion, 0.5*0.5*0.8cm in size, with smooth surface and slightly white, was found 15cm from the anus to the rectum. There was an ISP-type polyp, 0.6*0.8cm in size, lobulated, slightly sunkered and red in the center, …	Hepatic flexure	Sessile serrated lesions were seen	Ascending colon	Sessile serrated lesions were seen	Sigmoid colon	Serrated lesions	Rectum	Tubular adenoma			4	8	yes
83	female	80 in January	1093771		2023-04-23 10:43:00	Never smoked	Never drank alcohol	no	have	5.6	3.62	3.09	no	no	no		164	51		III	Never used before.	Follow-up for history of colon cancer/polyps			Colonoscopy (painless)	Colonic polyps Cold excision Multiple diverticula of the colon Postoperative changes of the colon	Endoscopy Room 2	Colonic polyps, diverticula	Examination	Ascending: villous tubular adenoma, the remaining 3 were all tubular adenomas	Insertion time: 4 BBPS: LC:3+TC:3+RC:2= 8 The ileocecal valve was lip-shaped and the opening of the appendix was clear. There was no erosion, ulcer or neoplasm at the end of the ileum. Several diverticula with a size of 1-1.5cm were observed in the ascending colon, and stool retention was observed in some diverticula. The specimen was not recovered successfully. The anastomosis was found about 10…	l	Villous tubular adenoma	3.	Tubular adenoma							4	8	yes
84	female	80 in January		125100127	2024-04-25 09:17:00	Never smoked	Never drank alcohol	no	have	5.23	1.92	3.07	have	no	have		158	55			Never used before.	Follow-up for history of colon cancer/polyps			Colonoscopy (general)	Straight B junction multiple polyps, metaplastic? Pliers net 1	Endoscopy room 7	Colonic polyps	Examination	Hyperplastic polyps	Lens entry time: 15 BBPS: LC:3+TC:3+RC:2= 8 The ileocecal valve was lip-shaped, the opening of the appendix was clear, and there was no erosion or ulcer or neoplasm. The size of Is polyps was 0.2-0.4cm. The surface was smooth, the color was slightly white, and the biopsy texture was soft	Sigmoid colon	Hyperplastic polyps									15	8	yes
85	male	80 in January		117225557	2022-08-01 09:04:00	Never smoked	Never drank alcohol	no	have	2.73	0.66	1.22	have	have	have	7.5	165	80			Currently taking	Follow-up for history of colon cancer/polyps			Colonoscopy (general)	No abnormalities were found in the whole colonic mucosa	Endoscopy room 5	No abnormalities seen	Check (enlarge)	no	Lens entry time: 12BBPS: LC:2+TC:3+RC:0= 8 The ileocecal valve was lip-shaped, the opening of the appendix was clear, and no erosion or ulcer or neoplasm was observed. The colonic mucosa was smooth, the vascular texture was clear, and the plica of semilunaris was intact, and no erosion, ulcer or neoplasm was observed											#VALUE!	8	yes
86	male	80 years and 20 days		1827325	2024-05-09 09:03:00	Never smoked	Never drank alcohol	no	have	4.79	0.62	2.94	no	no	no		170	47		II	Used intermittently	Follow-up for history of colon cancer/polyps			Colonoscopy (general)	Colonic polyposis - Clamp clean	Endoscopy Room 2	Colonic polyps	Examination	(Transverse colon) tubular adenoma, G I	Entry time: 9BBPS: LC:2+TC:2+RC:1=5 The ileocecal valve was lip-shaped, the opening of the appendix was clear, and there was no erosion or ulceration or neoplasm. A 0.4cm polyp was found in the transverse colon, which was smooth and forceps. The colonic mucosa was smooth, the vascular texture was clear, and the plica was intact	cross	Tubular adenoma									9	5	yes
87	female	Aged 80 in February		118348617	2023-08-31 14:30:00				no	3.61	4.2	1.31	no	no	no		148	59		II	Never used before.	Abdominal pain or distension			Colonoscopy (painless)	Rectal polyps Forceps net	Endoscopy room 3	Rectal polyps	Examination	(Rectal) tubular adenoma, GI	Time of entry: 4 BBPS: LC:3+TC:2+RC:1= 6 More semidolid stool in ascending colon affected observation A 0.4cmIs polyp was found in the rectum. The surface mucosa was smooth and white. The remaining biopsy forceps showed smooth colon mucosa, clear vascular texture, intact semilunar fold, and no erosion, ulceration or neoplasm	Rectum	Tubular adenoma									4	6	yes
88	male	Aged 80 in February		114090232	2022-10-26 11:05:00					3.33	1.5	1.8	have	no	have		177	80		II	Currently taking	Change in bowel habits			Colonoscopy (painless)	Multiple polyps of the colon Cold excision Rectal polypoid protuberance-combined with pathology Melanosis of the colon	Endoscopy room 6	Colonic polyps	Examination	1. Tubular adenoma (transverse colon), low-grade, with mucosal melanosis 2. (Rectal) tubular adenoma, low-grade 3. Chronic inflammation of the mucosa with melanosis	Insertion time: 30BBPS: LC:2+TC:2+RC:2= 6 The ileocecal flap was labial-shaped, and one 0.6 cMIS-like polyp was found in the transverse colon and rectum, respectively. The surface mucosa was smooth and white, and the snare was lifted up and removed cold. One biopsy was soft, and the colonic mucosa was smooth, tesselate-like vascular texture was changed, and the plica of semilunaris was intact. Th…	Transverse colon	Tubular adenoma	Rectum 1cm	Tubular adenoma	Rectum	Chronic mucositis					#VALUE!	6	yes
89	male	Aged 80 in March	1159614		2024-04-29 15:13:00	Never smoked	Never drank alcohol			2.78	4.98	1.18	have	have	no	6.2	168	82			Currently taking		No complications	Survival	Colonoscopy (general)	Rectal cancer - high probability of malignancy Poor bowel preparation	Endoscopy room 1	High likelihood of rectal cancer, stage: (T3N1M0)	Examination	(Rectal) tubular adenoma, high grade (intramucosal cancer), superficial sampling, can not exclude more serious lesions, please combine with clinical practice	Endoscopic entry time: 3 BBPS: LC:1+TC:1+RC:2= 4 A large amount of residue in the intestinal cavity was found successfully. The ileocecal valve was lip-shaped, the opening of the appendix was clear, and there was no erosion and ulceration or neoplasm. An ulcerated protruding lesion was found near the anal opening of the rectum, irregular shape, transverse involving about 1/3 of the circumference,…	Rectal malignancy	Adenocarcinoma									3	4	yes
90	female	Aged 80 in March		113917428	2023-07-13 11:52:00	Never smoked	Never drank alcohol	no	have	3.81	0.77	2.05	have	no	no						Used intermittently	Change in bowel habits			Colonoscopy (general)	Colonic polyps (forceps removed) Cicatricial changes in the rectum	Endoscopy room 6	Colonic polyps	Examination	Tubular serrated adenoma, GII hyperplastic polyp (transverse colon) hyperplastic polyp	Insertion time: 8 BBPS: LC:2+TC:2+RC:2= 6 Two 0.5*0.5cmIs polyps were found in transverse colon. The surface was smooth, red, and NICE type 2 under staining endoscopy. Biopsy forceps was used to remove the polyps. A white scar of about 1 * 1cm was found in the rectum 3 cm from the anal, with a regular submucosal vascular network in the center, and the surface was smooth. The remaining colonic muc…	cross	Tubular serrated adenoma	cross	Hyperplastic polyps							8	6	yes
91	female	Aged 80 in March		103088286	2022-03-03 09:37:00	Never smoked	Never drank alcohol	no	have	5.14	0.89	2.46	have	no	no	5.7	165	55		III	Never used before.	Follow-up for history of colon cancer/polyps			Colonoscopy (general)	Colonic multiple polyps, cold endoscopic resection and biopsy	Endoscopy Room 2		Treatment (EMR)	Blind: tubular adenoma, ascending: tubular adenoma, ascending: hyperplastic polyp, ascending: chronic mucosal inflammation, sigmoid: hyperplastic polyp	Lens entry time: 8BBPS: LC:2+TC:3+RC:2= 7 No abnormal ileocecal flap lip shape was found in the mucosa of the terminal ileum. A flat elevated polyp, 0.4*0.4cm, smooth, soft, and similar in color, was found in the cecum. Biopsy forceps showed an Amada type II polyp, 0.6*0.6cm, leaf, red, soft, and cold cut with snare. The wound was clean, no active bleeding was observed, and another polyp was foun…	Cecum	Tubular adenoma	l	Tubular adenoma	l	Hyperplastic polyps					8	7	yes
92	female	80 in April		113925067	2023-10-24 14:20:00	Never smoked	Never drank alcohol	no	have	4.87	2.14	2.09	have	no	no	5.3	162	66		IV	Used intermittently	Positive fecal occult blood			Colonoscopy (painless)	Colonic polyp, forceps removed Rectal cancer, pending pathology may be large	Endoscopy room 5	Rectal cancer, colonic polyps	Examination	(Descending colon) consistent with hyperplastic polyp; (rectum) consistent with adenocarcinoma	Insertion time: 7 BBPS: LC:2+TC:3+RC:2= 7_X000D_ No abnormalities were found in the mucosa of the terminal ileum. The opening of the appendix was clear, and no erosion or ulceration or neoplasm was observed. An IStype polyp (0.4x0.4cm in size) was found in the descending colon, which was similar in color and irregular in shape. The tumor was about 2.0x1.8cm in size, with central depression, circu…	drop	Hyperplastic polyps	Rectum	Adenocarcinoma							7	7	yes
93	female	80 in May	1134151		2023-05-17 13:58:00	Never smoked	Never drank alcohol	no	have	2.46	1.54	0.97	have	no	no		162	60			Never used before.	hematochezia			Colonoscopy (general)	Colonic polyp, cold removal Melanosis coli Internal hemorrhoids	Endoscopy room 1	Colonic polyps, melanosis	Examination	Hyperplastic polyps	Lens entry time: 9BBPS: LC:2+TC:2+RC:3=7 The ileocecal flap was lip-shaped, the opening of the appendix was clear, no erosion and ulceration or new growth was observed. An IS-type polyp was found in the sigmoid colon, 0.4*0.5cm in size, slightly white and smooth, the snare was removed cold, and no residual was found at the broken end. There was no erosion, ulcer or neoplasm, and internal hemorrho…	Sigmoid 0.5	Hyperplastic polyps									9	7	yes
94	female	80 in May		100320198	2022-12-29 09:03:00	Never smoked	Never drank alcohol	no	have	3.48	1.59	1.83	have	no	have		150	59		II	Currently taking	Follow-up for history of colon cancer/polyps			Colonoscopy (painless)	No abnormalities were found in the colonic mucosa	Endoscopy Room 4	No abnormalities seen	Examination	no	Lens entry time: 4 BBPS: LC:1+TC:2+RC:2= 5 There is a lot of fecal water in the intestinal cavity, which seriously affects the observation No abnormal ileocecal valves were found in the distal ileum. The opening of the appendix was clear, and no erosion or ulcer or neoplasm was observed. The colonic mucosa was smooth, the vascular texture was clear, and the plica of semilunar was intact, and no e…											4	5	yes
95	male	Aged 80 in June		107851071	2023-11-27 10:44:00								have	have	no						Used intermittently	Follow-up for history of colon cancer/polyps			Colonoscopy (general)	Terminal ileum polyp, cold excision Postoperative colon	Endoscopy room 7	Colonic polyps	Treatment (EMR)	(Terminal ileum) tubular adenoma, GII	Entry time: 3BBPS: LC:2+TC:3+RC:2= 7 There was an Is polyp, about 0.8cm in size, with smooth surface and slightly red color. After ligation of the root of the polyp by snare, the polyp was removed cold. There was no residue at the broken end, no bleeding, the ileocecal valve was lip-shaped, the opening of the appendix was clear, no erosion and ulceration or new growth was observed. There was no e…	Terminal ileum	Tubular adenoma									3	7	yes
96	female	Aged 80 in June		124985730	2022-05-17 11:41:00				have				have	have	no						Currently taking	anemia			Colonoscopy (general)	The nature of ascending colon cancer is to be determined It may be malignant Multiple polyps of the colon Poor bowel preparation	Endoscopy room 1	Colon cancer, polyps	Examination	(Ascending colon) tubular adenocarcinoma	Entry time: 4BBPS: LC:2+TC:2+RC:2=6, influence observation The ileocecal valve was lip-shaped, and the orifice of the valve was compressed. It was difficult to enter the endoscope. A circumferential raised mass (6cm in length) was found at the beginning of the ascending colon. There was spontaneous bleeding, and the biopsy was leathery and poorly elastic. One Is polyp was found in the transverse …	l	Adenocarcinoma	Transverse 1		Sigmoid 2						4	6	yes
97	male	80 years, 7 days		105985129	2022-05-18 09:15:00	Never smoked	Never drank alcohol						have	no	have							Change in bowel habits			Colonoscopy (general)	Melanosis of the colon	Endoscopy room 3	Melanosis	Examination	no	Lens entry time: 23BBPS: LC:2+TC:2+RC:2= 6 The hook draw method was used to enter the lens through the cavity 85cm to the end of the ileum, the ileocecal valve was lip-shaped, the opening of the appendix was clear, and no erosion or ulcer or neoplasm was observed in the end of the ileum. The colonic mucosa was smooth, the tapped-like vascular texture was changed, and the plica of semilunaris was …											#VALUE!	6	yes
98	female	80 in August	1142343		2023-09-21 14:30:00	Never smoked	Never drank alcohol	no		3.24	1.2	2.01	have	have	have	7.5	155	45			Currently taking	anemia	No complications	Survival	Colonoscopy (general)	Colonic polyps Edema of the colonic mucosa	Endoscopy room 6	Colonic polyps	Examination	no	Entry time: 18 BBPS: LC:2+TC:2+RC:2= 6 The ileocecal valve was lip-shaped, the opening of the appendix was clear, and no erosion or ulceration or new growth was observed. The colonic mucosa was edema and easy to hemorrhage in contact. A 0.7 cMISP-type polyp was seen in the hepatic flexure, and the surface mucosa was smooth											#VALUE!	6	yes
99	female	80 in August	1141690		2023-12-26 11:49:00	Never smoked	Never drank alcohol	no		3.29	0.74	1.82	no	have	no		155	59		IV	Used intermittently	hematochezia	No complications	Survival	Colonoscopy (general)	Sigmoid colon bulge Cancer? With incomplete obstruction?	Endoscopy room 1	Colon cancer	Examination	Metaplastic adenocarcinoma (sigmoid colon) Immunohistochemical results: CK7 (-), CK20 (+), CDX-2 (+), SATB2 (+), Her-2 (1+), MLH1 (+), MSH2 (+), MSH6 (+), PMS2 (+), P53 (-), Ki-67 (hot area 70%+), CK (+)	Entry time: 1BBPS: LC:2 An irregular bulging nodule with blood moss on its surface was found. The intestinal lumen was narrow, and the endoscope could not pass through. The intestinal wall was stiff, peristalsis disappeared, the biopsy was friable and easy to bleed	Sigmoid colon	Moderately differentiated adenocarcinoma was observed									1	2	Intestinal obstruction
100	female	80 in August	1073989		2023-05-08 12:14:00	Never smoked	Never drank alcohol	no	have	4.82	1.18	2.7	no	no	have	7.2	158	60		III	Used intermittently	Follow-up for history of colon cancer/polyps			Colonoscopy (painless)	No abnormalities were found in the whole colonic mucosa	Endoscopy room 5	No abnormalities seen	Examination	no	Lens entry time: 4BBPS: LC:3+TC:3+RC:3= 9 The ileocecal valve was lip-shaped, the opening of the appendix was clear, and no erosion or ulcer or neoplasm was observed. The colonic mucosa was smooth, the vascular texture was clear, and the plica of semilunaris was intact, and no erosion, ulcer or neoplasm was observed											4	9	yes
101	male	80 Sept	1123412		2022-10-17 12:54:00	Smoking now	Are drinking alcohol	no	no				no	no	no		160	67		III	Never used before.	Follow-up for history of colon cancer/polyps	No complications	Survival	Colonoscopy (painless)	Multiple polyps of the colon Electronic endoscopic colon polypectomy with snare (2 cases) 1 snare was net	Endoscopy room 5	Colonic polyps	Treatment (EMR)	1. Chronic inflammation of the mucosa (transverse colon) 2. (Transverse colon) tubular adenoma, low grade 3. (Sigmoid) tubular adenoma, low-grade	Clean the intestinal tract, lubricating the intestinal tract, electronic colonoscopy with a transparent cap at the front end, inserted into the scope from the anus time: 2BBPS: LC:2+TC:3+RC:2=7 The endoscope was inserted through the cavity to the ileocecal valve by hook method. After entering the endoscope, an ISP-type polyp was found about 90cm from the transverse colon to the anus, with a smoot…	cross	Chronic mucositis	cross	Tubular adenoma	The sigmoid colon was 1cm	Tubular adenoma					2	7	yes
102	male	80 Sept		102913376	2022-10-11 10:02:00	Never smoked	Never drank alcohol	no					no	no	no		168	61			Never used before.	Follow-up for history of colon cancer/polyps			Colonoscopy (general)	Colonic polyps, forceps clear Postoperative changes of rectum	Endoscopy room 6	Colonic polyps	Examination	(Ascending colon) inflammatory polyp	Time of entry: The ileocecal flap was lip-shaped, the opening of the appendix was clear, and no erosion and ulcer or new growth was observed. A 0.3cmIs polyp was seen in the ascending colon, the surface mucosa was smooth, and the biopsy forceps were clean. There was no hyperemia, erosion, or neoplasm. The colonic mucosa was smooth, the vascular texture was clear, the plica was intact, and there w…	l	Inflammatory polyps									6	Cleanliness grade 3	yes
103	male	80 Sept		100547194	2022-06-16 10:06:00								have	have	have						Never used before.	hematochezia			Colonoscopy (general)	Rectal polyps Cold resection Multiple diverticula of the colon Poor bowel preparation	Endoscopy room 6	Rectal polyps, diverticula	Treatment	(Rectal) tubular adenoma, low grade	Entry time: 15BBPS: LC:2+TC:2+RC:1=5 The ileocecal flap was lip-shaped, the opening of the appendix was clear, and several diverticula were scattered in the ascending colon. The inner diameter was about 0.5-1.0cm. There was fecal water retention at the base. No active bleeding was observed. The remaining colon mucosa was smooth, the vascular texture was clear, the plica of semilunar was intact, a…	Rectum	Tubular adenoma									15	5	yes
104	female	81	1109344		2022-01-20 11:52:00	Never smoked	Never drank alcohol	no					no	no	have		150	50		III	Never used before.	Abdominal pain or distension			Colonoscopy (painless)	Multiple polyps in the colon Clamp clear Multiple diverticula in colon	Endoscopy Room 2		Examination	Transverse: tubular adenoma, descending: tubular adenoma	Entry time: 7BBPS: LC:2+TC:3+RC:3= 8 The ileocecal flap was lip-shaped, and the opening of the appendix was clear. There was no erosion, ulcer or neoplasm. One Is polyp was found in the transverse colon and descending colon, 0.4 cm and 0.5cm in size, respectively, with smooth surface and similar color. There was no surrounding redness and swelling. The remaining colonic mucosa was smooth, the vas…	cross	Tubular adenoma	Descending colon	Tubular adenoma							7	8	yes
105	male	81	1107963		2021-12-24 14:24:00	Has quit smoking	Are drinking alcohol	no	have	5.24	1.31	3.5	have	no	no	5.6	172	73		II	Never used before.	Abdominal pain or distension	No complications	Survival	Colonoscopy (painless)	No abnormalities were found in the whole colonic mucosa	Endoscopy room 3		Examination	no	Lens entry time: 5 Ottawa review: R:2+M:2+R-S:2+ liquid :1= 7 The scope was inserted 80cm through the lumen to the end of the ileum by the hook method. The ileocecal valve was lip-shaped, the opening of the appendix was clear, and no erosion or ulcer or neoplasm was observed in the end of the ileum											5	Ottawa 7	yes
106	female	81	1102111		2021-09-09 10:34:00	Never smoked	Never drank alcohol	no	have				have	no	no		157	60		II	Never used before.	Follow-up for history of colon cancer/polyps			Colonoscopy (painless)	Colonic diverticulum Colonic polyps Clamp clean	Endoscopy Room 4		Examination	Chronic inflammation of the mucous membrane (hepatic flexure) with interstitial edema	Time of entry: 5 Intestinal cleanliness grade 2 A diverticulum with the size of 0.3x0.5cm was found above the ileocecal flap without erosion or bleeding. An Is polyp with the size of 0.3cmx0.3cm was found about 60cm from the hepatic flexure of transverse colon to the anus, with smooth surface and similar color	Hepatic flexure	Chronic mucositis									5	2	yes
107	female	81	1101483		2021-08-26 10:20:00	Never smoked	Never drank alcohol	no	have	4.45	0.92	2.95	have	no	have	6.7	150	49		II	Never used before.	abdominal mass			Colonoscopy (painless)	Cecal cancer?	Endoscopy room 1		Examination	Adenocarcinoma	Entry time: 4 Intestinal cleanliness grade 3 There was no obvious abnormality in the mucosa of the terminal ileum. The ileocecal valve was lip-shaped. There was a mass in the cecum, about 4cm*3.0cm in size, with unclear boundary, central depression, dirty surface, edema of the surrounding mucosa, and unclear appendiceal opening. The remaining colonic mucosa was smooth, the vascular texture was cl…	Ascending colon	Adenocarcinoma									4	3	yes
108	male	81	1101300		2021-12-03 15:13:00	Smoking now	Are drinking alcohol	no		3.31	0.77	1.94	have	no	no	5.8	158	50		II	Never used before.	Change in bowel habits			Colonoscopy (painless)	Rectal cancer	Endoscopy Room 2		Examination	Adenocarcinoma	A circular mass covered with dirty yellow and white moss was found 8cm from the rectum to the anus. The boundary was clear, the lumen was narrow, the endoscope could not pass through, the mucosa was crisp, and no obvious abnormality was found in the remaining colon segment	Rectum	Adenocarcinoma									Failure	Data missing	Intestinal obstruction
109	female	81	1100809		2017-01-10 11:44:00	Never smoked	Never drank alcohol	no	have	3.64	0.69	1.26	have	no	no		153	56		II	Currently taking	Change in bowel habits			Colonoscopy (general)	Melanosis of the colon	Endoscopy room 7		Examination	no	Lens entry time: 6 Intestinal cleanliness grade 1 The ileocecal valve was lip-shaped, the opening of the appendix was clear, and no erosion or ulcer or neoplasm was observed. The colon mucosa showed a light brown tapped-like change, and the semilunar fold was intact, without erosion, ulcer or neoplasm											6	1	yes
110	female	81	1093312		2021-12-13 15:02:00	Never smoked	Never drank alcohol	no	have	3.04	1.24	1.6	have	have	no	6.1	166	70			Used intermittently	hematochezia			Colonoscopy (general)	No abnormalities were found in the whole colonic mucosa Hemorrhoids	Endoscopy room 3		Examination	no	Entry time: 6 Bowel cleanliness grade 2-3 No obvious abnormalities were found in the terminal ileum. The ileocecal valve was lip-shaped, the opening of the appendix was clear, no erosion or ulceration or new growth was observed. The colonic mucosa was smooth, the vascular texture was clear, the plica of semilunaris was intact, and no erosion, ulceration or new growth was observed											6	3	yes
111	male	81	1091255		2021-02-08 14:59:00	Has quit smoking	Are drinking alcohol	no	have	3.03	0.69	1.3	have	no	have	6.2	172	68		II	Used intermittently	Follow-up for history of colon cancer/polyps			Colonoscopy (painless)	Multiple polyps in the colon Electronic endoscopic colon polyp suction snare resection (EMR 1), cold resection (CSP 2) Multiple diverticula in the colon	Endoscopy Room 4		Treatment (EMR)	Tubular adenoma (cecal), low grade (hepatic flexure) tubular adenoma, low grade (Sigmoid) tubular adenoma, low grade	The electronic colonoscopy with a transparent cap on the front end was inserted into the scope from the anus. Time: 4 Intestinal cleanliness grade 2 Multiple diverticula with a size of 0.3-0.5cm were found in the ascending colon. The ileocecal flap was lip-shaped, and no abnormality was found in the appendix. A polyp with a size of 0.7*0.8cmIs was observed on the opposite side of the cecal ileoce…	3.	Tubular adenoma									4	2	yes
112	female	81	1082548		2020-08-21 14:22:00	Never smoked	Never drank alcohol	no	have	3.62	0.8	2.02	have	have	no		158	50		II	Used intermittently	Abdominal pain or distension			Colonoscopy (painless)	Edema of the wall of the sigmoid colon Multiple diverticula ischemia in the colon	Endoscopy Room 4		Examination	In the superficial colonic mucosa, glandular atrophy, interstitial edema and hyaline degeneration, and fibrous tissue hyperplasia are suggestive of ischemic changes	Entry time: 4 Intestinal cleanliness grade 3 There was no obvious abnormality in the terminal ileum. The ileocecal valve was lip-shaped, the appendix opening was clear, there was no erosion and ulceration or new growth. There were multiple diverticula, the size of the opening was about 0.3-0.5cm, the bottom of the diverticula was deep, and a small amount of feces was left. Biopsy of one biopsy sp…											4	3	yes
113	female	81	1081293		2020-07-23 10:00:00	Never smoked	Never drank alcohol	no	have				have	no	no		150	40		III		loss of weight			Colonoscopy (painless)	Colon polyps: SSAP? (Cold excision)	Endoscopy Room 4		Treatment (EMR)	Hyperplastic polyps	Entry time: 4 Bowel cleanliness grade 2 A 0.8*0.6cmIs polyp was found in the ascending colon near the ileocecal junction. The surface was smooth, and the opening of the gland tube was II-O type. There was a cumulus-like mucus cap on the surface. The broken end was clean, and the specimens were taken out for pathological examination. The colonic mucosa was smooth, the vascular texture was clear, a…	l	Hyperplastic polyps									4	2	yes
114	female	81	1080347		2020-05-22 11:18:00	Never smoked	Never drank alcohol	no	have	6.16	1.22	3.76	have	have	no	5.7	154	45		II	Currently taking	hematochezia			Colonoscopy (painless)	Multiple polyps in colon (1 LST)	Endoscopy room 1		Examination	Cecum: villous tubular adenoma, ascending: chronic inflammation of mucosa, ascending: sessile serrated adenoma. Transverse, transverse, descending, descending: tubular adenoma. Sigmoid: tubular villous adenoma. Rectum: chronic inflammation of the mucosa	The time of entering the endoscope was 17. Intestinal cleanliness was grade 4 The ileocecal valve was lip-shaped, the opening of the appendix was clear, no erosion and ulceration were observed. There was a lateral growth polyp (1.2x1.5cm) in the cecum with granular surface and the color was the same as the surrounding. In type IIIL, one polyp was found in the middle of the transverse colon and th…	blind	Villous tubular adenoma	l	Sessile serrated adenoma	4 go sideways	Tubular adenoma	Sigmoid colon	Villous tubular adenoma			17	4	yes
115	male	81	1079562		2020-05-29 14:30:00	Smoking now	Has stopped drinking	no	have	3.21	1.07	1.81	have	no	no		175	74		III	Currently taking	Abdominal pain or distension			Colonoscopy (painless)	Multiple polyps in the colon Endoscopic high frequency electrocoagulation (EMR, 1 polyp), cold resection (CSP, 1 polyp), forceps net (2 polyps) Melanosis of the colon	Endoscopy room 5		Treatment (EMR)	(Ascending colon) tubular adenoma, low-grade melanosis (transverse colon) tubular adenoma, low-grade melanosis (transverse colon) melanosis of the intestine	Time of endoscopy entry: 8. Intestinal cleanliness was grade 4, there was a lot of fecal water in the intestinal cavity, and the observation of the intestinal mucosa was unsatisfactory There was no abnormality in the mucosa of the terminal ileum. The ileocecal valve was lip-shaped, the opening of the appendix was clear, and there was no erosion, ulcer or neoplasm. A LST was seen in the ascending …	L 1.5cm	Tubular adenoma	3 transverse ones	Tubular adenoma							8	4	yes
116	female	81	1079004		2020-05-13 12:14:00	Never smoked	Never drank alcohol	no	no	3.38	0.74	2.3	have	no	no		156	58		III	Never used before.	Change in bowel habits			Colonoscopy (general)	Bowel preparation was not performed Rectal strictures	Endoscopy room 7		Examination	(rectum) colonic mucosal tissue, accompanied by melanosis, the mucosa seems to have atrophic changes, please combine with clinical	Two biopsies were taken from the stenosed area, and the texture was still soft. The gastroscope could pass, but a large amount of feces could be seen 20cm into the scope, which could not be observed											Failure	5	Intestinal obstruction
117	male	81	1078986		2020-04-23 10:57:00	Never smoked	Never drank alcohol	no	no	4.11	1.86	2.48	have	no	no		174	90		II	Never used before.	hematochezia			Colonoscopy (painless)	After ileocolic anastomosis Multiple colonic polyps were found, and a partial clamp was removed The nature of ascending colon polyps remains to be determined. Pathology and EMR are recommended for treatment Transverse colon and sigmoid colon polyps are recommended to be treated with EMR Edematous mucosa of the descending B junction -- ischemic colitis must be excluded	Endoscopy room 3		Examination	Ascending: villous tubular adenoma. Transverse: tubular adenoma, sigmoid: chronic mucosal inflammation. Sigmoid: tubular adenoma	Entry time: 6 Bowel cleanliness grade 2 No abnormality was found in the mucosa of the terminal ileum. Ileocolonic anastomosis was found in the ileocecal region, and no abnormality was found in the appendiceal orifice. At the beginning of the ascending colon, an Yamada type II polyp was found. A flat protuberant polyp was found in the transverse colon near the hepatic flexle, 0.8*0.6cm with smooth…	l	Villous tubular adenoma	cross	Tubular adenoma	Sigmoid colon	Tubular adenoma					6	2	yes
118	male	81	1074706		2019-12-05 15:31:00	Never smoked	Never drank alcohol	no	no	2.81	3.22	1.31	no	no	no		170	65		II	Never used before.	Change in bowel habits			Colonoscopy (general)	Multiple polyps in colon, to be removed	Endoscopy room 7		Examination	1 (appendiceal) tubular adenoma, low grade; 2 (LST specimen of transverse colon) sessile serrated adenoma, microscopically measuring 2.4 × 1.5cm; 3 (descending colon) tubular adenoma, low-grade	Lens entry time: 20 intestinal cleanliness grade 4 The solid feces scattered in the intestinal cavity, which covered the mucosa, affected the observation of the ileocecal valve was lip-shaped. The opening of the appendix was clear, and there was a LST (about 1.0cm) next to the opening of the appendix, and the surface was slightly lobed. There was an IS-like polyp (0.6cm in diameter) in the descen…	Cecum	Tubular adenoma	cross	Sessile serrated lesions were seen	drop	Tubular adenoma					20	4	yes
119	female	81	1071423		2019-11-14 14:34:00	Never smoked	Never drank alcohol	no	no	3.51	1.02	2.13	no	no	no		156	58		II	Never used before.	Abdominal pain or distension			Colonoscopy (painless)	Segmental inflammation of the sigmoid colon and rectum With erosion and ulcer formation, Ischemia? Infection? Rectal polyp, clamp clear Inflammatory?	Endoscopy room 3		Examination	Sigmoid: normal mucosal tissue, rectum: mucosal tissue, some areas of scarring with ulcer formation, suggesting ischemic changes.	Entry time: 5 Intestinal cleanliness grade 2 No abnormal ileocecal valve was lip-shaped, the opening of the appendix was clear, no erosion and ulcer or new growth was observed. The colon lumen was unblocked, and the segmental mucosa of sigmoid colon was patchy erythema, congestion and edema, and no obvious erosion and ulcer was observed about 35cm from the anus. In the rectum, there were scattere…											5	2	yes
120	male	81	1063027		2019-06-20 15:49:00	Never smoked	Never drank alcohol	no	no	3.92	1.14	2.24	have	no	no	5.7	178	81		III	Never used before.	hematochezia			Colonoscopy (painless)	Multiple polyps in the colon Colon mass cancer	Endoscopy room 1		Examination	(Appendix ostium) Tubular adenoma, low grade Adenocarcinoma, intermediate. X000d_	Entry time: 6 Intestinal cleanliness 4 Grade Multiple ISP-type polyps with a size of 0.2-0.4cm and a smooth surface were found in the appendiceal orifice. Biopsy forceps removed one ISP-type polyp with a size of 0.5cmx0.5cm and a smooth surface and a similar color to the surrounding, and another ISP-type polyp was found in the ascending colon. One ISP-type polyp, 0.3cmx0.5cm in size, smooth surfa…	Cecum	Tubular adenoma	Rectum	Adenocarcinoma							6	4	yes
121	male	81	1060602		2019-05-13 15:13:00	Never smoked	Never drank alcohol	no	no	3.54	0.87	2.05	have	have	no	6.3	172	55		III	Currently taking	Follow-up for history of colon cancer/polyps			Colonoscopy (general)	Rectal surgery Colitis	Endoscopy room 5		Examination	no	A stoma was seen in the abdominal wall and the bowel was clear In grade 5, the mucous membrane of sigmoid colon and sigmoid colon was smooth, the vascular texture was not clear, and the semilunar fold was intact. The anastomotic nail was seen 10cm away from the anus when the endoscope was not continued, and the surrounding feces was covered, which could not be washed and observed. There were no e…											Failure	5	yes
122	female	81	1057281		2019-03-19 14:24:00	Never smoked	Never drank alcohol	no	have	5.37	0.67	2.93	have	no	no		150	50		III	Never used before.	hematochezia			Colonoscopy (painless)	Total colonic mucosa No abnormalities were seen.	Endoscopy room 3		Examination	no	Lens entry time: 4 intestinal clearance Degree of cleanliness 2 The ileocecal valve was lip-shaped, the opening of the appendix was clear, and no erosion, ulcer or neoplasm was observed. The colonic mucosa was smooth, the vascular texture was clear, and the plica of semilunaris was intact. No erosion, ulcer or neoplasm was observed											4	2	yes
123	male	81	1056315		2019-02-28 16:24:00	Has quit smoking	Never drank alcohol	no	have	3.19	0.77	1.72	have	have	no			75			Currently taking	Follow-up for history of colon cancer/polyps			Colonoscopy (general)	Multiple colon polyps One was resected by electric resection (EMR), 3 by cold resection (CSP), and the remaining forceps were net	Endoscopy room 5		Treatment (EMR)	Ascending: chronic mucosal inflammation; hepatic flexure 1, 2, 3: tubular adenoma; transverse: inflammation	Entry time: 6 intestinal cleansing Degree 4 In the ascending colon, 4 ISP-type polyps (0.3cm-0.5cm in size) with smooth surface and similar color without erosion were observed. In the clear hepatic flexure of the biopsy forceps, 1 ISP-type polyp (0.6cm in size) with lobar surface and similar color without erosion was observed. 1 ISP polyp, about 0.6 cm in size, with surface lobe and color around,…	3 hepatic flexure	Tubular adenoma									6	4	yes
124	male	81	1042870		2018-07-17 17:17:00	Never smoked	Never drank alcohol	no	no	3.16	0.94	2.1	have	no	no		168	47		III	Never used before.	anemia			Colonoscopy (painless)	No abnormalities were found in the colonic mucosa	Endoscopy room 1		Examination	no	Lens entry time: 8 Intestinal cleanliness level 4 The ileocecal valve was lip-shaped, the opening of the appendix was clear, and there was no erosion or ulceration or neoplasm. The observation was not satisfactory. The colonic mucosa was smooth, the vascular texture was clear, and the plica of semilunar was intact, without erosion, ulceration or neoplasm											8	4	yes
125	male	81	1037890		2018-05-02 10:42:00	Never smoked	Never drank alcohol	no	have	4.51	2.98	2.19	have	no	no		169	72		III	Currently taking	hematochezia			Colonoscopy (painless)	Multiple polyps in colon to be removed Rectal bulge, pending pathology Internal hemorrhoids	Endoscopy room 3	SARS hyperplasia	Examination	(Rectum) examination of a small amount of squamous epithelium and colonic mucosa, abnormal blood vessels of different sizes in the submucosal stroma, individual lumen thrombosis, accompanied by hemorrhage, necrosis, fibrous tissue hyperplasia and inflammatory cell infiltration, secondary changes of hemorrhoids, isolated scattered glands mild atypical hyperplasia, may be accompanied by tubular ade…	Entry time: 29 bowel Tract cleanliness grade 3 The ileocecal flap was lip-shaped and the opening of the appendix was clear. There was no erosion and ulceration or new growth. An IS-like polyp with a size of 0.9*0.6cm was seen in the ileocecal region, with a smooth surface and the same color as the surrounding. 0.5*0.5cm, smooth surface, similar color to the surrounding, There was an Is type polyp…	2 caecum	Tubular adenoma	l	Tubular adenoma	Hepatic flexure	Tubular adenoma	cross	Tubular adenoma			29	3	yes
126	female	81	1036542		2021-05-26 15:34:00	Never smoked	Never drank alcohol	no	have	3.58	2.05	1.75	no	no	no	6.3	150	52		II	Never used before.	Follow-up for history of colon cancer/polyps			Colonoscopy (painless)	Ileocecal valve bulge - lipoma possible	Endoscopy Room 2		Examination	no	Entry time: 6 Intestinal cleanliness grade 3-4 The ileocecal flap was lip-shaped, and a hemispherical bulge (1.0cm in diameter) on the lower lip was observed. The surface was smooth and soft. The opening of the appendix was clear, and no erosion or ulcer or neoplasm was observed											6	4	yes
127	female	81	1025604		2017-08-08 12:33:00	Never smoked	Never drank alcohol	no	no	5.49	0.86	3.12	have	have	no		160	60		II	Never used before.	Change in bowel habits			Colonoscopy (painless)	Multiple colon polyps Three were clipped and two were to be resected by electrotomy Melanosis of colon	Endoscopy room 9		Examination	1 (25cm sigmoid colon) tubular adenoma, low grade, melanosis; 2 (sigmoid colon 30cm) tubular adenoma, low grade; 3 (sigmoid colon 22cm) hyperplastic polyp, melanosis; 4 (sigmoid colon 20cm) consistent with tubular adenoma, low grade	Entry time: 6 Bowel cleanliness grade 3 Two Yamada type II polyps (0.3cmx0.3cm in size) with smooth surface and no erosion were found in the ascending colon 80cm from the anus. One Yamada type II polyp (0.4cmx0.4cm in size) was found in the transverse colon 65cm from the anus. Two Yamada type I polyps (0.6cm and 1.0cm in diameter) were found in the sigmoid colon at a distance of 25cm from the anu…	There were 3 sigmoid colon	Tubular adenoma	Sigmoid colon	Hyperplastic polyps							6	3	yes
128	male	81	1022724		2018-12-04 12:16:00	Never smoked	Never drank alcohol	no	have	2.93	0.75	1.38	have	no	no		168	68		III	Never used before.	Follow-up for history of colon cancer/polyps			Colonoscopy (painless)	Colonic polyps, multiple Cold resection	Endoscopy room 3		Treatment (EMR)	1(ascending colon) tubular adenoma, low grade 2(ascending colon) tubular adenoma, low-grade 3(ascending colon) tubular adenoma, low-grade 4(ascending colon) tubular adenoma, low-grade 5(ascending colon) tubular adenoma, low-grade 6(transverse colon) chronic inflammation of the polypoid colonic mucosa 7(sigmoid colon) tubular adenoma, low-grade	Entry time: 15 Bowel cleanliness grade 2 The ileocecal flap was lip-shaped, the opening of the appendix was clear, and there was no erosion and ulceration or neoplasm. Five polyps were found in the ascending colon. They were Yamada type II-III, ranging in size from 0.6 to 0.8cm, with smooth surface mucosa. Yamada Type II to III, about 0.5-0.8cm in size, smooth surface mucosa, no bleeding was obse…	Ascending 5	Tubular adenoma	Sigmoid colon	Tubular adenoma	Transverse colon	Chronic mucositis					15	2	yes
129	female	81	1020630		2020-11-16 14:58:00	Never smoked	Never drank alcohol	no	have	6.01	1.22	4.15	have	have	no	6	154	50		II	Used intermittently	Follow-up for history of colon cancer/polyps			Colonoscopy (painless)	For multiple colon polyps, 1 was clipped and the remaining 1 was to be resected by electrotomy Rectal changes after operation were Melanosis of colon Poor bowel preparation	Endoscopy room 5		Examination	Tubular adenoma (transverse colon), low grade	Time of entering the lens: 7 Intestinal cleanliness was grade 4, and there were many intestinal stools, which affected the observation A large amount of solid stool was seen in the ascending colon, and a polyp of about 0.4cmIs with smooth surface mucosa was seen in the transverse colon. A polyp of about 1.0*1.0cmIs with smooth surface mucosa and similar color was seen 16cm away from the anus. The…	cross	Tubular adenoma	l	Tubular adenoma	Sigmoid colon	Tubular adenoma					7	4	yes
130	female	81	1014758		2016-12-08 13:47:00	Never smoked	Never drank alcohol	no	no	4.56	0.5	2.16	no	no	no		162	60			Currently taking	abdominal mass			Colonoscopy (general)	Multiple polyps in the colon, LST of colon Rectal ulcers	Endoscopy room 7		Examination	1. Sessile serrated adenoma (ascending colon) with clear margin. Immunohistochemical staining showed Ki-67,P53,MLH1, MSH2, MSH6, PMS2, and HE 2. (Transverse colon) chronic polypoid mucositis (Rectal) villous tubular adenoma, low grade, clear margin immunohistochemical staining Ki-67,P53,MLH1, MSH2, MSH6, PMS2, HE	There was blood on the finger sleeve during anal examination, and the time of endoscopy entry was 20 years. Intestinal cleanliness was grade 2 A longitudinal mucosal ulcer of about 1.5cm in length was found near the anal opening of the rectum, covered with blood scabbed on the surface, and the surrounding mucosa was slightly hyperemia and edema. A 3cm Yamada-type II polyp was seen 12cm away from …	l	Sessile serrated lesions were seen	cross	Chronic mucositis	Rectum	Villous tubular adenoma					20	2	yes
131	male	81	1014073		2016-11-17 10:57:00	Smoking now	Are drinking alcohol	no	have	5.03	0.94	3.24	have	no	have	8.2	174	76			Currently taking	Follow-up for history of colon cancer/polyps			Colonoscopy (general)	Colonic polyps Electrocision	Painless examination room			1. (Ascending colon 1, ESD) tubular adenoma, high grade, located in the superficial layer of the mucosa, low grade in the deep layer, the maximum diameter of the tumor was 1.2cm, and the net distance from the resection margin was 0.2cm 2. (Descending colon 2, ESD) tubular adenoma, low grade, maximum diameter of tumor 1.2cm, clear margin 3. (Transverse colon) tubular adenoma, low grade, with clear…	Entry time: 4 Rectal examination showed negative bowel cleanliness of grade 3 Lst-type polyp was successfully seen in the ascending colon. The size was 1.5cmx1.2cm, the surface was smooth, the texture was soft, and there was no white spot at the root. 0.005% epinephrine saline was injected into the root. High frequency electric resection with endocut mode was used to clean the broken end, and the…	Ascending ESD	Tubular adenoma	Descending colon ESD	Tubular adenoma	cross	Tubular adenoma	There were 3 sigmoid colon	Tubular adenoma			4	3	yes
132	male	81	1013955		2016-11-01 11:26:00	Smoking now	Are drinking alcohol	no	no	3.21	0.78	1.66	no	no	no		164	74		II	Never used before.	Follow-up for history of colon cancer/polyps			Colonoscopy (general)	Multiple colon polyps Two were clipped and one was to be transurethral resection Multiple diverticula in the colon	Endoscopy room 7		Examination	1. (Ascending colon near hepatic flexure) Tubular adenoma, low grade (2) Tubular adenoma (proximal hepatic flexure), low-grade immunohistochemical staining Ki-67,P53,MLH1, MSH2, MSH6, PMS2	Entry time: 4 Intestinal cleanliness grade 2 Yamada type I polyp, 0.4cmx1.0cm in size, was found in the transverse colon 60cm from the hepatic flexure to the anus. The surface was smooth and the color was the same as the surrounding. There was no erosion of the polyp tube opening round. No erosion and congestion was observed. Yamada type I polyp was found 25cm from the rectum to the anus, 0.3cmx0…	l	Tubular adenoma	l	Tubular adenoma							4	2	yes
133	female	81	1013239		2016-11-23 10:09:00	Never smoked	Never drank alcohol	no	have	3.56	2	2.01	have	no	have	6.4	154	59			Never used before.	Change in bowel habits			Colonoscopy (general)	Multiple polyps in the colon Two were clipped and the other two were to be resected by electrotomy	Endoscopy room 1		Examination	1. (Ascending colon 1) Tubular adenoma, low grade recommended immunohistochemical markers Ki-67,P53,MLH1, MSH2, MSH6, PMS 2. (Ascending colon 2) Tubular adenoma, low grade	Entry time: 5 Bowel cleanliness grade 2 A Yamada type II polyp, 0.3cmx0.3cm in size, with a smooth surface and the same color as the surrounding tissue, without erosion, was found in the appendiceal orifice 75cm from the anus. A Yamada type II polyp, 0.4cmx0.4cm in size, with a smooth surface, was found in the ascending colon 70cm from the anus. Yamada type I polyp was found 70cm from the ascendi…	l	Tubular adenoma	2 liters	Tubular adenoma	L 1cm	Tubular adenoma	Sigmoid colon 0.8 cm	Tubular adenoma			5	2	yes
134	female	81	1011848		2018-08-01 15:35:00	Never smoked	Never drank alcohol	no	have	5.52	1.03	3.77	have	no	no		159	66		II	Never used before.	Change in bowel habits			Colonoscopy (painless)	Multiple polyps of colon, Cold resection, forceps net, 1 to be transurethral resection Multiple mucosal protrusions of the colon, lipoma possible External piles	Endoscopy room 1		Examination	1 (ascending colon) consistent with tubular adenoma, low grade 2 (transverse colon) consistent with tubular adenoma, low-grade 3 (transverse colon) tubular adenoma, low-grade 4 (transverse colon) chronic inflammation of the polypoid colonic mucosa 5 (transverse colon) chronic polypoid intestinal mucositis 6 (descending colon) Tubular adenoma, low-grade 7 (sigmoid colon) chronic inflammation of th…	Entry time: 16 intestinal clearance Cleanliness grade 1 The ileocecal flap was lip-shaped and the opening of the appendix was clear without erosion or ulceration or neoplasm. A mucosal bulge with yellow surface, 1.0-1.4cm in diameter and soft to palpation, was found in the ileocecal region and the beginning of the ascending colon. Large cases were treated with cold snare, while small cases were t…	l	Tubular adenoma	3 transverse colons	Tubular adenoma							16	1	yes
135	female	81	1006208		2017-08-24 14:12:00	Never smoked	Never drank alcohol	no	have	4.78	0.81	2.08	no	have	no		144	52		III	Used intermittently	Abdominal pain or distension			Colonoscopy (painless)	Multiple diverticula in the colon	Endoscopy room 10		Examination	no	Entry time: 12 Intestinal cleanliness level 2 The ileocecal valve was lip-shaped, the opening of the appendix was clear, and no erosion or ulcer or neoplasm was observed. Multiple diverticula were observed in the ascending colon. The diameter of the mouth was 0.5-0.8cm, and the wall of diverticulum was smooth											#VALUE!	2	yes
136	male	81	1004022		2016-01-11 15:31:00	Never smoked	Never drank alcohol	no	have	2.54	0.81	1.29	have	have	no		165	65			Currently taking	loss of weight			Colonoscopy (general)	Colonic polyps Transurethral resection Biopsy :[1] 2 pieces of ascending colon; [2] transverse colon 1; [3] Rectum 1;	Endoscopy Room 2			Ascending, transverse, and straight: tubular adenoma	Digital examination of the anus was negative The endoscope was inserted 70cm through the lumen to the end of the ileum by hook method. The ileocecal flap was lip-shaped and the opening of the appendix was clear. There was a polyp in the ascending colon, Yamada type I, about 0.5cm in size, with a lobed surface mucosa. The size of the polyp was about 1.0cm, and the surface mucosa was lobulated. 0.0…	l	Tubular adenoma	cross	Tubular adenoma	1cm straight	Tubular adenoma					Data missing	Data missing	yes
137	male	81		101213740	2020-06-16 11:42:00	Has quit smoking	Never drank alcohol	no	no	4.9	0.43	3.38	no	no	no		169	56		II	Never used before.	Change in bowel habits			Colonoscopy (painless)	Colonic polyp, forceps net	Endoscopy room 1		Examination	Tubular adenoma (descending colon), low grade	Entry time: 3 Bowel cleanliness grade 2 Hook rafa follow cavity into the mirror to the terminal ileum, into the mirror owe smoothly terminal ileum not seen obvious abnormal back to the blind is lip, appendix openings clear, did not see erosion ulcer and new biological descending colon polyp see one Isp type, size is about 0.6 cm, smooth surface, color with the surrounding, biopsy, soft net pliers…	drop	Tubular adenoma									3	2	yes
138	male	81		115549120	2017-03-08 09:57:00	Never smoked	Never drank alcohol	no	have	2.59	0.49	1.1	no	no	no		169	67			Used intermittently	Follow-up for history of colon cancer/polyps			Colonoscopy (general)	Colonic polyps Erosive inflammation of the cecum?	Endoscopy room 8		Examination	Chronic inflammation of the polypoid colonic mucosa	Entry time: 4 Intestinal cleanliness grade 2 The endoscope was inserted 70cm through the cavity to the end of the ileum by hook method. The ileocecal valve was lip-shaped, and there was erosion around the opening of the appendix, about 0.4cm in size, and congestion and edema around it. The surface mucosa of the ascending colon was smooth, the vascular texture was clear, the plica of semilunar was…	l	Tubular adenoma	l	Chronic mucositis	l	Tubular adenoma					4	2	yes
139	female	81		112666934	2021-12-28 09:14:00	Never smoked	Never drank alcohol	no	no	3 9	0.94	1.86	have	no	no		155	50		II	Never used before.	Elevated tumor markers			Colonoscopy (painless)	Colonic polyposis - Clamp clean	Endoscopy Room 2		Examination	(Ascending colon) consistent with an inflammatory polyp	Entry time: 6 Ottawa review: R:2+M:2+R-S:1+ fluid :2= 7 The ileocecal valve was lip-shaped, the opening of the appendix was clear, and no erosion, ulcer or neoplasm was observed. An IS-type polyp (0.4cm in diameter) was found in the middle segment of the ascending colon. The surface was slightly rough, the glandular tube structure was not clear, and the color was similar to the surrounding	l	Inflammatory polyps									6	Ottawa 7	yes
140	female	81		103023848	2017-11-07 12:53:00	Never smoked	Never drank alcohol	no	have	4.39	1.28	2.49	no	have	no		167	65.5		II	Used intermittently	Change in bowel habits			Colonoscopy (painless)	Colonic polyps Colonic diverticula External hemorrhoids	Endoscopy room 10		Examination	(Ascending colon) tubular adenoma, low grade	Entry time: 15 Intestinal cleanliness grade 2 The ileocecal flap was lip-shaped, the opening of the appendix was clear, there was no erosion, ulcer and neoplasm. There was an Is polyp in the ascending colon. The diameter of the polyp was about 0.5cm, and the color was similar to the surrounding. External hemorrhoids were found without erosion, ulceration or neoplasm	l	Tubular adenoma									15	2	yes
141	male	81		101423513	2019-06-18 11:18:00	Smoking now	Are drinking alcohol	no	have	3.11	0.67	1.18	have	no	no		160	59		II	Currently taking	Follow-up for history of colon cancer/polyps			Colonoscopy (general)	Colon laterally spreading tumor (LST) Multiple colonic polyps to be resected by transurethral resection	Endoscopy Room 4		Examination	Tubular adenoma (ascending colon), low grade (Ascending colon) tubular adenoma, low grade (transverse colon) tubular adenoma, low grade (transverse colon) tubular adenoma, low grade, clear margin (Sigmoid) tubular adenoma, low grade (Sigmoid) tubular adenoma, low-grade	Time of entry: The ileocecal flap was lip-shaped, the opening of the appendix was clearly displayed, and two adjacent IS-type polyps were seen in the hepatic flexure. The size of the polyps was 0.8cm and 1.0cm, respectively. A 1.5*1.5cmIs polyp was found 55cm from the transverse colon to the anus, with smooth surface mucosa and good inspiratory peristalsis. The polyp was observed by indigo carmin…	Ascending 2	Tubular adenoma	Transverse 2	Tubular adenoma	Sigmoid 2	Tubular adenoma					9	2	yes
142	female	81		102795660	2019-04-09 14:30:00	Never smoked	Never drank alcohol	no	have	3.98	0.9	2.28	have	have	no	7.4	157	52		II	Used intermittently	Change in bowel habits			Colonoscopy (painless)	Multiple polyps in the colon Two were cold resected and the remaining forceps were net	Endoscopy Room 2		Examination	(Ascending colon) chronic polypoid mucositis (hepatic flexure) chronic inflammation of the polypoid intestinal mucosa Tubular adenoma (transverse colon), low grade (transverse colon) tubular adenoma, low grade (Descending colon) tubular adenoma, low grade	Entry time: 10 bowel cleanliness grade 3 There was a Yamada Isp polyp (0.4cmx0.4cm in size) in the ascending colon with smooth surface and similar color without erosion. Biopsy forceps showed an Yamada ISP-type polyp (0.3cmx0.3cm in size) with smooth surface in the clear hepatic flexure. One ISP-type polyp with a size of 0.3 cmx0.3 cm and a smooth surface was observed in the clear hepatic flexure…	Ascending and hepatic flexure were observed	Chronic mucositis	2 transverse	Tubular adenoma	drop	Tubular adenoma					10	3	yes
143	male	81		124759101	2021-11-01 14:33:00				have	5.6	1.74	3.91	have									Follow-up for history of colon cancer/polyps			Colonoscopy (general)	Colonic polyps, forceps clear Postoperative colon	Endoscopy room 3		Examination	Tubular adenoma (sigmoid colon), low grade	Time of endoscopy entry: 3 Bowel cleanliness grade 3 There was no obvious abnormality in the terminal ileum. The ileocecal valve was lip-shaped, the opening of the appendix was clear, there was no erosion and ulceration and new growth. An anastomosis was found 15cm from the anus in the rectosigmoid junction, and the anastomosis was unblocked without obvious abnormalities in the mucosa. The colon …	Sigmoid colon	Tubular adenoma									3	3	yes
144	female	81		124496580	2021-11-26 10:44:00	Never smoked	Never drank alcohol	no	no	2.62	0.74	1.02	have	no	no	6.5		40				Change in bowel habits			Colonoscopy (general)	Rectal mass may be cancer	Endoscopy room 3		Examination	Tubular adenocarcinoma	A rectal circumferential mass was found 8cm into the cavity by hook pull method. The surface shape was irregular, covered with dirty yellow and white moss and feces. The boundary was clear, the surrounding mucosa was ring-like changes, the lumen was narrow, the endoscopy could not pass through, the mucosa was bad and fragile, and bleeding was easy to contact	Rectum	Adenocarcinoma									Failure	Data missing	Intestinal obstruction
145	male	81		101423222	2017-08-07 17:07:00	Never smoked	Never drank alcohol	no		4.27	0.91	3.13	have	no	no		176	64			Used intermittently	Abdominal pain or distension		Survival	Died 43 days after colonoscopy (ordinary)	Colon cancer Colon stenosis (intestinal obstruction) Colonic stent placement under DSA	ERCP		Treatment (Stent placement)	(Rectus B junction) high grade intraepithelial tumor, no muscularis mucosa, can not exclude more advanced lesions	A colonic mass was found 20cm to the straight-B junction, and the intestinal lumen was narrow, and the endoscope could not pass through. Under X-ray monitoring, a zebra guide wire was placed through the narrow segment, and the angiography catheter was passed through the narrow segment along the guide wire. A 2.2cmx6cm metal stent was inserted along the guide wire and slowly introduced into the le…	Straight B junction	Adenocarcinoma									Failure	Data missing	Intestinal obstruction
146	female	81		103827770	2018-06-15 16:43:00	Never smoked	Never drank alcohol	no	no	4.04	2.2	2.27	no	no	no		158	60		II	Never used before.	Change in bowel habits			Colonoscopy (painless)	Multiple polyps in colon, EMR Submucosal bulging of descending colon, lipoma?	Painless preparation room		Treatment (EMR)	1 (Descending B junction) tubular adenoma, low grade 2 (sigmoid colon) tubular adenoma, low-grade 3 (Rectosigmoid junction) tubular adenoma, low grade 4 (rectal) tubular adenoma, low-grade	Time to enter the endoscope: 8 bowel cleanliness grade 3 The endoscope was inserted 90cm through the lumen to the end of the ileum by hook method. No obvious abnormalities were found in the end of the ileum. The ileocecal valve was lip-shaped, the opening of the appendix was clear, no erosion and ulceration were found, and no new growth was observed. There was a 1.0cm IS-type polyp in the descend…	Descending B junction	Tubular adenoma	Sigmoid colon	Tubular adenoma	Straight B junction	Tubular adenoma	Rectum	Tubular adenoma			8	3	yes
147	male	81		2387997	2020-09-14 13:49:00					3.76	0.85	1.87	have	have	have						Used intermittently	Follow-up for history of colon cancer/polyps			Colonoscopy (general)	Multiple diverticula in colon Proctitis (with medical history, radiation proctitis?)	Endoscopy room 3	Radiation proctitis	Examination	no	Entry time: 7 Intestinal cleanliness grade 3-4 The ileocecal valve was lip-shaped, and the appendix opening was covered by feces, which affected the observation of diverticula scattered in the cecum and ascending colon, with an inner diameter of about 0.5-1.0cm. At the base, there was fecal water retention. The rectum was about 8cm away from the anus. Multiple vascular stasis, combined with medic…											7	4	yes
148	male	81		115549682	2019-12-24 14:25:00	Smoking now				4.06	1.38	2.31	no	no	no							Follow-up for history of colon cancer/polyps			Colonoscopy (general)	Multiple polyps in colon, forceps clear Colonic diverticula	Endoscopy room 8		Examination	1. Low-grade tubular adenoma (hepatic flexure) 2. (Sigmoid) low-grade tubular adenoma 3. (Rectosigmoid junction) chronic inflammation of the polypoid colon mucosa with slight serrated changes on the surface	Entry time: 5 intestinal cleanliness grade 2 There was no abnormal ileocecal valve lip-shaped at the end of the ileum, the opening of the appendix was clear, there was no erosion and ulcer or new growth in the hepatic flexure and sigmoid colon. There was an IS-type polyp, about 0.4x0.4cm in size and slightly red in color. The biopsy forceps showed a diverticulum in the ascending colon, the openin…	Hepatic flexure	Tubular adenoma	Sigmoid colon	Tubular adenoma	Straight B junction	Chronic mucositis					5	2	yes
149	male	81		1324317	2017-01-23 09:45:00	Never smoked	Never drank alcohol	no	have	2.71	3.28	0.82	have	have	have	5.7	170	66			Currently taking	Follow-up for history of colon cancer/polyps			Colonoscopy (general)	Multiple polyps in colon, forceps clear	Endoscopy room 7		Examination	1. (Hepatic flexure) consistent with hyperplastic polyps 2. (Transverse colon) tubular adenoma, low grade 3. (10cm from anus) consistent with hyperplastic polyp	Time to enter the scope: 6 Intestinal cleanliness grade 3 intestinal cavity stool, affecting observation One Yamada type I polyp (0.3-0.4cm in size) was found in the hepatic flexure, transverse colon and 10cm from the anus, respectively. The surface was smooth and the color was similar to the surrounding	Hepatic flexure and transverse colon were observed	Hyperplastic polyps	Transverse colon	Tubular adenoma							6	3	yes
150	male	81		1377009	2016-12-28 09:45:00								have	no	no						Never used before.	Positive fecal occult blood			Colonoscopy (general)	Colon diverticulum Proctitis	Endoscopy room 1		Examination	no	Entry time: 5 Bowel cleanliness grade 2 The ileocecal valve was lip-shaped and the opening of the appendix was clear. There was no erosion or ulcer or new growth in the ascending colon. The colon mucosa was smooth, the vascular texture was clear, and the plica of semilunaris was intact											5	2	yes
151	female	81		1238165	2016-07-21 11:54:00	Never smoked	Never drank alcohol	no	no	4.31	1.2	2.63	have	no	have	6.6	158	52			Never used before.	Change in bowel habits			Colonoscopy (general)	1. Colonic multiple polyps, part of the clamp net, to be cut 2. Internal hemorrhoids	Endoscopy Room 2		Examination	1. (Polyp 15cm from sigmoid colon to anus) chronic polypoid mucositis 2. (10cm from anus) chronic polypoid mucositis	Digital anal examination was negative. The time of entry was 8 hours, and the intestinal cleanliness was grade 4 A Yamada type I polyp, 0.8*0.6cm in size, was found 25cm from the anus. A Yamada type II polyp, 0.4cm from the anus, was smooth, soft, and similar in color. The biopsy forceps were clean. Two Yamada type II polyps, 0.4cm and 0.2cm in size, were seen 10cm away from the anus. They were s…	Sigmoid colon	Chronic mucositis	There were 2 sigmoid colon polyps	Hyperplastic polyps							8	4	yes
152	male	81		115327719	2021-12-20 14:23:00	Never smoked	Never drank alcohol	no	have	4.08	0.53	1.67	have	no	no		171	66		II	Never used before.	Follow-up for history of colon cancer/polyps			Colonoscopy (painless)	Colon diverticulum	Endoscopy Room 2		Examination	no	Entry time: 11 Ottawa review: R:2+M:2+R-S:2+ liquid :2= 8 The ileocecal valve was lip-shaped, the opening of the appendix was clear, and there was a diverticulum in the ascending colon. The opening was 0.5cm in size, the internal mucosa was smooth, and there was no fecal residue. The vascular texture was clear, and the plica was intact											#VALUE!	Ottawa 8	yes
153	male	81		103759846	2021-04-22 15:30:00	Never smoked	Never drank alcohol	no	have	4.51	1.71	2.29	have	have	have		173	68		II	Currently taking	Follow-up for history of colon cancer/polyps			Colonoscopy (painless)	Rectal changes after surgery	Endoscopy room 5		Examination	no	Duration of endoscopy: 2 Bowel cleanliness grade 3 The ileocecal valve was lip-shaped, the opening of the appendix was clear, and no erosion, ulcer or neoplasm was observed. The anastomotic site was found about 3cm from the anus. The surrounding mucosa was slightly swollen and red, and there was no erosion, ulcer or neoplasm. The plica of semilunaris was intact, without erosion, ulcer or neoplasm											2	3	yes
154	female	81		101417012	2019-07-29 10:07:00	Never smoked	Never drank alcohol	no	have	5.97	2.85	3.81	have	no	no		158	54			Never used before.	hematochezia			Colonoscopy (general)	Rectal polyp with bleeding Multiple polyps of the colon Melanosis of colon	Endoscopy room 5		Examination	no	Enter the mirror Time: 10 Intestinal cleanliness grade 3 Blood was found on digital examination. The scope was inserted 80cm through the cavity to the end of the ileum by hook-pull method. The ileocecal valve was lip-shaped and the opening of the appendix was clear There was one ISP-type polyp in transverse colon 50cm near splenic flexure and one ISP-type polyp in sigmoid colon 22cm near splenic …	Transverse colon	1cm	Sigmoid colon	1cm	Rectum	0.8 cm					10	3	yes
155	female	81		101426182	2019-04-03 11:12:00	Never smoked	Never drank alcohol	A first-degree relative over 60 years old was diagnosed with colorectal cancer.	have	4.91	1.72	2.36	have	have	no	6.1	155	90		II	Currently taking	Positive fecal occult blood			Colonoscopy (painless)	Colon Pending pathology Multiple polyps in the colon were removed cold	VIP Preparation Room		Check (enlarge)	Descending: villous tubular adenoma, Descending: chronic mucosal inflammation, sigmoid: tubular adenoma. Sigmoid: inflammatory polyp	The hook pull method was used to enter the endoscope through the cavity to the descending colon, node There was an ISP-type tumor about 40cm from the anus, which could not be viewed in its full shape, the size was about 2.0cmx2.5cm, the surface was leaf, the color was the same as the surrounding, no erosion was observed, white spots could be seen at the root of the polyp, and the surface was dila…	drop	Villous tubular adenoma	drop	Inflammatory polyps	Sigmoid colon	Tubular adenoma	Sigmoid colon	Chronic mucositis			Failure	Data missing	Target lesion detected
156	male	81		115327770	2018-10-10 11:42:00	Has quit smoking	Never drank alcohol	no	have	3.96	1.21	1.9	no	no	have	7.3	170	78		II	Never used before.	Change in bowel habits			Colonoscopy (painless)	Multiple polyps in colon Melanosis of colon	Endoscopy room 1		Examination	6 Tubular adenomas	Entry time: 11 Bowel cleanliness grade 3 The ileocecal valve was lip-shaped, and the opening of the appendix was clear. There was no erosion or ulceration and new growth. There were four IS-type polyps in the transverse colon and sigmoid colon, about 0.5-0.7cm in size, smooth surface, and similar color. Another ISP-type polyp was found in the descending colon, about 1.2×1.0cm in size and slightly…	Ascending and transverse 2	Chronic mucositis	cross	Tubular adenoma	5 Descending colon	Tubular adenoma					11	3	yes
157	male	81		1141018	2018-06-20 12:33:00	Has quit smoking	Never drank alcohol	no	have	4	1.56	2.48	have	have	no	5.8	165	83		II	Currently taking	hematochezia			Colonoscopy (painless)	Rectal cancer possible Multiple polyps in the colon, Elective resection	Endoscopy Room 2		Examination	Adenocarcinoma	Entry time: 4 Intestinal cleanliness grade 4 (Glycerin enema) When the scope was not continued into the transverse colon, one Isp and one Is polyp were found in the transverse colon and the rectosigmoid junction. The size was 0.6*0.6cm, the surface was smooth, and the color was the same as the surrounding. Biopsy * 2, crisp, the rest of the colonic mucosa was light The vascular texture was clear,…	Rectum	Adenocarcinoma	Transverse colon		Straight B junction						4	4	Poor bowel preparation prevented completion.
158	female	81		102294575	2018-05-16 10:10:00				have	6.65	1.71	4.77	have	no	have	6.6	150	52		II	Never used before.	Change in bowel habits			Colonoscopy (painless)	No abnormalities were found in the whole colonic mucosa	Endoscopy Room 2		Examination	no	Lens entry time: 6 Intestinal cleaning Degree 2 The endoscope was inserted 85cm through the lumen to the end of the ileum. The ileocecal valve was lip-shaped, the opening of the appendix was clear, and no erosion or ulcer or neoplasm was observed											6	2	yes
159	female	81		102108022	2018-01-24 11:07:00	Never smoked	Never drank alcohol	no	have	2.63	1.77	0.98	have	have	have	8.3	155	66			Currently taking	Elevated tumor markers			Colonoscopy (general)	Ascending colon bulge Lipomas may be large Colonic polyps To be electrocuted	Endoscopy room 7		Examination	Tubular adenoma	Mirror entry time: 10 Intestinal cleanliness grade 3 There was no abnormal ileocecal valve lip-shaped at the end of the ileum, and the opening of the appendix was clear. There was no erosion, ulcer and neoplasm. There was a mucosal bulge in the ascending colon, about 1.5x0.6cm in size, smooth surface, yellow and 30cm from the anus. No biopsy was taken, and electrotomy was performed to find The co…	Descending colon	Tubular adenoma									10	3	yes
160	male	81		115497788	2017-01-17 13:05:00				have				have	no	no						Currently taking	Abdominal pain or distension			Colonoscopy (general)	Multiple telangiectasia in the colon	Endoscopy room 7		Examination	no	Entry time: 19 Bowel cleanliness grade 3 The ileocecal valve was lip-shaped, the opening of the appendix was clear, and no erosion or ulcer or neoplasm was observed. Two capillaries were broken in the beginning of the ascending colon. The colonic mucosa was smooth, the vascular texture was clear, and the plica of semilunaris was intact											19	3	yes
161	female	81 in November	1035462		2023-09-20 10:36:00	Never smoked	Are drinking alcohol	no	have	5.61	1.67	3.84	have	no	have	7.4	160	63		III		Change in bowel habits			Colonoscopy (painless)	Colon polyps Clamp net Colonic telangiectasia Colonic diverticula	Endoscopy room 1	Colon polyps, diverticula, telangiectasia	Examination	(Rectum) consistent with hyperplastic polyps	Insertion time: 5 BBPS: LC:3+TC:3+RC:3= 9 The ileocecal valve was lip-shaped, the opening of the appendix was clear, no erosion and ulceration or neoplasm was found. There was a submucosal vascular dilatation of 0.4cm in the ascending colon, surrounded by white halo, multiple diverticula in the sigmoid colon, with fecal residue, and a polyp in the rectum. The remaining colonic mucosa was smooth, …	Rectum	Hyperplastic polyps									5	9	yes
162	male	81 in November		113839736	2023-10-08 09:23:00	Never smoked	Never drank alcohol	no	have	5.45	1.6	4.09	have	no	no	6.1	168	52			Currently taking	Change in bowel habits			Colonoscopy (general)	Rectum Cancer? Rectal bulge, pending pathology neuroendocrine carcinoma NEC Colonic polyp, pending management	Endoscopy Room 2	Rectal cancer, rectal neuroendocrine carcinoma, Colonic polyps	Examination	13cm from rectum to anus: high grade tubular adenoma. Rectum 8-12cm from anus: neuroendocrine carcinoma NEC	Entry time: 4BBPS: LC:2+TC:3+RC:3= 8 The ileocecal valve was lip-shaped and the opening of the appendix was clear. There was no erosion, ulcer or neoplasm. An Isp polyp with a size of 0.8*1.0cm, smooth surface and similar color was found in the rectum 16cm from the anus. On the other side, there was a raised mass 8-12cm from the anus, with a semicircular lumen, slightly concave and uneven surface…	Rectum	High-grade intraepithelial neoplasia	Rectum	Neuroendocrine carcinoma							4	8	yes
163	female	81 years and 13 days	1065906		2022-10-26 10:52:00	Never smoked	Never drank alcohol	A first-degree relative over 60 years old was diagnosed with colorectal cancer.	have	4.17	0.7	1.74	no	no	no		168	50		III	Never used before.	Follow-up for history of colon cancer/polyps			Colonoscopy (painless)	Colonic polyps, treated by endoscopic cold cutting Multiple diverticula in the colon	Endoscopy room 3	Colonic polyps, diverticula	Treatment (EMR)	Tubular adenoma	Insertion time: 10 BBPS: LC:3+TC:3+RC:3= 9 No abnormal ileocecal flap was found in the mucosa of the terminal ileum. The appendix opening was clear, no erosion, ulcer or neoplasm was found. The diameter of the opening was 0.6-0.8cm, the inner wall was smooth, and the transverse colon was about 60cm near the splenic flexure and the anus. The specimen was removed with biopsy forceps and the wound w…	cross	Tubular adenoma									#VALUE!	9	yes
164	male	81 in January	1128991		2023-02-27 15:29:00	Has quit smoking	Are drinking alcohol	no	no	3.62	0.83	2	have	no	no		160	59		II	Never used before.	Change in bowel habits			Colonoscopy (painless)	Rectal mass with bleeding, stenotic carcinoma Endoscopic hemostasis was performed Multiple rectal polyps One forceps removed and one to be removed (into the rectum)	Endoscopy room 3	Rectal cancer, polyp	Examination	(rectum) consistent with sessile serrated lesion Metaplastic adenocarcinomas were found in the broken fibrous tissue	The biopsy *3 was hard and brittle, easy to bleed, and was washed repeatedly with ice saline. There was another Isp type polyp, about 0.8cm, smooth surface, and no active bleeding. There was another ISP-type polyp, about 0.4cm in size, with smooth surface and peripheral color, and soft texture, which was removed by biopsy forceps	Rectum 0.8	Sessile serrated lesions were seen	Rectum	Adenocarcinoma							Failure	Data missing	Intestinal obstruction
165	female	81 in January	1049545		2023-04-13 08:44:00	Never smoked	Never drank alcohol	no	have	4.6	3.95	2.46	no	have	no	6.6	164	68		III	Currently taking	hematochezia			Colonoscopy (painless)	Multiple polyps in the colon Cold removal of 1 One was left to be processed Internal hemorrhoids Anal fissure	Endoscopy room 1	Colonic polyps	Examination	Ascending and hepatic flexure: sessile serrated lesion	Entry time: 6BBPS: LC:2+TC:3+RC:3= 8 The ileocecal valve was lip-shaped, and the opening of the appendix was clear. An IS-type polyp, 0.5*1.0cm in size, covered with mucus, was found in the ascending colon, and an IS-type polyp, 0.6*0.7cm in size, with smooth surface and similar color was found in the hepatic flexure. Rectal inversion showed internal hemorrhoids. The rest of the colon mucosa was …	l	Sessile serrated lesions were seen	Hepatic flexure	Sessile serrated lesions were seen							6	8	yes
166	male	81 in January		1003894715	2024-05-21 09:05:00				have					no	have										Colonoscopy (general)	Colonic polyps Clamp net Colonic diverticulum	Endoscopy Room 2	Colon polyps, colon diverticula	Examination	(hepatic flexure) tubular adenoma, GⅡ (Descending colon) tubular adenoma, GⅡ	Entry time: 4BBPS: LC:2+TC:3+RC:2=7 The ileocecal flap was lip-shaped, the opening of the appendix was clear, and no erosion, ulcer or neoplasm was observed. Three polyps, 0.3-0.5cm in diameter, were found in the hepatic flexure and descending colon, and the bottom was smooth	Hepatic flexure	Tubular adenoma	Descending colon	Tubular adenoma							4		yes
167	female	81 in January		124294165	2023-07-28 08:45:00					3.25	1.74	1.75	have	no	no		152	70		III	Never used before.	Change in bowel habits			Colonoscopy (general)	Colon polyps Cold resection Poor bowel preparation	Endoscopy room 6	Colonic polyps	Treatment	Tubular adenoma (sigmoid colon), G II	Entry time: 12BBPS: LC:1+TC:2+RC:1=4 The ileocecal flap was lip-shaped, the opening of the appendix was clear, and an IS-type polyp (0.6cm) was seen in the sigmoid colon. The surface was smooth and the color was similar to the surrounding. The snare was removed cold	Sigmoid colon	Tubular adenoma									12	4	yes
168	male	Aged 81 in February	1160607		2024-05-17 13:07:00	Never smoked	Never drank alcohol	no		3.04	0.79	2.27	no	have	no		174	75			Used intermittently	Abdominal pain or distension	No complications	Survival	Colonoscopy (general)	Colon cancer Stricture of the colon Colonic stent placement via electronic endoscopy under DSA	ERCP	Colon cancer	Treatment (Stent placement)	(Splenic flexure of the colon) adenocarcinoma was considered	After cleansing and lubrifying the intestine, the electronic colonoscopy was inserted from the anus, followed by the entry of the endoscope to the stenosis site. A circumferential raised mass was found at the splenic flexure of the colon about 60cm from the anus. The mucosal structure on the surface disappeared, the surface was erosive, the surface was brittle, and easy to bleed. The length of th…	Malignant tumor of splenic flexure	Adenocarcinoma									Failure	Data missing	Intestinal obstruction
169	male	Aged 81 in February	1132105		2023-04-23 14:40:00	Has quit smoking	Never drank alcohol	no		4.53	1.43	1.16	have	have	no		155	53		III	Currently taking	loss of weight			Colonoscopy (painless)	Multiple polyps in the colon Rectal bulge -SMT? Internal hemorrhoids?	Endoscopy room 3	Colonic polyps	Examination	no	Lens entry time :2 BBPS: LC:1+TC:2+RC:3= 6 The ileocecal valve was lip-shaped, the appendix opening was clear, and no erosion or ulceration or neoplasm was found. At 30cm of sigmoid colon and 15cm of rectosigmoid junction, there was a polyp, type Is, 0.8cm in diameter, smooth surface and similar color to surrounding. It was 1.5cm in diameter, with a smooth surface and similar color to the surroun…	0.8 for sigmoid colon		Rectus B junction 0.8								2	6	yes
170	male	Aged 81 in February	1124485		2022-09-19 10:04:00	Never smoked	Never drank alcohol	no	have	4.01	1.31	2.45	no	no	no		168	67		II	Currently taking	Follow-up for history of colon cancer/polyps	No complications	Survival	Colonoscopy (painless)	Multiple polyps in the colon Poor bowel preparation	Endoscopy Room 4	Polyps	Examination	Cecum: tubular adenoma, cecum: tubular adenoma, chronic inflammation of ascending and mucous membrane; Ascending: mixed polyp with tubular adenoma hyperplasia. Hepatic flexure: tubular adenoma	Entry time: 4BBPS: LC:2+TC:1+RC:1=4 The ileocecal flap was lip-shaped and the opening of the appendix was clear. There was no erosion, ulcer or neoplasm. There was an Isp polyp with a surface lobe, about 0.8*1.0cm in size, and another Is polyp with a smooth surface, about 0.4 × 0.5cm in size, in the cecum. A ISP-type polyp, about 0.6x1.0cm in size, was found in the ascending colon about 70cm from…	4.	Tubular adenoma									4	4	yes
171	male	81 in March	1121517		2022-09-09 15:30:00	Never smoked	Never drank alcohol	no	no				no	no	no		158	67		II	Never used before.	Change in bowel habits			Colonoscopy (painless)	Sigmoid colon cancer Multiple polyps of the colon 1 colon polyp was resected by electronic endoscopic snare (EMR) and 1 colon polyp was resected by cold surgery	Endoscopy room 1	Colon cancer, polyps	Treatment (EMR)	1. (Sigmoid) tubular adenoma, low grade (Rectum) villous tubular adenoma, low grade 3. Metaplastic tubular adenocarcinoma (sigmoid colon) Immunohistochemical results: Her-2 (0), MSH6 (+), MSH2 (+), MLH1 (+), PMS2 (+), P53 (mutant), Ki-67 (about 90%+), CK20 (+), SATB2 (+)	Insertion time: 6BBPS: LC:2+TC:2+RC:2= 6 The hook method was used to enter the endoscope through the cavity to the ileocecal valve, and the endoscope was smoothly entered. The intestinal preparation was poor, and there was a large amount of feces in the intestinal cavity, which affected the observation of an Isp polyp 30cm from the sigmoid colon to the anus. The size was about 0.5x0.4cm, the surf…	Sigmoid colon	Tubular adenoma	Rectum	Villous tubular adenoma	Sigmoid colon	Moderately differentiated tubular adenocarcinoma					6	6	yes
172	male	81 in March		106144260	2022-09-09 10:49:00					3.96	0.72	2.5	have	have			165	70			Currently taking	Abdominal pain or distension	No complications	Survival	Colonoscopy (general)	Multiple diverticula in ascending colon Multiple polyps in the colon	Endoscopy room 6	Diverticula, polyps	Examination	The polyp was not removed at our hospital	Insertion time: 14BBPS: LC:2+TC:3+RC:2= There was no obvious abnormality in the terminal ileum. The ileocecal valve was lip-shaped, the opening of the appendix was clear, there was no erosion and ulcer or neoplasm, and multiple diverticula were found in the ascending colon. The size of the opening was about 0.3-0.8cm. One Is polyp (0.6cm in size) was found in the middle part of the ascending colo…	Three polyps were found										14	7	yes
173	female	At 81 years old in April	1150667		2023-12-27 13:24:00	Never smoked	Never drank alcohol	no					no	no	no		158	58		III	Never used before.	Abdominal pain or distension	No complications	Survival	Colonoscopy (painless)	Colon cancer with strictures Possible malignancy Colonic polyps, multiple Endoscopic aspiration snare resection	Operating room	Colon cancer, polyps	Treatment (EMR)	(hepatic flexure) considered adenocarcinoma; Tubulovillous adenoma (rectum)	Insertion time :3 BBPS: LC:3+TC:3+RC:3= 9 Due to intestinal stenosis, the tumor could not be entered into the stricture, occupying the ring, the mucosal nodules were uneven, and the contact was easy to bleeding. Four pieces of biopsy were crisper and easy to bleeding. Scattered polyps in the transverse colon, descending colon and sigmoid colon were type I-II, and the size was about 0.3-0.6cm, wit…	A space-occupying lesion in the hepatic flexure	Adenocarcinoma	Rectum	Tubulovillous adenoma							3	9	Intestinal obstruction
174	female	At 81 years old in April	1129945		2023-03-09 11:36:00	Never smoked	Never drank alcohol	no	have	2.73	0.65	1.58	have	no	no		155	50		II	Never used before.	Abdominal pain or distension	No complications	Survival	Colonoscopy (painless)	Multiple polyps in the colon, Cold excision and forceps Melanosis of colon Poor bowel cleanliness	Endoscopy room 1	Colonic polyps, melanosis	Examination	Cecum: tubular adenoma, cecum: hyperplastic polyp, ascending: large amount of sepia pigmentation in the intestinal mucosa stroma	Entry time: 5BBPS: LC:2+TC:2+RC:3= 6, influence observation The ileocecal valve was lip-shaped, the opening of the appendix was clear, and there was a large amount of fecal water and fecal residue in the intestinal cavity. The observation was not satisfactory. The colonic mucosa was smooth, the vascular texture was clear, the plica of semilunaris was intact, and there was no erosion, ulcer or neo…	Cecum 0.3	Tubular adenoma	Cecum 0.6	Hyperplastic polyps	Ascending colon 0.4	Chronic mucositis					5	6	yes
175	female	At 81 years old in April		101184381	2022-11-29 10:57:00					4.47	1.38	2.92	have	no	no		159	65		II		Change in bowel habits			Colonoscopy (painless)	Black disease of the colon	Endoscopy Room 2	Melanosis	Examination	no	Entry time: 9BBPS: LC:3+TC:2+RC:2= 8 More semisolid stool in ascending colon, which affected visualization The ileocecal flap was lip-shaped, the opening of the appendix was clear, and no erosion or ulcer or neoplasm was observed. The colonic mucosa was smooth, the tessela-like vascular texture changed, and the plica of semilunaris was intact, and no erosion, ulcer or neoplasm was observed											9	8	yes
176	male	81 years old in May	1137994		2023-07-07 12:35:00	Has quit smoking	Are drinking alcohol	no		4.44	0.56	2.78	have	no	no		157	64			Never used before.	hematochezia	No complications	Survival	Colonoscopy (general)	Multiple polyps in the colon Two colonic polyps were resected by electronic endoscopic suction snare, 2 by cold resection, and 1 by forceps Rectum, Borrmann type III carcinoma possible	Endoscopy room 6	Colonic polyps, rectal cancer	Treatment (EMR)	(Ascending colon) tubular adenoma, GI (hepatic flexure) tubular adenoma, GI (Sigmoid colon) tubular adenoma, G II (Sigmoid) tubular adenoma, GII (Rectum) metaplastic tubular adenocarcinoma	Clean the intestine, lubricating the intestine, electronic colonoscopy with a transparent cap on the front end, inserted from the anus into the scope time: 10 BBPS: LC:3+TC:3+RC:2= 8 No obvious abnormalities were found in the terminal ileum. The ileocecal valve was lip-shaped, the opening of the appendix was clear, and no erosion and ulceration or new growth were observed. One 0.4cm IS-type polyp…	There were 2 cases of ascending colon, hepatic flexure and sigmoid colon	Tubular adenoma	Rectum	Adenocarcinoma							10	8	yes
177	male	Aged 81 in June	1112134		2022-03-18 11:51:00	Has quit smoking	Has stopped drinking	no	no	2.13	0.8	0.8	no	have	no		170	61		III	Never used before.	Change in bowel habits			Colonoscopy (general)	Multiple colorectal polyps Three were forceps removed and one at the rectosigmoid junction was to be removed Rectal mass Poor bowel preparation cancer	Endoscopy Room 2	Rectal cancer	Examination	A hyperplastic (rectal) polyp Moderately hyperplastic adenocarcinoma (rectum)	Insertion time: 6BBPS: LC:1+TC:1+RC:1=3 There was a lot of solid feces in the intestinal cavity, which covered the mucosa and affected the observation of the ileocecal valve. The opening of the appendix was clear and the straight B junction was about 15cm from the anus. There was an Isp polyp (about 0.8cm) with smooth surface and similar color. The biopsy forceps were removed, and the soft mass w…	Rectum	Hyperplastic polyps	Rectum	Adenocarcinoma							6	3	yes
178	male	Aged 81 in June	1053443		2022-06-15 10:41:00	Never smoked	Never drank alcohol	no	no	4.49	1.12	2.64	no	no	no		168	62		II		Change in bowel habits			Colonoscopy (painless)	Multiple polyps in colon, forceps clear Endoscopic hemostasis was performed	Endoscopy Room 2	Colonic polyps	Examination	Transverse and rectus B junction: hyperplastic polyps	Lens entry time: 5BBPS: LC:2+TC:2+RC:2= 6 No abnormal ileocecal valve lip-shaped, appendiceal opening was clear, no erosion and ulcer and new growth were observed in the hepatic flexure. Yamada-type polyp was 0.5*0.4cm in size. The surface was smooth, the color was the same as the surrounding, the texture was soft, the biopsy forceps were clean, and the wound was a little oozed blood. A Yamada ty…	cross	Hyperplastic polyps	Straight B junction	Hyperplastic polyps							5	6	yes
179	male	81 in August	1120606		2024-06-12 13:40:00	Never smoked	Never drank alcohol	no	no	3.25	1.34	1.8	no	no	no	5.5	172	63.5		III	Never used before.	Follow-up for history of colon cancer/polyps	No complications	Survival	Colonoscopy (painless)	Colon polyps Cold snare resection (CSP 2 pieces)	Endoscopy Room 4	Colonic polyps	Treatment (EMR)	Hepatic flexure: tubular adenoma GI. Transverse colon: tubular adenoma GI	Insertion time: 3BBPS: LC:2+TC:3+RC:2= 7 One Is polyp (0.5cm in size) was found in the hepatic flexure and transverse colon about 60cm from the anus. NICE type II polyp was observed by BLI staining	Hepatic flexure	Tubular adenoma	Transverse colon	Tubular adenoma							3		yes
180	male	81 in August		115549261	2023-08-14 09:18:00	Has quit smoking	Are drinking alcohol	no	have	2.89	0.65	1.15	have	have	no		165	66.5			Currently taking	Follow-up for history of colon cancer/polyps			Colonoscopy (general)	Multiple polyps in colon, cold removal Multiple diverticula in the colon	Endoscopy room 6	Colonic polyps, diverticula	Treatment (EMR)	Tubular adenoma (transverse colon), GI (transverse colon) tubular adenoma, G II (Descending colon) tubular adenoma, GI (Sigmoid colon) tubular adenoma, GI	Insertion time: 6BBPS: LC:3+TC:3+RC:2= 8 There was no obvious abnormality in the terminal ileum. The ileocecal valve was lip-shaped, the opening of the appendix was clear, and there was no erosion and ulceration or neoplasm. Two IS-type polyps (0.5-0.6cm in size) were found in the transverse colon, one 0.8cm IS-type polyp in the descending colon, and one 0.5cm IS-type polyp in the sigmoid colon. …	cross	Tubular adenoma	cross	Tubular adenoma	Descending colon	Tubular adenoma	Sigmoid colon	Tubular adenoma			6	8	yes
181	male	81 in August		103811533	2024-04-01 09:25:00	Smoking now	Are drinking alcohol		have	5.17	2.15	3.21	no	have	no						Currently taking	Abdominal pain or distension			Colonoscopy (general)	Colonic polyps, forceps removed Poor bowel preparation	Endoscopy room 7	Colonic polyps	Examination	Tubular adenoma (descending colon), GI	Entry time: 7BBPS: LC:2+TC:2+RC:1= 5 The ileocecal valve was lip-shaped, the opening of the appendix was clear, and there was no erosion or ulcer or neoplasm. An Is type polyp (0.4cm) was seen in the descending colon with smooth surface. The biopsy forceps was removed, and the colon mucosa was smooth, the vascular texture was clear, and the plica was intact	drop	Tubular adenoma									7	5	yes
182	male	81 in September	1088518		2023-11-24 10:13:00	Never smoked	Never drank alcohol	no	have	3.04	1.24	1.36	no	no	no		183	84		III	Never used before.	Abdominal pain or distension			Colonoscopy (painless)	Cancer of hepatic flexure of colon Malignant potential Rectal polyps Clamp net	Endoscopy Room 2	Colon cancer, polyps	Examination	Ascending colon: adenocarcinoma, no special type, high grade differentiation; Rectum: tubular adenoma GI	Entry time: 2BBPS: LC:2+TC:3+RC:2=7 There was no abnormality in the mucosa of the terminal ileum. The ileocecal valve was lip-shaped, the opening of the appendix was clear, no erosion, ulcer and neoplasm were observed. A depressed mass of about 3*3cm was observed near the hepatic flexure of the ascending colon, with uneven nodules at the bottom and irregular surface structure. The biopsy was firm…	l	Adenocarcinoma	Rectum	Tubular adenoma							2	7	yes
183	female	81 in September		113822889	2023-09-18 11:19:00			no					have	no	have		155	65		III		Abdominal pain or distension			Colonoscopy (painless)	Multiple polyps in the colon Cold snare resection (CSP 2 pieces)	Endoscopy room 3	Colonic polyps	Treatment (EMR)	(hepatic flexure) villus-tubular adenoma, G II (Sigmoid colon) tubular adenoma, G II	Insertion time: 6BBPS: LC:2+TC:3+RC:2=7 An IS-type polyp, about 0.8cmx1.0cm in size, with lobar surface and peripheral color, without erosion, was found about 60cm from the hepatic flexure of the anus. An IS-type polyp, about 0.8cmx0.6cm in size, with smooth surface and peripheral color, without erosion was found about 25cm from the anus of the sigmoid colon. FICE staining of the above two polyps…	Hepatic flexure 1cm	Villous tubular adenoma	Sigmoid colon	Tubular adenoma							6	7	yes
184	female	81 in September		1003086962	2023-08-23 09:12:00				have	5.97	1.15	4.02	no	no	have	7.3	154	57.5		III		Change in bowel habits			Colonoscopy (painless)	Multiple erosions of colon Infection? Poor bowel preparation	Endoscopy room 5	Colon infection	Examination	(Transverse colon) focal chronic inflammation of the mucosa of the large intestine	Entry time: 5BBPS: LC:2+TC:2+RC:2= 6 Solid feces and fecal water were scattered in the intestinal cavity, covering the mucosa. The ileocecal valve was lip-shaped, the appendix opening was clear, and multiple patchy erosions were scattered in the mucosa from the hepatic flexure to the rectus B junction, about 0.2-0.4cm, covered with white moss, and the surrounding mucosa was hyperemia and red. The…											5	6	yes
185	female	81 in September		113891796	2022-10-13 09:08:00				have				have	no	no		158	65		II	Currently taking	Change in bowel habits			Colonoscopy (painless)	Multiple polyps in the colon Two were removed by forceps and the rest were left to be disposed of Melanosis of the colon	Endoscopy Room 2	Colonic polyps, melanosis	Examination	(transverse colon) tubular adenoma, low-grade melanosis (transverse colon) tubular adenoma, low-grade melanosis	Entry time: 8BBPS: LC:2+TC:2+RC:2= 6 The endoscope was inserted 80cm through the cavity to the ileocecal valve by hook method. The ileocecal valve was lip-shaped without any erosion or ulcer or new growth. There was another Is polyp (0.4x0.4cm in size) on the same fold, with a smooth surface. One Is polyp (0.6x0.5cm, smooth surface, IIIl type glandular opening) was found in the sigmoid colon abou…	2 transverse	Tubular adenoma	3 in the right half								8	6	yes
186	female	81 in September		107782333	2023-09-12 09:38:00	Never smoked	Never drank alcohol	A first-degree relative over 60 years old was diagnosed with colorectal cancer.	have	4.1	0.64	2.66	have	have	have	9.3	155	76		III	Used intermittently	Follow-up for history of colon cancer/polyps			Colonoscopy (painless)	Colonic polyps, forceps clear Postoperative colon	Endoscopy room 1	Colonic polyps	Examination	Hyperplastic polyp (sigmoid colon)	Entry time: 4BBPS: LC:3+TC:3+RC:2= 8 There was no obvious abnormality in the terminal ileum. The ileocecal valve was lip-shaped, the opening of the appendix was clear, no erosion and ulceration and new growth were observed. A 0.4cm IS-type polyp was found in the sigmoid colon, the surface was smooth, the color was the same as the surrounding, and the biopsy texture was soft. The plica of semiluna…	Sigmoid colon	Hyperplastic polyps									4	8	yes
187	male	82	1093899		2020-09-28 13:52:00	Never smoked	Never drank alcohol	no	have	4.43	0.81	2.14	have	no	have		170	59.5		III	Never used before.	hematochezia			Colonoscopy (painless)	Multiple polyps in the colon 2 were clipped and the rest were resected by transurethral resection	Endoscopy room 5		Examination	1 (descending colon) tubular adenoma, low grade; 2 (sigmoid) tubular adenoma, low grade	Entry time: 4 Intestinal cleanliness grade 3 The ileocecal valve was lip-shaped and the opening of the appendix was clear. There was no erosion, ulcer or neoplasm. Two polyps (0.4cm in diameter and 0.3cm in diameter) were found at 45cm of the descending colon and 30cm of the sigmoid colon. The diameter of the polyp was 1.2cm, slightly red, and glandular IIIL type. After resection, the colonic muc…	Descending colon	Tubular adenoma	Sigmoid colon	Tubular adenoma	Sigmoid colon 1.2						4	3	yes
188	female	82	1093320		2021-03-26 14:57:00	Never smoked	Never drank alcohol	no	have	6.47	1.44	4.06	no	no	no	5.7	150	56		II	Never used before.	Abdominal pain or distension			Colonoscopy (painless)	Scar-like changes in the colon	Endoscopy room 3		Examination	no	Entry time: 4 Intestinal cleanliness grade 2 The ileocecal valve was lip-shaped, the appendix opening was clear, and no erosion or ulceration was observed in the terminal ileum. A 2*2cm scar was observed in the transverse colon. The mucosa was slightly folded and the color was similar to the surrounding mucosa											4	2	yes
189	female	82	1091107		2021-02-05 11:30:00	Has quit smoking	Are drinking alcohol	no	have	4.24	3.63	2.33	have	have	no		156	68		III	Currently taking	hematochezia			Colonoscopy (painless)	Colon cancer Multiple polyps in the rectosigmoid colon	Endoscopy room 5	Colon cancer	Examination	Tubular adenocarcinoma (sigmoid colon), metaplastic Immunohistochemical results: SATB2 (+), CDX-2 (+), Villin (+), MLH1 (+), MSH2 (+), MSH6 (+), PMS2 (+), Her-2 (1+), Ki-67 (80%+), P53 (partial +), in situ hybridization results: EBV-EBER (-, positive control +)	Entry time: 1 Intestinal cleanliness grade 1 At 20cm into the sigmoid colon, a circumferential narrow mass was found, with a lobulated surface, erosion in the center, and filth covered. The surrounding mucosa was uneven and convergent, and the lumen was narrow, and the endoscope could not pass through. Biopsy of 6 crispy specimens of the sigmoid colon and rectum showed one lobulated polyp with a …	Sigmoid colon	Adenocarcinoma	Two of them were 1cm in size	Adenoma							1	1	Intestinal obstruction
190	male	82	1081503		2020-07-31 15:02:00	Never smoked	Are drinking alcohol	no	have	4.79	4.63	2.41	have	no	have	6.8	171	81		II		Positive fecal occult blood			Colonoscopy (painless)	Multiple polyps in the colon	Endoscopy Room 4		Examination	Tubular adenoma	Entry time: 4 Intestinal cleanliness grade 3 ascending colon more feces influence observation The orifice of the appendix was clear, and no erosion and ulcer or neoplasm were observed. Three Isp type 0.6*0.8cm and 0.5cmIs polyps near the ileocecal junction of the ascending colon were found, and the surface gland tube type III was found. The size of the tip was 1.5*1cm, the length of the pedicle w…	There were 20 polyps	Tubular adenoma									4	3	yes
191	female	82	1064308		2020-09-29 11:43:00	Never smoked	Never drank alcohol	no	no	3.47	1.37	2.08	no	no	no		150	50		III	Never used before.	Abdominal pain or distension			Colonoscopy (general)	Colon surgery Intestinal fistula Poor bowel cleanliness Abdominal fistulostomy	Endoscopy Room 4		Examination	no	The abdominal wall stoma was found in the left lower abdomen, and the surface mucosa was slightly red and swollen. Through the stoma, a fistula was found 6cm into the scope, with a size of 1.2*1.5cm, the edge was red and swollen, and there was no fresh bleeding. The tissue was white in the fistula, and there was a lot of feces on the surface. No abnormality was found (CO2 gas was used during the …											Failure	5	Poor bowel preparation prevented completion.
192	male	82	1055905		2019-03-05 17:10:00	Has quit smoking	Has stopped drinking	no	have	2.95	0.44	1.13	no	have	no		170	68		III	Used intermittently	hematochezia			Colonoscopy (general)	Multiple colon, cancer possible Multiple polyps in the colon with partial markers Mucosal bulge at the mouth of the appendix, SMT?	Endoscopy Room 2		Examination	1. (Ascending colon) metaplastic tubular adenocarcinoma (size 2*2*0.4cm), invading the periintestinal fat layer, no vascular tumor thrombus, no nerve invasion, no tumor in the mesentery stump; No tumor was found in lymph nodes (0/20), and two lesions of low-grade tubular adenoma (0.2*0.2*0.2cm, 0.4*0.4*0.2cm) were found 2. (Sigmoid colon) metaplastic tubular adenocarcinoma (size 6*6*1.5cm), invol…	Time of endoscopy entry: 7 Intestinal cleanliness grade 3 The ileocecal valve was lip-shaped, and the mucosa at the opening of the appendix was raised, with a smooth surface, tough texture and poor mobility. Next to it, an Isp polyp, 0.6*0.6cm in size, was red with a smooth surface, and a raised mass, 2.5*3.5cm in size, was found in the middle of the ascending colon. Covered with yellow and white…	l	Adenocarcinoma	There were six polyps		Sigmoid colon	Adenocarcinoma					7	3	yes
193	male	82	1051948		2021-09-16 15:25:00	Never smoked	Never drank alcohol	no	no	4.04	1.28	2.77	no	no	have	5.7	165	75		II	Never used before.	Follow-up for history of colon cancer/polyps			Colonoscopy (painless)	Postoperative changes of colon Poor bowel cleanliness	Endoscopy room 1		Examination	no	Lens entry time: 5, intestinal cleanliness grade 4, poor bowel preparation The ileocecal valve was lip-shaped, the opening of the appendix was clear, and no erosion or ulcer or neoplasm was observed. The colonic mucosa was smooth, the vascular texture was clear, and the plica of semilunaris was intact, and no erosion, ulcer or neoplasm was observed											5	4	yes
194	female	82	1050444		2018-11-16 13:52:00	Never smoked	Never drank alcohol	no	no	4.73	1.15	3.18	have	no	no	6.7	165	85		III	Never used before.	Abdominal pain or distension			Colonoscopy (general)	Sigmoid colon mass Cancer possible	Endoscopy room 5	Colon cancer T4n2m0	Examination	(Sigmoid colon) a few tissues with high-grade intraepithelial neoplasia, focal infiltration, cannot exclude more severe lesions, please combine with endoscopic findings and immunohistochemical results: CK (+), CEA (+), MLH1 (+), MSH2 (+), MSH6 (+), PMS2 (+), Ki-67 (about 80%+), P53 (mutant +), CDX-2 (+)	Entry time: 1 Intestinal cleanliness grade 2 A mass was found in the sigmoid colon, with circumferential stenosis, irregular surface shape, disappearance of part structure, distortion and bruising. The central opening size of the blood vessel was about 0.4x0.5cm. Bubbles and liquid intestinal contents could be seen spilt and a little erosion could be seen, without coating, and the boundary was st…	Sigmoid colon	Adenocarcinoma									1	2	Intestinal obstruction
195	male	82	1046431		2018-09-07 11:53:00	Never smoked	Never drank alcohol	no	no				have		have	8.2	165	80			Never used before.	Abdominal pain or distension			Colonoscopy (general)	Melanosis of colon Multiple polyps of the colon Poor bowel preparation prevented further endoscopy	Endoscopy Room 2		Examination	Transverse, transverse, descending: tubular adenoma	Entry time: 50 Intestinal cleanliness 5 Grade Two ISS-type polyps (0.4x0.5cm and 1.0x0.6cm, respectively) were found in the mucosa below the transverse colon. The surface was smooth and no erosion was observed. The rest of the colon mucosa was brown black	cross	Tubular adenoma	cross	Tubular adenoma	Descending colon	Tubular adenoma					50	5	技术难度
196	male	82	1045619		2018-09-03 11:18:00	Smoking now	Are drinking alcohol	no	have	2.37	0.86	1.02	have	have	no	5.6	165	62.5		III	Used intermittently	Abdominal pain or distension			Colonoscopy (general)	No abnormalities were found in the whole colonic mucosa	Endoscopy room 1		Examination	no	Lens entry time: 6 Intestinal cleansing Degree 2 The ileocecal flap was lip-shaped, the opening of the appendix was clear, and no erosion or ulcer or neoplasm was observed. The colonic mucosa was smooth, the vascular texture was clear, and the plica of semilunaris was intact, and no erosion, ulcer or neoplasm was observed											6	2	yes
197	female	82	1042113		2018-11-07 18:13:00	Never smoked	Never drank alcohol	no	have	5.36	4.44	3	have	no	no	5.9	160	60			Never used before.	Change in bowel habits			Colonoscopy (general)	Diffuse inflammation of terminal ileum and colon Infection may be large Multiple polyps in the colon	Endoscopy Room 2		Examination	Terminal ileum: necrotic base granulation tissue, few glands visible, cecum: chronic inflammation, sigmoid: tubular adenoma, and cryptitis, crypt abscess formation.	Enteroscopy time: 8 Intestinal cleanliness grade 3 The mucosa of the terminal ileum was swollen and red, and a lot of yellow-white mucus was attached. The biopsy was weak, and there was a smear of secretion. There was a lot of turbidified white fluid in the intestinal cavity. The appendix opening is clear, a shallow ulcer can be seen in the cecum, the surface is red, and the surrounding sticky Th…											8	3	yes
198	female	82	1041367		2018-06-15 12:01:00	Never smoked	Never drank alcohol	no	no	3.76	1.04	1.85	have	no	have		154	31		III	Never used before.	Abdominal pain or distension			Colonoscopy (general)	Ascending colon cancer Multiple polyps in the colon	Endoscopy room 5	High-grade intraepithelial neoplasia, tending to tubular adenocarcinoma	Examination	(Ascending colon) high-grade intraepithelial neoplasia, inclined to tubular adenocarcinoma, combined with endoscopic findings Immunohistochemical results: MSH6 (+), MSH2 (+), MLH1 (less +), PMS2 (+), P53 (mutant +), Ki-67 (80%+), Her-2 (-)	Entry time: 30 intestinal clearance Degree of cleanliness 4 By hook pulling method, the endoscope was inserted 100cm into the ascending colon, but the entry was not smooth. There was a mass in the ascending colon near the hepatic flexure, circumferential growth, local stenosis of the intestinal cavity, and the endoscope could not pass through. The biopsy texture was crispness. The plica of semilu…	l	Adenocarcinoma									30	4	yes
199	female	82	1036232		2017-05-31 10:03:00	Never smoked	Never drank alcohol	no	have	4.67	2.39	2.8	have	no	have	7.3	158	60		III	Never used before.	Follow-up for history of colon cancer/polyps			Colonoscopy (general)	No abnormalities were found in the colonic mucosa after surgery	Endoscopy room 7		Examination	no	Entry time: 6 Intestinal cleanliness grade 2 No erosion, ulcer or neoplasm was observed at the blind end. Irregular white scars were observed at the distance of 10 and 30cm from the rectum and colon. The colonic mucosa was smooth, the vascular texture was clear, and the plica of semilunaris was intact											6	2	yes
200	female	82	1027444		2019-06-25 15:53:00	Never smoked	Never drank alcohol	no	have	4.28	1.19	2.53	have	have	have	5.6	160	70			Used intermittently	hematochezia			Colonoscopy (general)	Multiple erosive erythema of colon Infection? Ischemia? Multiple diverticula in the colon	Endoscopy room 5		Examination	The intestinal mucosa (descending colon) is infiltrated by chronic inflammatory cells and glands are more regular (Descending colon) the intestinal mucosa was chronically infiltrated with inflammatory cells and glands were more regular (Sigmoid colon) the intestinal mucosa was chronically infiltrated with inflammatory cells and glands were more regular There were scattered chronic inflammatory ce…	Entry time: 20 Intestinal cleanliness grade 4 The appendiceal orifice and ileocecal valve were covered by solid feces. The observation was not satisfactory. The descending colon to sigmoid colon mucosa was slightly edematous, and there were scattered red erosions about 0.3-0.4cm in size, and the mucosa between erosions was almost normal. There was a stripe erythema about 6 cm in length. Multiple …											#VALUE!	4	yes
201	male	82	1021322		2017-08-01 08:14:00	Has quit smoking	Has stopped drinking	no	have	4.21	0.58	3	have	have	no	5.6	168	80			Currently taking	hematochezia			Colonoscopy (general)	There were more formed feces in the intestinal cavity, which affected the observation	Endoscopy room 10		Examination	no	Intestinal cleanliness was grade 5 Hook benitez following cavity mirror 10 cm to the rectum, within the lumen is more molding dung, unable to continue into the mirror observation, mirror											Failure	5	Poor bowel preparation prevented completion.
202	male	82	1007588		2016-05-17 15:13:00	Has quit smoking	Are drinking alcohol	no	have	3.86	0.68	1.48	have	no	no	4.9	175	58		II	Never used before.	loss of weight			Colonoscopy (general)	Colonic polyps Electric resection EMR	Endoscopy room 1		Treatment (EMR, catheterization, hemostasis, foreign body removal)	1. (Ascending colon polyp 0.3CM) consistent with low-grade tubular adenoma (grade I) 2. (Ascending colon polyp 0.6CM) low-grade tubular adenoma with erosion_X000D_	Rectal examination showed negative bowel cleanliness grade 3 The ileocecal valve was lip-shaped. The opening of the appendix was clear and 65cm from the anus. A 0.6×0.7 cm Yada type II polyp was found in the ascending colon, with rough and uneven surface and soft texture. After injection of 2ml0.005% epinephrine saline into the root, the polyp was observed to be raised and the mucosa was white. T…	l	Tubular adenoma	l	Tubular adenoma							Data missing	Data missing	yes
203	female	82	1002960		2018-03-20 10:03:00	Never smoked	Never drank alcohol	no	have	5.17	1.02	3.31	have	have	no	5, 7	162	59		II	Used intermittently	Follow-up for history of colon cancer/polyps	No complications	Survival	Colonoscopy (painless)	After colectomy Colonic polyps Part clamp clean	Endoscopy room 1		Examination	(Ascending colon) tubular adenoma, low grade	Lens entry time: 8 intestinal tracts Cleanliness grade 4: The endoscope was inserted 70cm through the lumen to the end of the ileum, and there was a lot of fecal water in the intestinal cavity. The part of the mucosa was satisfied with the observation of the ileocecal valve was lip-shaped, the opening of the appendix was clear, and no erosion and ulcer or neoplasm was observed. The size was about…	Up to 4	Tubular adenoma	Transverse 1cm	Tubulovillous adenoma with small foci of high grade	Ascending colon	Sessile serrated lesions were seen	Sigmoid colon	Chronic mucositis			8	4	yes
204	female	82		1312030	2021-02-25 13:48:00					3.99	1.43	2.05	no	no	no		156	64		III	Never used before.	hematochezia			Colonoscopy (painless)	Colonic polyps Clamp net Melanosis of colon Hemorrhoids	Endoscopy Room 2		Examination	(Hepatic flexure colon) tubular adenoma, low-grade melanosis	Entry time: 15 Intestinal cleanliness grade 2 The ileocecal valve was lip-shaped, the opening of the appendix was clear, and there was no erosion and ulcer or neoplasm. Brown mucosal changes were observed in the ascending colon. A polyp of Yamada type I, about 0.4cm in size, was found in the hepatic flexure of the colon, with smooth surface mucosa. There was no erosion, ulcer and neoplasm. Hemorr…	Hepatic flexure	Tubular adenoma									#VALUE!	2	yes
205	male	82		103963407	2019-11-05 16:12:00				have	4.55	1.83	2.91	no	have	have							abdominal mass			Colonoscopy (general)	Colonic polyp, forceps net	Endoscopy room 3		Examination	Tubular adenoma (transverse colon), low grade	Entry time: 11 Intestinal cleanliness level 3-4 There was no obvious abnormality in the ileum at the end of the poor entry. The ileocecal valve was lip-shaped, the opening of the appendix was clear, there was no erosion and ulceration and new growth. The rest of the colon mucosa was smooth, the vascular texture was clear, and the plica of semilunar was intact. There was no erosion, ulcer or neopl…	cross	Tubular adenoma									11	4	yes
206	male	82		101590099	2017-01-24 10:14:00				no				no	no	no						Never used before.	Abdominal pain or distension			Colonoscopy (general)	Multiple polyps in colon, forceps clear	Endoscopy room 7		Examination	(25cm from anus) polypoid lesion, no obvious abnormality of mucous membrane, mucosal muscle structure was not clear, submucosal blood vessels and fibrous tissue proliferated, consistent with filamentous polyps	Entry time: 5 Intestinal cleanliness grade 2 The endoscope was inserted 70cm through the lumen to the end of the ileum by hook method. Four polyps of type II and III with size of 0.3-0.4cm were found 25cm from the anus	There were 4 sigmoid colon polyps	Filamentous polyps									5	2	yes
207	female	82		113906450	2019-08-23 13:56:00			A first-degree relative over 60 years old was diagnosed with colorectal cancer.	have				have	no	no						Never used before.	Change in bowel habits			Colonoscopy (general)	Colonic polyps - Clamp net_X000D_ Melanosis of colon	Endoscopy room 5		Examination	Melanosis of the intestinal mucosa (ascending colon)	when entering the lens Room: 15 Intestinal cleanliness grade 3 The scope was inserted 70cm through the lumen to the end of the ileum by the hook method. The ileocecal valve was lip-shaped and the opening of the appendix was clear, without erosion and ulcer and ascending colon neoplasm There was an IS-type polyp, 0.3cm in diameter, with smooth surface and the same color as the surrounding. The rem…	l	Chronic mucositis									15	3	yes
208	female	82		124670339	2022-01-05 11:18:00	Never smoked	Never drank alcohol	no	have	5.74	1.59	3.83	have	no	no		150	45		II	Never used before.	Abdominal pain or distension			Colonoscopy (painless)	Ileocecal valve scar, inflammatory polyp, old tuberculosis? Nature of ascending colon polyp to be determined Rectus B junction polyp, forceps net	Endoscopy room 5		Examination	(Ascending colon) high-grade intraepithelial neoplasia, prone to cancerization, shallow sampling, no muscularis mucosa, can not exclude more serious lesions, please consider the clinical and endoscopic findings (Rectosigmoid junction) Tubular adenoma, low grade	Entry time: 5 BBPS: LC:2+TC:2+RC:1= 5_X000D_ Two digital polyps (2.5cm and 0.8cm in length) were found at the end of the ileum. The smooth surface of the ileocecal valve was deformed, and the white scar was seen around the end of the endoscope. There were multiple digital polyps (0.3-0.6cm in size) at the valve orifice. There was one Isp polyp in the ascending colon, about 1.8×1.0cm in size, with…	l	Adenocarcinoma	Straight B junction	Tubular adenoma							5	5	yes
209	female	82		100844212	2016-12-26 13:32:00	Never smoked	Never drank alcohol	no	have	3.96	1	2.35	have	have	no		150	40		II	Currently taking	hematochezia			Colonoscopy (general)	Ascending colon - Cancer? Colonic polyps Melanosis of the colon	Endoscopy room 7		Examination	(Ascending colon) tubular adenocarcinoma, metaplasia suggested immunohistochemical markers Ki-67,P53,MLH1, MSH2, MSH6, PMS2, HE	Time of entry: 15 intestinal cleanliness grade 2 The terminal ileum was narrow and could not pass through, and the lesion involved the ileocecal valve. At the end of the ileum, it seemed that the normal mucosa from the cecum to the beginning of the ascending colon was seen around 2/3 of the circumferential raised mass. The mass was cauliflowerlike, with red erosion of the surface mucosa, tortuous…	l	Adenocarcinoma									15	2	yes
210	male	82		1803727	2018-01-22 16:15:00								have	no	no						Currently taking	hematochezia			Colonoscopy (general)	Ascending colon polyposis - Clamp net	Endoscopy room 7		Examination	(Ascending colon) tubular adenoma, low grade	Entry time: 16 Intestinal cleanliness grade 3 An IS-type polyp (0.4cm in diameter) was found in the ascending colon. The colon mucosa was smooth, the vascular texture was clear, and the plica was intact. There was no erosion, ulceration or neoplasm	l	Tubular adenoma									16	3	yes
211	male	82		102168653	2020-10-22 14:24:00	Smoking now	Are drinking alcohol	no	have	5.22	0.94	3.26	no	no	no		162	48.5		II	Never used before.	Change in bowel habits			Colonoscopy (painless)	Multiple colonic polyps (2 were removed by forceps, the other 2 were biopsy) Melanosis of colon	Endoscopy Room 4		Examination	(Ascending colon) tubular adenoma, low-grade melanosis (Descending colon) tubular adenoma, low-grade melanosis (Descending colon) tubular adenoma, low-grade melanosis (rectal) tubular adenoma, low-grade melanosis also showed chronic inflammatory cell increase, erosion and interstitial fibrosis in the intestinal mucosa. Follow-up is recommended	Time of endoscopy entry: 7 Intestinal cleanliness grade 2 The ileocecal flap was lip-shaped and the opening of the appendix was clear. There was no erosion, ulcer or neoplasm. A 0.4*0.3cmIs polyp with smooth surface was found near the ileocecal junction of the ascending colon. There was erosion on the surface. One and two other biopsies of the rectum (2cm from the anus) showed a 0.4cmIsp polyp wi…	l	Tubular adenoma	drop	Tubular adenoma	drop	Tubular adenoma	Rectum	Tubular adenoma			7	2	yes
212	female	82		124357457	2018-05-11 09:58:00					4.79	0.98	3.27										hematochezia			Colonoscopy (general)	Colon cancer	Endoscopy room 5		Examination	Tubular adenocarcinoma (sigmoid colon)	Entry time: 1 Intestinal cleanliness 2 Grade A circumferential mass was found at the rectosigmoid junction about 15cm into the endoscope, covering the whole circumference of the intestinal lumen. The surface was nodular and congested, covered with old blood crust. The surrounding mucosa was stiff and deformed, and the lumen was narrow, and the endoscope could not pass through	Sigmoid colon	Adenocarcinoma									1	2	Intestinal obstruction
213	male	82		1914858	2018-05-21 16:06:00								no	no	no						Used intermittently	Follow-up for history of colon cancer/polyps			Colonoscopy (general)	Rectal cancer	Endoscopy room 3	Rectal cancer	Examination	Tubular adenocarcinoma	A mass occupying was seen 8cm from the rectum to the dentate line The rectum was circumferential and the intestinal lumen was narrow. The mucosa at the stenosis was brittle and easy to bleed after biopsy	Rectum	Adenocarcinoma									Failure	Data missing	Intestinal obstruction
214	female	82		100020949	2019-12-25 11:33:00				have				have	no	no		159	65		II	Never used before.	Follow-up for history of colon cancer/polyps			Colonoscopy (painless)	Multiple diverticula in the colon Colonic polyp, forceps clear Anus flattened and raised	Endoscopy room 3		Examination	(Rectum) sessile serrated polyp	Time of endoscopy entry: 9 Intestinal cleanliness was grade 4, there was much fecal water and formed fecal mass in the intestinal cavity, and the observation of the intestinal cavity was unsatisfactory There were no abnormalities in the mucosa of the terminal ileum. The ileocecal valve was lip-shaped, the opening of the appendix was clear, and no erosion, ulcer or neoplasm was observed. Multiple …	Rectum	Sessile serrated lesions were seen									9	4	yes
215	female	82		101160463	2018-07-31 14:31:00	Never smoked	Never drank alcohol	no	have	4.76	1.49	2.84	have	no	no	5	150	45		II	Currently taking	Abdominal pain or distension			Colonoscopy (painless)	Ileocecal LST Multiple polyps of the colon (cold resection)	Endoscopy room 3		Examination	1 (ileocecal) tubular adenoma, low grade 2 (descending colon) tubular adenoma, low-grade	Entry time: 4 Intestinal cleanliness 4 Grade The ileocecal valve was lip-shaped, the opening of the appendix was clear, no erosion and ulcer and new growth were observed. A 0.6cm Isp polyp with smooth surface was found in the ileocecal region. After ligation of the root with snare, the polyp was removed cold, and there was no active bleeding on the wound. There was a 1.5*1.2cm in the fold of the …	Ileocecal region	Tubular adenoma	Descending colon	Tubular adenoma	Ileocecal region	Sessile serrated lesions were seen					4	4	yes
216	male	82		101578311	2017-03-13 10:53:00	Never smoked	Never drank alcohol	no	have	3.43	0.47	1.78	have	no	no		170	68			Used intermittently	Change in bowel habits			Colonoscopy (general)	Multiple polyps in colon, forceps at the part Melanosis of colon Hemorrhoids	Endoscopy room 8		Examination	1. (Hepatic flexure) tubular adenoma, low grade 2. (hepatic flexure) tubular adenoma, low-grade immunohistochemical markers MSH6, MSH2, MLH1, PMS2, P53, Ki-67 were recommended 3. (Splenic flexure) chronic polypoid colonic mucositis	Enteroscopy time: 5 hours intestinal cleanliness grade 3 No obvious abnormality was found in the terminal ileum. The ileocecal valve was lip-shaped, the opening of the appendix was clear, no erosion and ulcer was found, and no new growth was observed in the hepatic flexure. There was one Yamada type I polyp in the splenic flexure, about 0.4cm in size, with smooth surface and peripheral color, sof…	Hepatic flexure	Tubular adenoma	Hepatic flexure	Tubular adenoma	Splenic flexure	Tubular adenoma	1cm straight B junction	Tubular adenoma	Straight B junction	Tubular adenoma	5	3	yes
217	female	82		1109014	2017-03-08 09:36:00	Has quit smoking	Never drank alcohol	no					have	no	no		160	52			Never used before.	Follow-up for history of colon cancer/polyps			Colonoscopy (general)	Colon polyps Clamp clean	Endoscopy room 8	Polyps	Examination	1. (Ascending colon 1) tubular adenoma, low-grade immunohistochemical detection of MSH6, MSH2, MLH1, PMS2, P53, Ki-67 is recommended 2. (Ascending colon 2) consistent with tubular adenoma, low-grade	Entry time: 5 bowel cleanliness grade 2 The endoscope was inserted 70cm through the lumen to the end of the ileum by hook method. The ileocecal valve was lip-shaped, the opening of the appendix was clear, and no erosion and ulceration or new growth were observed. The remaining biopsy forceps showed smooth colonic mucosa, clear vascular texture, intact semilunar fold, and no erosion, ulcer, or neo…	Ascending colon	Tubular adenoma	Ascending colon	Tubular adenoma							5	2	yes
218	male	82		103027361	2016-08-11 09:59:00	Never smoked	Never drank alcohol	no	have	6.01	1.69	4.95	no	no	no		174	70		II	Never used before.	Follow-up for history of colon cancer/polyps			Colonoscopy (painless)	Ascending colon polyps, electroresection EMR Melanosis of colon	Painless examination room			1. (Ascending colon polyp) Tubular adenoma, low grade 2. (Mottling of sigmoid colon) consistent with melanosis of mucosa	Rectal digital examination was negative for grade 3 intestinal cleansing, and the observation was satisfactory The ileocecal valve was lip-shaped. The opening of the appendix was clear. A 1.0×1.0cm Yada type II polyp was found in the middle segment of the ascending colon. The polyps were observed to be elevated, the mucosa was white, the root of the polyp was ligated by snare, and the wound was c…	Ascending colon 1 cm	Tubular adenoma									Data missing	3	yes
219	female	82		115513747	2021-05-21 15:29:00				have	5.89	2.09	3.79	have	no	no		150	53		II		Follow-up for history of colon cancer/polyps			Colonoscopy (painless)	Sigmoid colon scar - Consider changes after polyp treatment	Endoscopy Room 4		Examination	no	Entry time: 6 Bowel cleanliness grade 3 The ileocecal valve was lip-shaped, the opening of the appendix was clear, and there was no erosion or ulceration or neoplasm. A white scar was seen in the sigmoid colon, and the colon mucosa was smooth, the vascular texture was clear, and the plica of semilunaris was intact											6	3	yes
220	male	82		124817779	2020-05-12 12:39:00	Smoking now	Are drinking alcohol	no		3.22	0.5	1.89	no	no	no		167	46		III		anemia			Colonoscopy (painless)	No abnormalities were found in the whole colonic mucosa	Endoscopy room 5		Examination	no	Entry time: 5 Intestinal cleanliness level 3 No abnormalities were observed in the mucosa of the terminal ileum. The ileocecal valve was lip-shaped, the opening of the appendix was clear, and no erosion or ulcer or neoplasm was observed. The colonic mucosa was smooth, the vascular texture was clear, and the plica of semilunaris was intact											5	3	yes
221	male	82		2085527	2019-07-05 13:43:00	Never smoked	Never drank alcohol	no	no	3.39	0.53	2.01	have	no	no		170	55		III	Never used before.	hematochezia			Colonoscopy (general)	Colon after surgery No obvious abnormalities were found in the anastomosis Colonic polyps	Endoscopy room 1		Examination	Anastomosis: Chronic inflammation of the mucosa	Entry time: 3 Intestinal cleanliness grade 4 A ISP-type polyp (0.6cmx0.5cm in size) was found 65cm from the anus in the ascending colon, with a leaf surface and the same color as the surrounding, and no erosion was observed. The anastomotic site was found 25cm from the anus, and the mucosa was smooth without erosion, ulcer or neoplasm. The mucosa of the anastomosis was smooth, no erosion, ulcer a…	l	0.6 cm									3	4	yes
222	female	82		116110310	2019-06-11 09:22:00	Never smoked	Never drank alcohol	no	no	4.78	1.87	2.95	have	no	no		160	57		II	Used intermittently	Change in bowel habits			Colonoscopy (painless)	No abnormalities were found in the whole colonic mucosa Anal papilla hyperplasia	Endoscopy Room 2		Examination	no	Entry time: 10 intestinal cleanliness grade 2 The ileocecal valve was lip-shaped, the opening of the appendix was clear, and no erosion or ulcer or neoplasm was observed. The colonic mucosa was smooth, the vascular texture was clear, and the plica of semilunaris was intact											10	2	yes
223	male	82		101413224	2018-05-04 11:07:00								have	have	no							Change in bowel habits			Colonoscopy (general)	Melanosis of the colon	Endoscopy room 1		Examination	no	Entry time: 12 bowel Track cleanliness grade 4 The ileocecal valve was lip-shaped, the opening of the appendix was clear, and no erosion or ulcer or neoplasm was observed. The colonic mucosa was smooth and brown, the vascular texture was not visible, and the semilunar fold was intact, and no erosion, ulcer or neoplasm was observed											12	4	yes
224	female	82		1293328	2018-03-13 14:11:00	Never smoked	Never drank alcohol	no	have	5.66	0.49	2.67	no	have	no		158	55			Never used before.				Colonoscopy (general)	Cecal telangiectasia	Endoscopy room 5		Examination	no	Entry time: 8 Intestinal cleanliness grade 2 The ileocecal valve was lip-shaped, the opening of the appendix was clear, and no erosion or ulcer or neoplasm was observed. A telangiectasia was observed in the cecum. The colonic mucosa was smooth, the vascular texture was clear, and the plica of semilunaris was intact, without erosion, ulcer or neoplasm											8	2	yes
225	male	82		101423227	2017-03-27 13:02:00	Has quit smoking	Are drinking alcohol	no	have	3.15	0.93	1.48	have	have	have		164	72			Currently taking	Change in bowel habits			Colonoscopy (general)	No abnormalities were found in the whole colonic mucosa	Endoscopy room 8			no	Entry time: 25 hours intestinal cleanliness level 2 The scope was inserted 90cm into the cecum by hook method. The ileocecal valve was lip-shaped, the opening of the appendix was clear, and no erosion or ulcer or neoplasm was observed											25	2	yes
226	male	82 Oct	1121150		2022-08-23 10:05:00	Smoking now	Are drinking alcohol	no	no	2.37	0.28	0.92	no	no	no		167	58		II	Never used before.	Change in bowel habits	No complications	Survival	Colonoscopy (painless)	Multiple diverticula in the colon Multiple telangiectasia of the colon Colonic polyp, to be transurethral resection Hemorrhoids	Endoscopy Room 2	Diverticula, polyps, telangiectasia	Examination	Transverse: tubular adenoma, rectal: tubular adenoma	Insertion time: 3BBPS: LC:3+TC:2+RC:2=7 There was no obvious abnormality in the terminal ileum. The ileocecal valve was lip-shaped, the opening of the appendix was clear, there was no erosion and ulcer or new growth scattered diverticula in the starting segment of the ascending colon, and the size of the opening was about 0.4-0.8cm, and feces could be seen. There was telangiectasis in the ascendi…	cross	Tubular adenoma	Rectum	Tubular adenoma							3	7	yes
227	male	82 Oct	1054550		2024-05-27 14:39:00	Has quit smoking	Never drank alcohol	no	no	2.84	0.7	1.32	have	have	have		169	70		III	Currently taking	Abdominal pain or distension			Colonoscopy (general)	Multiple diverticula in colon Multiple polyps of the colon Cold resection + forceps net	Endoscopy room 3	Colonic polyps Colonic diverticula	Treatment (EMR)	(lower lip of ileocecal flap) focal chronic inflammation of the mucosa of the large intestine; (Ascending colon) focal chronic inflammation of the large bowel mucosa with hyperplasia of interstitial fibrous tissue; (Ascending colon) focal chronic inflammation with interstitial lymphoid tissue hyperplasia; (hepatic flexure) tubular adenoma, G II; (hepatic flexural) focal chronic inflammation of th…	Entry time: 12BBPS: LC:2+TC:2+RC:2=6 The unsatisfied ileocecal flap was lip-shaped and the opening of the appendix was clear, no erosion and ulceration or new growth was found in the lower lip of the ileocecal flap. A total of more than 10 polyps (0.3-0.8cm, NICEII type) were found from the ascending colon to the splenic flexure. The biopsy forceps were net or cold. 0.6-1.0cm,Isp to Ip, NICE II, …	4.	Tubular adenoma									12		yes
228	female	82 Oct	1007400		2023-06-19 12:00:00	Never smoked	Never drank alcohol	no	have	3.11	1.08	1.7	have	no	no		156	52		III	Used intermittently	Positive fecal occult blood			Colonoscopy (painless)	Colonic polyps Cold resection (1 piece of CSP)	Endoscopy room 5	Colonic polyps	Treatment (EMR)	(Sigmoid) tubular adenoma, GI-II	Entry time: 5BBPS: LC:2+TC:3+RC:2= 7 The endoscope was inserted through the cavity to the end of the ileum, and the endoscope was successfully inserted into the sigmoid colon about 25cm from the anus. An Is polyp, about 0.6cmx0.8cm in size, with smooth surface and similar color to the surrounding, and no erosion was observed	Sigmoid colon	Tubular adenoma									5	7	yes
229	male	82 Oct		105187897	2024-06-19 10:58:00	Never smoked	Never drank alcohol	no	have	4.78	1.91	2.96	have	have	None		174	66		II	Never used before.	Follow-up for history of colon cancer/polyps	No complications	Survival	Colonoscopy (painless)	Multiple colorectal polyps Cold resection and forceps removal	Endoscopy room 3	Colonic polyps	Treatment	Sigmoid colon: tubular adenoma GII, hyperplastic polyp; (cecum, rectum, transverse colon) hyperplastic polyps	Entry time: 4BBPS: LC:2+TC:2+RC:2=6 Solid feces were scattered in the intestinal cavity, which covered the mucosa and slightly affected the ileocecal valve. The opening of the appendix was clear. There were two Is polyps in the cecum, one in the transverse colon and one in the rectum. pit pattern IIIL, cold resection of the snare was performed, and there was no residual wound and a little ooze of…	Sigmoid colon	Tubular adenoma	Blind, straight and transverse	Hyperplastic polyps							4	6	yes
230	male	82 Oct		103095350	2022-12-01 09:50:00								have	no	have		172	60		II	Currently taking	Follow-up for history of colon cancer/polyps			Colonoscopy (painless)	CT showed tumor recurrence in abdominal cavity	Endoscopy room 1	Colonic polyps	Examination	Rectum: Tubular adenoma, low grade. Terminal ileum: superficial mucosal tissue with ulceration and granulation tissue formation, acute and chronic inflammatory cell infiltration in the lamina propria, and flattening of villi.	Entry time: 4BBPS: LC:2+TC:2+RC:3= 7 The mucosa of the blind loop was smooth, the mucosa of the anastomosis was slightly red, and multiple ulcers were seen at the end of the ileum, with a size of 0.3-0.5-0.8*1.2cm. The ulcers were covered with clean thick white moss, the edge was neat, the surrounding mucosa was flat and slightly red, and the biopsy was soft and elastic. The size of the ulcer was…	Rectum	Tubular adenoma									4	7	yes
231	male	82 Oct		124985901	2022-08-10 09:27:00	Never smoked	Never drank alcohol	no					have		have		158	58		II		hematochezia	No complications	Survival	Colonoscopy (general)	There was no abnormality in the colonic mucosa Poor bowel preparation Colonoscopy was reviewed after elective bowel filling preparation	Endoscopy room 6	Poor bowel preparation	Examination	no	The patient was unable to enter the transverse colon due to a large amount of solid stool. The colonic mucosa was smooth, the vascular texture was clear, and the plica of semilunar was intact, without erosion, ulceration, or neoplasm											Failure	Data missing	Poor bowel preparation prevented completion.
232	male	82 years, 11 days		100841557	2023-01-12 14:19:00	Never smoked	Never drank alcohol	no	no	3.66	0.79	2.89	no	no	no		173	60		II	Never used before.	Abdominal pain or distension			Colonoscopy (painless)	Colon cancer nature to be determined	Endoscopy Room 4	Colon cancer	Examination	Mesoplastic tubular adenocarcinoma (caecum)	Entry time: 6BBPS: LC:2+TC:3+RC:2=7 A mass was found on the proximal mesocecal side of the cecum, occupying about 1/2 of the intestinal lumen. The surface was irregular, lobar, with erosion in the center, and covered with dirty coating. The mass had a clear boundary	Cecum	Adenocarcinoma									6	7	yes
233	male	82 Nov		103827769	2022-11-28 09:09:00	Never smoked	Never drank alcohol	no	no	4.47	1.38	2.92	no	no	no		176	75		II	Never used before.	Follow-up for history of colon cancer/polyps			Colonoscopy (painless)	Colon polyps (LST-NG) Poor bowel preparation	Endoscopy room 1	Colonic polyps	Examination	The polyp was not removed at our hospital	Lens entry time: 10 BBPS: LC:0+TC:1+RC:1= 2 There was a large amount of liquid and residue in the intestinal cavity. The ileocecal valve was lip-shaped and the opening of the appendix was clear. There was no erosion and ulceration or neoplasm. The plica of semilunaris was intact, without erosion, ulcer and neoplasm	L 1.2cm										#VALUE!	2	yes
234	female	82 Nov		113891089	2022-08-05 08:54:00				no	3.96	1.64	2.45	no	no	no		160	68		II	Never used before.	Change in bowel habits			Colonoscopy (painless)	Multiple polyps in colon, forceps clear Melanosis of colon Poor bowel preparation	Endoscopy Room 4	Colonic polyps, melanosis	Examination	Liter: tubular adenoma; Transverse: tubular adenoma	Entry time: 7BBPS: LC:2+TC:2+RC:2=6 The ileocecal valve was lip-shaped, and the opening of the appendix was clear. There was no erosion, ulcer or neoplasm. One IS-type polyp (0.4*0.4cm) was found in the ascending colon, and two IS-type polyps (0.2, 0.4*0.5cm) were found in the transverse colon, with smooth surface and similar color. The forceps were net, and the colonic mucosa was smooth with lig…	l	Tubular adenoma	Transverse colon	Tubular adenoma	cross	Tubular adenoma					7	6	yes
235	male	82 years, 13 days		101407821	2023-09-05 11:09:00				no				no	have	have		170	75		III	Currently taking	Change in bowel habits			Colonoscopy (general)	Multiple polyps in the colon Cold resection	Endoscopy room 6	Colonic polyps	Treatment	(Ascending colon) tubular adenoma, GI (transverse colon) tubular adenoma, GI	Insertion time: 15BBPS: LC:2+TC:2+RC:2= 6 Solid feces and fecal water were scattered in the intestinal cavity, and the mucosa was blocked, which affected the observation of the ileocecal valve was lip-shaped. The opening of the appendix was clear, and one polyp was seen in the ascending colon and the transverse colon. The polyps were of type Is and Isp, about 0.6 cm and 0.8cm respectively. The wo…	l	Tubular adenoma	cross	Tubular adenoma							15	6	yes
236	male	82 years and 15 days	1134661		2023-05-19 15:28:00	Never smoked	Never drank alcohol	no	have	3.26	0.74	2.06	have	no	no		166	65		III	Currently taking	anemia			Colonoscopy (painless)	Colon mass The cancer may be large Multiple polyps of the colon - cold excision	Endoscopy room 6	Colonic polyps, colon cancer	Examination	Adenocarcinoma (transverse colon) (Descending colon) tubular adenoma, GI (Sigmoid colon) tubular adenoma, GII	Insertion time :3 BBPS: LC:3+TC:2= 7 A circular mass was found in the transverse colon with irregular surface shape, white moss, clear boundary, uneven surrounding mucosa, and narrow lumen, which made the endoscope impossible to pass through. One 0.6cmIs and 0.6cmIsp polyps were found in the descending colon and sigmoid colon with crisp biopsy texture. The wound was clean without residue and ooze…	Transverse colon	Adenocarcinoma	Descending colon 0.6	Tubular adenoma	0.6 for sigmoid colon	Tubular adenoma					3	7	Intestinal obstruction
237	female	82 years and 15 days	1119288		2022-07-11 11:02:00	Never smoked	Never drank alcohol	no	have	4.39	2.51	2.75	have	no	have	6.7	155	61		III	Never used before.	hematochezia	No complications	Survival	Colonoscopy (painless)	Rectal cancer nature to be determined Multiple polyps in the colon	Endoscopy room 1	Rectal cancer, polyp	Examination	Metaplastic tubular adenocarcinoma (at least intramucosal cancer, combined with endoscopic findings)	Endoscopic entry time: 4 BBPS: LC:1+TC:1+RC:2= 4_X000D_ The ileocecal flap was lip-shaped, the opening of the appendix was clear, no erosion and ulcer or neoplasm was found in the cecum, 1 in the upper lip of the ileocecal flap, 4 in the ascending colon, 6 in the transverse colon, and 4 in the descending colon. The diameter was 0.4-1.5cm, and the polyps were round and irregular. The surface was r…	Rectum	Adenocarcinoma	There were 16 polyps in the whole colon	No pathology							4	4	yes
238	male	82 years and 17 days	1161893		2024-05-22 10:52:00	Never smoked	Never drank alcohol	no	no	4.14	0.59	3.05	have	no	no		170	80		III	Never used before.	Change in bowel habits	No complications	Survival	Colonoscopy (painless)	Multiple polyps in the colon One was removed by forceps and the other was to be resected by electrotomy Melanosis of colon Poor bowel preparation	Endoscopy room 6	Melanosis of colonic polyps	Examination	(Ascending colon) focal chronic inflammation of the large bowel mucosa with interstitial lymphoid hyperplasia; (Descending B junction) tubular adenoma, G II	Entry time: 8BBPS: LC:1+TC:2+RC:1= 4 The ileocecal valve was lip-shaped, the appendix opening could not be viewed due to fecal obstruction, and an Is polyp was found in the hepatic flexure, about 0.4cm pink, soft, and about 45cm from the anal junction, about 1.0cm pink, smooth surface. pit pattern IIIL, diffuse dark brown pigmentation of the colonic mucosa was observed after electrotomy	Hepatic flexure Is0.4cm	Chronic mucositis	The descending B junction is 45cm1cm from the anus	Tubular adenoma							8		yes
239	female	82 in January	1137408		2023-06-28 14:56:00	Never smoked	Never drank alcohol	no					have	no	no		168	83		III	Never used before.	hematochezia	No complications	Survival	Colonoscopy (painless)	Colon polyps Cold resection (CSP 2 pieces) Melanosis of the colon	Endoscopy room 5	Colonic polyps, melanosis	Examination	2 polyps (ascending colon), tubular adenoma, G II and hyperplastic polyp	Entry time: 6BBPS: LC:1+TC:2+RC:1= 4 Two IS-type polyps, 0.5cm and 0.6cm in size, were found in the cecum and ascending colon, with smooth surface and the same color as the surrounding, and no erosion was observed. After the snare ligation, the polyps were removed cold. There was no active bleeding and no residue on the wound. The specimens were taken out and a large amount of fecal water and for…	Rise 0.5cm	Tubular adenoma	Liter 0.6cm	Hyperplastic polyps							6	4	yes
240	male	82 in January	1133642		2024-05-17 11:55:00	Never smoked	Never drank alcohol	no	no	1.45	0.27	0.88	no	have	no	5.6	178	62		III	Used intermittently	Positive fecal occult blood	No complications	Survival	Colonoscopy (general)	Postoperative colon Colonic polyposis - Clamp clean	Endoscopy room 6	Colonic polyps	Examination	Tubular adenoma (descending colon), G II	Entry time: 3BBPS: LC:3+TC:2+RC:2=7 A 0.4cm polyp was found in the descending colon. The colonic mucosa was smooth, the vascular texture was clear, and the plica was intact. There was no erosion, ulceration or neoplasm	Descending colon 0.4	Tubular adenoma									3	7	yes
241	male	82 in January	1001786		2023-08-29 09:08:00	Never smoked	Never drank alcohol	no	have	6.26	0.54	4.35	have	None	no		162	65		III	Never used before.	Change in bowel habits	No complications	Survival	Colonoscopy (painless)	Colon polyps Cold snare resection (CSP 2 pieces)	Endoscopy Room 2	Colonic polyps	Treatment (EMR)	(ascending colon, transverse colon) tubular adenoma, GI	Entry time: 4BBPS: LC:2+TC:2+RC:1= 5 The lens was inserted through the cavity to the end of the ileum by hook method. After entering the lens, an IS-type polyp was found about 65cm from the ascending colon to the anus, with a smooth surface and similar color. The above two polyps were treated with snare ligation and cold resection. There was no active bleeding and no residue on the wound	l	Tubular adenoma	cross	Tubular adenoma							4	5	yes
242	female	82 in February	1113165		2022-04-08 11:01:00	Never smoked	Never drank alcohol	no	have	3.17	1.05	1.66	no	have	no		150	55.5		III	Currently taking	anemia			Colonoscopy (general)	Possible large cancer of the colon	Endoscopy room 3	Colon cancer pT3N0Mx	Examination	(80cm from anus) adenocarcinoma	Entry time: 13BBPS: LC:1+TC:1+RC:2= 3 The mass could not be viewed completely. The surface of the mass was irregular, with clear boundary, uneven surrounding mucosa, narrow lumen, and the endoscope could not pass through. The mass was rough and easy to bleeding	Hepatic flexure	Adenocarcinoma									13	3	Intestinal obstruction
243	female	82 in February		1163170	2023-07-01 09:33:00	Never smoked	Never drank alcohol	no		3.94	1.23	2.35	have	no	have		160	64		II	Used intermittently	Abdominal pain or distension			Colonoscopy (painless)	Colonic polyps Cold resection (3 pieces of CSP)	Endoscopy room 5	Colonic polyps	Treatment (EMR)	Sessile serrated lesion (ascending colon) (transverse colon) tubular adenoma, GⅡ	Insertion time: 6BBPS: LC:1+TC:3+RC:3=7 Using the hook draw method, the endoscope was inserted through the cavity to the ileocecal valve, and the endoscope was successfully inserted into the ascending colon 65cm from the anus. An IS-type polyp, about 0.3cmx0.6cm in size, with smooth surface and the same color as the surrounding, and no erosion was observed. NBI+nearfocus observation showed pitpat…	l	Sessile serrated lesions were seen	cross	Tubular adenoma							6	7	yes
244	male	Aged 82 and March	1130169		2023-03-17 14:20:00	Never smoked	Never drank alcohol	no	no	2.95	1.06	1.72	no	no	no	5.8	171	62		II	Never used before.	Abdominal pain or distension	No complications	Survival	Colonoscopy (general)	Colon cancer possible Colon polyps Cold excision Multiple diverticula in the colon Melanosis of colon	Endoscopy room 6	Colon cancer, Colonic polyps, melanosis, Diverticula	Examination	65cm from anus: adenocarcinoma; Descending colon: Large deposits of sepia in the intestinal mucosa	A circumferential mass was found 65cm from the anus with narrow lumen, which could not pass through the anus, and the surrounding intestinal cavity was dilated. Four biopsies were made, which were poor and crispy and easy to bleed. A 0.7cmIs polyp was found in the descending colon, which was removed by cold suction with the snare. The size of the wound ranged from 0.5 cm to 1.0cm. The remaining c…	Descending colon	Adenocarcinoma	Descending colon	Chronic mucositis							Failure	Data missing	Intestinal obstruction
245	female	Aged 82 and March		117228877	2022-03-02 13:29:00				have				have	have	no		150	44		III	Used intermittently	Change in bowel habits			Colonoscopy (painless)	Multiple polyps in colon, forceps clear Melanosis of colon	Endoscopy Room 2		Examination	Tubular adenoma of hepatic flexure, low grade, melanosis	Entry time: 3BBPS: LC:2+TC:3+RC:3= 8 The ileocecal valve was lip-shaped, and the opening of the appendix was clear. There was no erosion, ulcer or neoplasm in the hepatic flexure. Two IS-type polyps, 0.4-0.5cm in size, were found in the colon, with smooth surface, pink color and clean clamp. The plica of semilunaris was intact, without erosion, ulcer or neoplasm	Hepatic flexure	Tubular adenoma	Hepatic flexure	Tubular adenoma							3	8	yes
246	male	At age 82, April	1123874		2022-10-24 10:50:00	Never smoked	Never drank alcohol	no	no	4.89	0.76	2.52	have	no	no		170	74		II	Never used before.	Abdominal pain or distension	No complications	Survival	Colonoscopy (painless)	Colon polyps Endoscopic suction snare resection	Endoscopy room 5	Colonic polyps	Treatment (EMR)	1. (Cecal) tubular adenoma, low grade (Transverse colon) tubular adenoma, low-grade	Insertion time :3 BBPS: LC:2+TC:3+RC:3= 9 The ileocecal valve was lip-shaped, the opening of the appendix was clear, and there was no erosion and ulceration or new growth. A polyp was found in the cecum, Yamada type I, about 1.0cm in size, and the surface mucosa was lobulated. After the base injection of epinephrine saline, it was raised well. Yamada type II, about 0.8cm in size, had smooth surfa…	Cecum, 1cm	Tubular adenoma	Give 0.8 to the transverse colon	Tubular adenoma							3	9	yes
247	female	At age 82, April	1079272		2024-03-22 12:05:00	Never smoked	Never drank alcohol	1级亲属＜60岁确诊肠癌	have	4.68	1.11	3.47	no	no	no	5.5	158	52.5		III	Never used before.	Follow-up for history of colon cancer/polyps			Colonoscopy (painless)	Multiple colon polyps Cold snare resection of 4 Colon postoperative Colonic diverticulum	Endoscopy room 1	Colonic polyps	Treatment (EMR)	(Hepatic flexure polyp) Tubular adenoma, GI (transverse colon polyp near hepatic flexure) tubular adenoma, GI (transverse colon 2) consistent with hyperplastic polyp (transverse colon 3) Tubular adenoma, GI	Time to enter the endoscope: 3BBPS: LC:1+TC:3+RC:2= 6. There was a lot of fecal water in the intestinal cavity, which affected the observation There was no obvious abnormality in the terminal ileum. The ileocecal valve was lip-shaped, the opening of the appendix was clear, and no erosion and ulcer or neoplasm was observed. There was a diverticulum in the cecum with the size of 0.5cm, and the inte…	Hepatic flexure	Tubular adenoma	Transverse colon	Tubular adenoma	Transverse colon	Hyperplastic polyps	cross	Tubular adenoma			3	6	yes
248	male	At age 82, April		128282980	2023-05-05 10:41:00								have	have	have						Currently taking	Change in bowel habits			Colonoscopy (general)	Multiple erythema on rectum Poor bowel preparation	Endoscopy room 6	No abnormalities seen	Examination	Focal chronic inflammation of the (rectum) large bowel mucosa with interstitial edema and gland atrophy	Entry time: 3BBPS: LC:2+TC:2+RC:1= 5 There were many solid feces in the intestinal cavity, covering the mucosa, and the ileocecal valve was lip-shaped. The appendix was clear, the opening of the appendix was diffuse punctate erythema near the rectum and anus, and a little mucus attachment could be seen. The vascular network was still visible											3	5	yes
249	male	82 years old in May	1148629		2023-12-05 13:50:00	Never smoked	Never drank alcohol	no		3.56	0.95	2.35	have	no	have		170	55		III	Never used before.	Change in bowel habits	No complications	Survival	Colonoscopy (painless)	Multiple polyps in the colon Cold snare resection was performed in 2 cases and forceps removal in 3 cases	Endoscopy Room 4	Colonic polyps	Treatment	(ascending, transverse, sigmoid) tubular adenoma, GⅡ (hepatic flexure) focal chronic inflammation of the mucosa of the large intestine (Ascending colon) tubular adenoma, GⅠ	Insertion time :2 BBPS: LC:2+TC:3+RC:2= 7 The ileocecal valve was lip-shaped, the opening of the appendix was clear, and there was no erosion and ulceration or neoplasm. A total of 5 Is polyps (0.3-0.6cm in size) were found in the ascending colon, hepatic flexure, transverse colon and sigmoid colon. The openings of the glands were type II-IIIl and the colors were similar to the surrounding. The s…	There were 5 polyps, the largest of which was 0.6cm	Tubular adenoma									2	7	yes
250	female	82 years old in May	1142357		2023-09-13 15:53:00	Never smoked	Never drank alcohol	no		2.85	1.06	1.97	have	no	no		158	46		III	Currently taking	Positive fecal occult blood	No complications	Survival	Colonoscopy (painless)	Colonic polyps Nature TBD	Operating room	Juvenile polyps	Examination	Juvenile polyps	Lens entry time: 10BBPS: LC:2+TC:2+RC:1=5 The IP-shaped polyp was about 2.0cmx2.5cm in size. The surface was erosive and red, and erosion could be seen. The surface structure could not be observed after flushing. Part of the mucosa was affected, and the rest of the colon showed no obvious abnormalities	The transverse colon was 2.5cm	Juvenile polyps									10	5	yes
251	female	82 years old in May		101822068	2022-05-31 09:47:00				have	5.57	1.13	3.69	have	no	no						Never used before.	Change in bowel habits			Colonoscopy (general)	Multiple polyps in colon (2 forceps removed, 1 cold cut)	Endoscopy room 6	Polyps	Examination	1. Chronic inflammation of the mucosa (cecum), melanosis of the colon 2. (hepatic flexure) chronic inflammation of mucosa with interstitial edema, melanosis coli 3. (Sigmoid colon) tubular adenoma, low grade	Insertion time: 5 BBPS: LC:2+TC:0+RC:0= The ileocecal flap was lip-shaped, the opening of the appendix was clear, and there was no erosions and ulcers or new growth. A 0.3*0.4cmIs polyp was found in the cecum and the hepatic flexum of the ascending colon, with smooth surface and similar color. The orifice of the gland was type IIIL, and the wound was completely removed after snare ligation, with …	Ascending colon	Chronic mucositis	Sigmoid colon	Tubular adenoma							5	Data missing	yes
252	female	82 years old in May		101425242	2024-06-07 11:34:00	Never smoked	Never drank alcohol	no	no	4.31	1.46	2.73	no	no	no		168	75		II	Never used before.	Follow-up for history of colon cancer/polyps			Colonoscopy (painless)	Colonic polyps (forceps removed)	Endoscopy room 6	Colonic polyps	Examination	Hyperplastic polyps	Entry time: 6 BBPS: LC:1+TC:2+RC:1= 4 Poor bowel preparation The ileocecal valve was lip-shaped, the opening of the appendix was clear, and no erosion or ulceration or new growth was observed 30-35cm from the anus. Multiple 0.2-0.4cmIs, finger-like polyps were found in the sigmoid colon with smooth surface and the color was the same as the surrounding. No erosion, ulcer or neoplasm was observed	Sigmoid colon	Hyperplastic polyps									6		yes
253	male	82 years old in May		1003845495	2024-05-21 12:14:00								no	no	no		158	50		III	Never used before.	Abdominal pain or distension			Colonoscopy (general)	No abnormalities were found in the colonic mucosa	Endoscopy room 3	No abnormalities seen	Examination	no	Mirror entry time: 17 BBPS: LC:2+TC:2+RC:2= 6 The ileocecal flap was lip-shaped, the opening of the appendix was clear, and no erosion or ulcer or neoplasm was observed. The colonic mucosa was smooth, the vascular texture was clear, and the plica of semilunaris was intact, and no erosion, ulcer or neoplasm was observed											#VALUE!		yes
254	male	82 years old in May		105160619	2022-04-18 09:30:00					4.31	0.77	2.99	have	have	have							hematochezia			Colonoscopy (general)	Multiple polyps in the colon To be excised and forceps removed Melanosis of colon Poor bowel preparation	Endoscopy room 3	Polyps, melanosis	Examination	no	Entry time: 4BBPS: LC:2+TC:2+RC:2=6 Solid feces were scattered in the intestinal cavity, covering the mucosa, slightly influencing the observation of the ileocecal valve was lip-shaped. The opening of the appendix was clear. There were more than ten IS-type polyps scattered in the ascending colon, hepatic flexure, transverse colon, descending colon, sigmoid colon, and rectus sigmoid junction, abo…	More than 10 polyps										4	6	yes
255	male	At 82 years old in June	1128994		2022-12-08 10:30:00	Smoking now	Are drinking alcohol	no	no				have	no	no		175	62			Never used before.	Change in bowel habits	No complications	Survival	Colonoscopy (general)	Multiple polyps of the colon (to be resected) Melanosis of colon	Endoscopy room 6	, melanosis	Examination	Ascending: tubular adenoma, from anus 30: sessile serrated polyp, 26: hyperplastic polyp, 2: large bowel mucosa, severe cauterization.	Entry time: 12 BBPS: LC:1+TC:2+RC:3= 6 The ileocecal valve was lip-shaped, the opening of the appendix was clear, and no erosion or ulceration or neoplasm was observed. About 30cm from the anus, two 0.8-0.7cmIs polyps were found at the descending B junction, with smooth surface and clear boundary, and the opening of the glandular duct was IIIL. A 0.5*0.8cmIs polyp with smooth surface and clear bo…	l	Tubular adenoma	Descending colon	Sessile serrated polyp	Straight B junction	Hyperplastic polyps					#VALUE!	6	yes
256	male	At 82 years old in June	1117135		2022-07-01 12:06:00	Never smoked	Never drank alcohol	no		4.23	0.82	2.66	have	no	have	7.7	172	71		II	Never used before.	Abdominal pain or distension	No complications	Survival	Colonoscopy (general)	Ascending colon cancer Multiple polyps in the colon Multiple LSTS in the colon pending pathology	Endoscopy room 6	Colon cancer, polyps	Examination	Adenocarcinoma (ascending colon), melanosis Adenocarcinoma and lower grade tubular adenoma were found in the sigmoid colon (Sigmoid) tubular adenoma, low grade (margin undetermined)	Entry time: 11BBPS: LC:2+TC:2+RC:2= 6 With the hook-pulled method, the endoscope was inserted 85cm into the ascending colon, but the entry was not smooth. There was a protruding mass in the ascending colon, with irregular and lobulated surface, uneven mucosa, disordered structure and narrow lumen, and the endoscope could not pass through the ascending colon. IIIl type of glandular orifice; In the…	l	Adenocarcinoma	Sigmoid 1.5	Tubular adenoma	Sigmoid colon	Adenocarcinoma					11	6	Intestinal obstruction
257	male	82 in July	1157806		2024-04-09 15:26:00	Smoking now	Never drank alcohol	no	no	4.12	0.42	2.35	have	no	no		160	55		III	Never used before.	hematochezia	No complications	Survival	Colonoscopy (painless)	The nature of ulcerated carcinoma of the rectum is unknown It is possible to be malignant Poor bowel preparation	Endoscopy room 6	Rectal cancer	Examination	Low grade (rectal) carcinoma with necrosis	The hook-pull method was used to enter the endoscope through the cavity until the end of the ileum was 25cm from the anus. The endoscope was successfully entered, but a large amount of formed feces in the intestinal cavity could not be continued to enter the endoscope An ulcerated mass was found 7-11cm from the anal verge, occupying 3/4 of the perianal wall, with a slightly uneven bottom covered …	Rectum	Poorly differentiated carcinoma									Failure	Data missing	Poor bowel preparation prevented completion.
258	female	82 in July	1127621		2024-02-02 11:00:00	Never smoked	Never drank alcohol	no	have	3.29	1.3	1.53	have	have	have	8.1	156	55		III	Used intermittently	Abdominal pain or distension	No complications	Survival	Colonoscopy (painless)	Colonic polyps, forceps removed Poor bowel preparation	Endoscopy room 3	Colonic polyps	Examination	Hepatic flexure polyps: Hyperplastic polyps	Entry time: 27 BBPS: LC:1+TC:2+RC:1= 4 There is a lot of fecal water in the intestinal cavity, which seriously affects the entry and observation There was no obvious abnormality in the terminal ileum. The ileocecal valve was lip-shaped, the opening of the appendix was clear, there was no erosion and ulcer and new growth in the hepatic flexure. There was an IS-type polyp, 0.4*0.3cm in size, simila…	Hepatic flexure	Hyperplastic polyps									#VALUE!	4	yes
259	female	82 Sept	1132291		2024-01-25 13:49:00	Never smoked	Never drank alcohol	no		4.27	1.39	2.58	have	have	no		158	70		III	Currently taking	Follow-up for history of colon cancer/polyps			Colonoscopy (painless)	Colon polyps Cold excision and forceps	Endoscopy Room 2	Colonic polyps	Treatment (EMR)	Tubular adenoma (transverse colon), GI (Descending colon) focal chronic inflammation of the mucosa of the large intestine	Lens entry time: 10 BBPS: LC:2+TC:2+RC:2= 6 The ileocecal flap was lip-shaped and the opening of the appendix was clear without erosion or ulceration or neoplasm. A polyp of transverse colon, type I Yamada, about 0.6cm in size, with smooth surface mucosa was removed cold after ligation with a ligation device. The remaining biopsy forceps showed smooth colonic mucosa, clear vascular texture, intac…	Transverse colon 0.6	Tubular adenoma	Descending colon 0.3	Hyperplastic polyps							#VALUE!	6	yes
260	female	82 Sept	1129562		2023-03-06 11:45:00	Never smoked	Never drank alcohol	no	no	3.09	0.89	1.96	no	no	no		145	55		II	Never used before.	anemia	No complications	Survival	Colonoscopy (painless)	Multiple polyps of the colon (the nature of polyps in sigmoid colon is to be determined) Electronic endoscopic colon polyp suction snare resection (EMR2) Three were resected cold	Endoscopy room 1	Colonic polyps	Examination	(transverse colon near hepatic flexure) tubular adenoma, GI (middle segment of transverse colon) tubular adenoma, GI (Descending colon near hepatic flexure) tubular adenoma, GI (Descending colon near hepatic flexure) tubular adenoma, GI (sigmoid colon 25cm) villus-tubular adenoma, GII	Clean the intestine, lubricating the intestine, electronic colonoscopy with a transparent cap on the front end, inserted from the anus into the anus, digital examination negative entry time: 7 BBPS: LC:1+TC:2+RC:2= 5 The ileocecal valve was lip-shaped and the appendix opening was clear. There was no erosion or ulcer and neoplasm. One polyp was found in the transverse colon near the hepatic flexur…	3 transverse and descending colons with a maximum of 0.6	Tubular adenoma	1cm descending colon	Tubular adenoma	Sigmoid colon	Tubulovillous adenoma					7	5	yes
261	male	82 Sept		1002774152	2023-04-23 09:15:00	Never smoked	Never drank alcohol			4.79	0.98	3.12	no	no	have			65				Follow-up for history of colon cancer/polyps			Colonoscopy (general)	Rectal polyposis - Forceps net	Endoscopy room 6	Colonic polyps	Examination	(Rectum) consistent with hyperplastic polyps	Endoscope entry time: 5 BBPS: LC:1+TC:1+RC:2= 4 The ileocecal valve was lip-shaped, the opening of the appendix was clear, and there was no erosion and ulceration or new growth. At 8cm of the rectum, an IS-type polyp with a diameter of 0.3cm and a smooth surface was found. No erosion, ulcer or neoplasm was observed	Rectum	Hyperplastic polyps									5	4	yes
262	female	83	1119847		2023-01-12 11:13:00	Never smoked	Never drank alcohol	no	have	5.55	1.21	3.79	no	no	no		152	61		III	Never used before.	Change in bowel habits			Colonoscopy (painless)	Rectal surgery Inflammation of the colon, pending pathology Poor bowel cleanliness	Endoscopy room 1	Colon infection	Examination	Superficial intestinal mucosa, lamina propria with chronic inflammatory cell infiltration and glandular atrophy.	The anastomosis was found 10cm from the anal verge. The surface mucosa was smooth, the lumen was slightly narrow, and the endoscope could pass through. The remaining parts of the transverse colon, descending colon and sigmoid colon were not smooth, the vascular network was not clear, punctate erythema and spontaneous bleeding could be seen											Failure	Data missing	yes
263	female	83	1104905		2021-11-01 13:55:00	Never smoked	Never drank alcohol	A first-degree relative over 60 years old was diagnosed with colorectal cancer.	no	4.5	1.3	3.04	have	no	no		146	49		II	Never used before.	hematochezia			Colonoscopy (painless)	Colon cancer of undetermined nature Multiple polyps in the colon	Endoscopy room 5	Colon cancer T2N0MX	Examination	(Sigmoid colon) Metaplastic tubular adenocarcinoma pending immunohistochemistry	Entry time: 6 Bowel cleanliness grade 3 Two Ip type polyps, about 0.4-0.6cm in size, with smooth surface and similar color, were found in the ascending colon near the hepatic flexure. Three ISISP polyps (0.5-1.0cm in size) were found in the transverse colon, and one ISP-type polyp (0.4x0.6cm) was found in the descending colon about 35cm from the anus with smooth surface. Three ISP-type polyps (25…	Nine polyps were found		Sigmoid colon	Adenocarcinoma							6	3	yes
264	female	83	1096254		2021-05-27 12:06:00	Never smoked	Never drank alcohol	no	have	2.9	1.97	1.24	have	have	no		150	66		II	Currently taking	hematochezia			Colonoscopy (painless)	Ascending colon bulge, Cysts may Rectal bulge, SMT	Endoscopy Room 2		Examination	no	Entry time: 8 bowel cleanliness grade 1 The ileocecal flap was lip-shaped and the opening of the appendix was clear without erosion or ulceration or new growth. There was a raised lesion with a size of 1.8*1.2cm on the opposite side of the ileocecal flap at the beginning of the ascending colon. The surface was smooth, with a sense of transparency and soft texture. The surface mucosa was smooth, t…											8	1	yes
265	male	83	1081862		2020-08-25 14:09:00	Has quit smoking	Are drinking alcohol	no	have	3.4	0.76	1.7	have	have	have	5.5	168	54		III	Used intermittently	Positive fecal occult blood			Colonoscopy (painless)	The nature of colon cancer remains to be determined Multiple polyps in the colon	Endoscopy room 3	Colon cancer (T4NxMx)	Examination	Immunohistochemical results of tubovillous adenocarcinoma (hepatic flexus) : SATB2 (+), CDX-2 (+), Villin (+), MLH1 (+), MSH2 (+), MSH6 (+), PMS2 (weakly +), HER-2 (0), Ki-67 (85%+), P53 (missense mutation)	Entry time: 6 Intestinal cleanliness grade 3 The tumor was about 2.5cm in diameter, with irregular surface shape, erosion in the center, and covered with dirt. The boundary was clear and the surrounding mucosa was uneven. The tumor occupied about 2/3 of the intestinal cavity, and the lumen was narrow, and the endoscope could still pass. One ISP-type polyp was located about 35cm from the descendin…	Hepatic flexure	Adenocarcinoma	Four polyps were found								6	3	yes
266	female	83	1074937		2020-01-03 09:26:00	Never smoked	Never drank alcohol	no	no	5.15	1.41	3.22	no	no	no		160	70		II	Never used before.	hematochezia			Colonoscopy (painless)	The nature of colon cancer remains to be determined Multiple polyps in the colon	Endoscopy room 3		Examination	Adenocarcinoma (of the ileocecal region), pending immunization	Entry time: 3 Bowel cleanliness grade 2 A mass with a diameter of 3.0cm was found under the ileocecal valve, with irregular surface shape and disappearance of structure. There was an ulcer in the center, covered with dirty moss, and with a clear boundary. The size of the lesion was about 0.8x1.0cm, and the color of the surface was the same as that of the surrounding colon segment	Ascending colon	Adenocarcinoma	l		Hepatic flexure 1cm						3	2	yes
267	female	83	1064686		2019-10-12 11:57:00	Never smoked	Has stopped drinking	no	no	4.77	1.07	2.78	have	no	no		144	46			Never used before.	hematochezia			Colonoscopy (general)	Colonic polyps Cold endoscopic resection of colonic polyps Endoscopic hemostasis and disposal Melanosis of colon Internal hemorrhoids	Endoscopy room 5		Examination	Tubular adenoma (descending colon), low grade	Lens entry time: 4 Intestinal cleanliness grade 3 The ileocecal flap was lip-shaped, the opening of the appendix was clear, and there was no erosion or ulceration or new growth. An Isp polyp, 0.5cm in diameter, pink and smooth, was seen in the descending colon. The wound was closed with titanium clips. After washing, there was no active bleeding. The colon mucosa was smooth and brown, the vascula…	cross	Tubular adenoma									4	3	yes
268	female	83	1061110		2019-05-20 15:06:00	Never smoked	Never drank alcohol	no	no	3.62	1.29	1.89	no	no	no		145	50			Never used before.	Change in bowel habits			Colonoscopy (general)	Multiple erosions in cecum, descending colon and sigmoid colon Inflammation? Multiple polyps in colon, forceps clear	Endoscopy Room 4		Examination	(hepatic flexure) tubular adenoma, low grade (Rectum) chronic inflammation of the polypoid intestinal mucosa with focal active inflammation (Cecum) the intestinal mucosa was infiltrated by chronic inflammatory cells, a few glands were hyperplastic, and the superficial lamina propria was infiltrated by foamy histiocytes	Anal examination was negative and was given Duration of endoscopy: 6 Bowel cleanliness grade 3 No abnormal ileocecal valve was found at the end of the ileum. The opening of the appendix was clear. Scattered punctate erosions were observed in the cecum near the appendix, and the surrounding mucosa was red. The biopsy forceps showed clear hepatic flexure, descending colon and sigmoid colon The colo…	Hepatic flexure	Tubular adenoma	4.	Chronic mucositis							6	3	yes
269	male	83	1053737		2019-01-31 10:01:00	Never smoked	Never drank alcohol	no	no	4.69	1.11	3.15	have	have	have	6.3	175	72		III	Used intermittently	Positive fecal occult blood			Colonoscopy (painless)	Ascending colon with stenosis Colon cancer may	Operating room		Examination	Tubular adenocarcinoma (ascending colon) pending immunohistochemical diagnosis	Time of endoscopy entry: 5 Bowel cleanliness grade 2 Due to the stenosis of the intestinal cavity, the endoscope could not pass through the stenosis, and the annular stenosis of the intestinal cavity was found. The surface mucosa was nodular and uneven, accompanied by ulcer formation, spontaneous bleeding and contact bleeding	l	Adenocarcinoma									5	2	Intestinal obstruction
270	male	83	1053394		2019-01-08 16:59:00	Has quit smoking	Are drinking alcohol	no	have	2.49	1.25	1.04	have	no	have	10.4	174	90		III	Used intermittently	Follow-up for history of colon cancer/polyps			Colonoscopy (general)	Multiple colon polyps, EMR3, the rest biopsy + cold resection	Endoscopy Room 2		Treatment (EMR)	1 (ascending colon 1) Tubular adenoma, low grade; 2 (ascending colon 2) tubular adenoma, low grade; 3 (hepatic flexure) tubular adenoma, low grade; 4 (transverse colon 1) Tubular adenoma, low grade; 5 (transverse colon 2) Tubular adenoma, low grade; 6 (Descending colon 1) Tubular adenoma, low grade; 7 (descending colon 2) Tubular adenoma, low grade; 8 (descending colon 3) Tubular adenoma, low gra…	Entry time: 12 Rectal digital examination was negative. Bowel cleanliness was grade 2 The ileocecal valve was lip-shaped, the opening of the appendix was clear, and two 0.4-0.5cmIs polyps were found in the ascending colon. Biopsy forceps showed two adjacent 0.5*0.5cm and 0.8*0.8cmIs polyps in the clear hepatic flexure. There was a 1.2*1.0cmIs polyp located at 65cm from the transverse colon to the…	9 polyps	Tubular adenoma									#VALUE!	2	yes
271	female	83	1050399		2018-12-29 14:54:00	Never smoked	Never drank alcohol	no	no	4.37	0.73	2.57	no	no	no	4.8					Never used before.	hematochezia			Colonoscopy (general)	Rectum, cancer possible Associated bleeding Multiple polyps in the colon Poor bowel cleanliness	ERCP	Rectal cancer	Examination	Tubular adenocarcinoma	Go into Mirror time: 6 The ileocecal valve was lip-shaped, the opening of the appendix was clear, there was no erosion and ulcer or active bleeding in the cecum, and brown feces covered the intestinal wall in the ascending colon and the right half of the transverse colon. After local irrigation, the mucosa was smooth, and no abnormal or active bleeding was observed. There were several IS_X000D__X…	Rectum	Adenocarcinoma	There were six polyps								6	Data missing	yes
272	female	83	1048055		2018-10-10 16:19:00	Never smoked	Never drank alcohol	no	have	5.2	2.2	3	have	have	have		155	66			Never used before.	Change in bowel habits			Colonoscopy (general)	Melanosis of the colon	Endoscopy Room 2		Examination	no	Entry time: 8 intestinal clearance Cleanliness grade 3 The ileocecal valve was lip-shaped, the opening of the appendix was clear, and no erosion or ulcer or neoplasm was observed. The colonic mucosa was brown and smooth, the vascular texture was clear, and the plica of semilunaris was intact											8	3	yes
273	male	83	1038906		2019-08-22 13:25:00	Has quit smoking	Are drinking alcohol	no	have	3.92	1.25	2.38	have	have	no	5.7	170	60		III	Currently taking	Positive fecal occult blood			Colonoscopy (painless)	Colonic diverticula	Endoscopy room 1		Examination	no	Lens entry time: 4 Intestinal cleanliness level 2 The hook-draw method was used to enter the endoscope through the cavity to the end of the ileum. The ileocecal valve was lip-shaped, the opening of the appendix was clear, and no erosion and ulcer and new growth of the transverse colon were observed There was a diverticulum with an opening size of about 0.2x0.3cm, and no erosion or bleeding was ob…											4	2	yes
274	male	83	1030316		2017-11-29 14:34:00	Never smoked	Never drank alcohol	no	no	3.94	0.79	2.43	no	no	no		168	55		II	Never used before.	Abdominal pain or distension			Colonoscopy (general)	After colonic stent implantation Colonic polyps To be electrocuted	Endoscopy room 7		Examination	Tubular adenoma	Lens entry time: 10 intestinal cleaning Degree 2 The patient had abdominal pain and could not tolerate the entry of the endoscope. Then the descending colon was 35-38cm away from the anus, and the mucosa was circular congestion and erosion, feces and white moss were observed on the surface, metal stents were seen at the bottom, and bleeding was observed. The ISP-type polyp was about 1.2x0.8cm in …	Sigmoid colon	Tubular adenoma									10	2	The patient cannot tolerate.
275	female	83	1027381		2017-08-16 10:23:00	Never smoked	Never drank alcohol	no	have	5.34	0.34	2.83	no	no	no		148	42.5			Never used before.	Change in bowel habits			Colonoscopy (general)	Multiple polyps in the colon One was clipped and the other was to be resected by electrotomy	Endoscopy room 8		Examination	(Hepatic flexure of transverse colon) tubular adenoma, low grade	Entry time: 6 Bowel cleanliness grade 2 A Yamada type I polyp with a size of 0.3cmx0.3cm was found at 62cm from the hepatic flexure of the transverse colon to the anus. The surface was smooth and the color was similar to the surrounding without erosion. A Yamada type I polyp with a size of 1.0cmx0.8cm was found at 60cm from the hepatic flexure of the transverse colon to the anus. The biopsy force…	Transverse 1cm	Tubular adenoma									6	2	yes
276	male	83	1020174		2017-04-21 10:20:00	Never smoked	Never drank alcohol	no	have				have	have	have		169	72.5			Currently taking	Follow-up for history of colon cancer/polyps			Colonoscopy (general)	After colostomy Rectal cancer Ileocecal cancer to be investigated Colonic polyps, multiple	Endoscopy room 10		Examination	1. (Rectal) adenocarcinoma, metaplasia 2. (Hepatic flexure of colon) tubular adenoma, low grade 3. (ileocecal mass) adenocarcinoma, moderate 4. (transverse colon) tubular adenoma, low-grade	There was a mass occupying the ring 10cm into the scope, with uneven surface nodules, visible ulcer formation, covered with filth, easy to bleeding in contact. Four biopsies were made, with fragile texture and poor elasticity. A small amount of blood oozed after biopsy, and local spraying of thrombin 1000U The intestinal cleanliness was poor, and the mucosal observation was not satisfactory. A bu…	Rectum	Adenocarcinoma	Hepatic flexure	Tubular adenoma	Ascending colon	Adenocarcinoma	Transverse colon	Tubular adenoma			Failure	Data missing	yes
277	male	83	1007377		2016-05-06 10:13:00	Never smoked	Never drank alcohol	no	no	2.65	0.99	1.47	have	no	no		164	70		III	Used intermittently	Abdominal pain or distension			Colonoscopy (painless)	Colonic mucosal protuberant lesions, high-grade epithelial rheology, adenoma ESD+ electrocoagulation hemostasis	Endoscopy Room 2			(Ascending colon mucosal bulge) ESD resection specimen: low-grade villous tubular adenoma with serrated structure; The focal high-grade intraepithelial neoplasia was mostly flat cloth, and no residual lesions were found at the two margins of the specimen	A raised lesion, about 3x6cm in size, was found in the ascending colon at a distance of 62cm from the anus. The surrounding mucosa was slightly hyperemia and edema. The edge of the lesion was marked with Dual knife. The Dual knife was cut along the edge of the lesion, and the Dual knife and IT Nano knife were used alternately for submucosal dissection until the lesion was completely dissected. Th…	l	Villous tubular adenoma, focally high-grade									Data missing	Data missing	yes
278	male	83	1002852		2019-03-26 11:37:00	Never smoked	Never drank alcohol	no	have	3.34	0.79	2.02	have	None	have		173	81		III	Currently taking	Follow-up for history of colon cancer/polyps	No complications	Survival	Colonoscopy (general)	Multiple polyps in colon Four were clipped and the remaining one was to be resected by transurethral resection	Endoscopy room 5		Examination	Tubular adenoma (transverse colon), low grade (Descending colon) tubular adenoma, low grade (Descending colon) tubular adenoma, low grade Chronic inflammation of the polypoid intestinal mucosa (descending colon)	Entry time: 6 intestinal cleansing Degree 3, local 4 Five polyps scattered from transverse colon to descending colon were unblocked. Four of the smaller polyps were type Is, with a diameter of 0.3-0.5cm. The largest one was located in the descending colon, type Isp, with a diameter of 1.2cm, and type IIIL of surface glands. The color of the polyps was roughly the same as that of the surrounding c…	3 descending colon	Tubular adenoma	Descending colon	Tubular adenoma							6	4	yes
279	female	83		2205881	2019-08-05 13:38:00								no	no	no						Never used before.	hematochezia			Colonoscopy (general)	Appendix mouth erythema, Erosions Inflammation	Endoscopy Room 2		Examination	Chronic inflammatory cell infiltration of the intestinal mucosa with focal active inflammation	Duration of endoscopy: 5 intestinal cleanness grade 2 The hook-pull method was used to enter the endoscope through the cavity to the end of the ileum. The ileocecal valve was lip-shaped, the opening of the appendix was clear, and a few flaky erythema and erosion were seen in the surrounding mucosa The colonic mucosa was smooth, the vascular texture was clear, and the plica of semilunar was intact…											5	2	yes
280	male	83		102157178	2018-09-19 10:48:00	Has quit smoking	Never drank alcohol	no		4.74	0.45	3.32	have	no	no		162	65		II	Never used before.	Change in bowel habits			Colonoscopy (painless)	Colon LST-G (M) Colonic polyps Clamp clean	Endoscopy room 1		Examination	Tubular adenoma (sigmoid colon), low grade	Lens entry time: 9 Intestinal cleanliness level 2 The hook pull method was used to enter the endoscope through the cavity to the end of the ileum. After entering the endoscope, a lateral developing polyp was found on the opposite side of the ascending colon above the ileocecal valve. The surface was granular, and a nodule was seen, which was similar to the surrounding color. The surface was smoot…	Sigmoid colon	Tubular adenoma									9	2	yes
281	male	83		102163458	2019-05-24 12:09:00								have	have	no						Used intermittently	Positive fecal occult blood			Colonoscopy (general)	Sigmoid colon nature unknown, cancer?	Endoscopy room 1		Examination	(Sigmoid colon) intramucosal adenocarcinoma, tubular villous, can not exclude higher grade lesions please combine with clinical	Entry time: 6 Intestinal cleanliness grade 2 The ileocecal valve was lip-shaped, the opening of the appendix was clear, no erosion and ulceration or new growth was observed. A circumferential cauliflowerlike mass was found 25cm-30cm from the anus, with surface congestion, erosion and spontaneous bleeding, well circumscribed, white spot at the root, lumen stenosis, endoscopy barely passed, biopsy …	Sigmoid colon	Adenocarcinoma									6	2	yes
282	female	83		124751417	2019-07-16 14:09:00	Has quit smoking	Never drank alcohol	no		3.47	1.58	1.93	have	no	no		151	60		II	Never used before.	hematochezia			Colonoscopy (general)	Straight B Junction Cancer possible Multiple polyps in the colon	Endoscopy room 5		Examination	(Straight-B junction) tubular adenocarcinoma, medium	Entry time: 6 intestinal Tract cleanliness grade 3 The ileocecal valve was clearly shown in a lip-shaped appendiceal opening. A near circumferential mass 12-16cm away from the anus was seen in the rectosigmoid junction, with irregular surface shape, depression and erosion in the center, covered with dirty yellow and white moss, easy bleeding in contact, clear boundary, uneven surrounding mucosa, …	Rectum	Adenocarcinoma		Sigmoid colon		Rectum					6	3	yes
283	male	83		102170052	2019-12-25 11:33:00								no	no	no							Abdominal pain or distension			Colonoscopy (general)	For multiple polyps in the colon, 3 were removed cold and 1 was clamped clean	Endoscopy room 8		Cold cut	1 (transverse colon) tubular adenoma, low grade; 2 (descending colon) tubular adenoma, low grade; 3 (sigmoid 1) tubular adenoma, low grade; 4 (sigmoid) tubular adenoma, low grade	Entry time: 8 Bowel cleanliness grade 2-3 There was no obvious abnormality in the terminal ileum. The ileocecal valve was lip-shaped, the opening of the appendix was clear, and there was no erosion and ulceration or new growth. A 0.5cm IS-type polyp was found in the transverse colon, with smooth surface and color, and the biopsy was soft. A 0.8×0.6cm IS-type polyp was found in the sigmoid colon 4…	cross	Tubular adenoma	drop	Tubular adenoma	Sigmoid colon	Tubular adenoma	Sigmoid colon	Tubular adenoma			8	3	yes
284	male	83		115499447	2018-03-29 11:31:00	Never smoked	Are drinking alcohol	no	have	2.94	0.3	1.23	have	no	no	6.2	168	57			Used intermittently	Change in bowel habits			Colonoscopy (general)	Intestinal multiple erosion, white moss nature to be determined Infection? Antibiotic relevance? Multiple polyps in colon, forceps removed	Endoscopy room 5		Examination	1. (Ileocecum) colonic mucosa, the lamina propria showed acute and chronic inflammatory cell infiltration, scattered eosinophils and lymphohistiocytosis 2 (descending colon) tubular adenoma, low grade 3 (Rectosigmoid junction) colon mucosa, loose lymphoplasmacytic infiltration, scattered eosinophils and neutrophils in the lamina propria 4 (straight-B junction) tubular adenoma, low grade, with ero…	Entry time: 12 Intestinal cleanliness 3 -Grade 4 There was no obvious abnormality in the end of the ileum. There were many solid feces in the intestinal cavity, which affected the observation that the ileocecal valve was lip-shaped, the appendix opening was clear, and there was no erosion and ulcer or neoplasm. Multiple flaky yellow and white moss attached to the whole colorectal mucosa, scattere…	drop	Tubular adenoma	There were 3 rectus B junction polyps	Tubular adenoma							12	4	yes
285	male	83		102835763	2018-10-19 10:23:00	Never smoked	Never drank alcohol	no	have	2.55	0.72	1.6	have	no	have	9.2	170	68		III	Currently taking	hematochezia			Colonoscopy (general)	Colonic polyps, cold removal Rectal cancer Possible Melanosis of colon	Endoscopy room 5		Examination	1 (descending colon) tubular adenoma, low grade; 2 (rectal) tubular adenocarcinoma	Entry time: 14 intestinal cleansing Degree 3 No abnormality was found at the end of the ileum. Yamada type I polyp (0.6cmx0.6cm) was found at 40cmcm from the anus. After cold resection, a mass was found 10-17cm from the anus, with a feeling of fullness, occupying 3/4 of the intestinal cavity, and the intestinal cavity was narrow. There was contact bleeding. The surface was covered with white mucu…	drop	Tubular adenoma	Rectum	Adenocarcinoma							14	3	yes
286	male	83		128283288	2019-02-25 15:43:00	Never smoked	Never drank alcohol	no	have	2.2	0.86	1.08	have	have	no	6.7	180	74		III	Currently taking	Follow-up for history of colon cancer/polyps			Colonoscopy (painless)	Colonic polyps Electrocision	Endoscopy room 3		Treatment (EMR)	1 (ascending colon) tubular adenoma, low grade; 2 (transverse colon 1) tubular adenoma, low grade; 3 (transverse colon 2) tubular adenoma, low grade; 4 (transverse colon 3) Tubular adenoma, low-grade	Entry time: 8 Bowel cleanliness Grade 2 The orifice of the appendix was clear, and there was no erosion and ulceration or neoplasm. There was one polyp in the ascending colon (Yamada type I, about 1.2cm in size) and three polyps in the transverse colon (Yamada type I, about 1.0cm, 0.8cm and 1.2cm in size). The surface mucosa of the above four polyps was smooth. 0.01% kidney was injected into the …	l	Tubular adenoma	3 transverse ones	Tubular adenoma							8	2	yes
287	male	83		100226239	2018-07-31 16:39:00	Has quit smoking	Are drinking alcohol	no	have	4.43	1.45	3.79	have	no	have	5.8	168	62		II	Never used before.	Change in bowel habits			Colonoscopy (painless)	Rectal-borrmann type III carcinoma is possible Rectal polyps, EMR	Endoscopy room 1		Treatment (EMR)	1 (rectal) villous tubular adenoma immunohistochemical results: MSH6 (+), MSH2 (+), MLH1 (+), PMS2 (+), P53 (+), Ki-67 (70%+) 2 (rectal) tubular adenocarcinoma to be diagnosed by immunohistochemistry Additional pathological diagnosis: 2 (rectal) tubular adenocarcinoma immunohistochemical results: MSH6 (+), MSH2 (+), MLH1 (+), PMS2 (+), P53 (mutant +), Ki-67 (hot spot 90%+).	Entry time: 1 Intestinal cleanliness 2 Grade Twelve cm into the rectum near the rectosigmoid junction, a raised mass, circumferential growth of the lesion, central nodular bulge, local congestion, erosion, shallow ulcer formation, covered with fouling, narrow lumen, the endoscope can not pass through, biopsy of 3 blocks, the texture was friable, the specimen was sent to the anal pathology 6cm sho…	Rectum	Villous tubular adenoma	Rectum	Adenocarcinoma							1	2	Intestinal obstruction
288	female	83		1559325	2017-07-06 12:07:00								have	no	no							Change in bowel habits			Colonoscopy (general)	Sigmoid LST, SSAP? Multiple polyps in the colon, forceps at the end Melanosis of colon	Endoscopy room 8		Examination	1. (Cecum) chronic inflammation of the polypoid colonic mucosa with melanosis 2, (ascending colon) chronic inflammation of the mucosa, polyp formation 3. (Ascending colon) tubular adenoma, low-grade immunohistochemical markers MSH6, MSH2, MLH1, PMS2, P53, Ki-67, please contact the pathology department for payment	Entry time: 6 Intestinal cleanliness grade 3 No obvious abnormalities were found in the terminal ileum. The ileocecal valve was lip-shaped, the opening of the appendix was clear, there was no erosion and ulcer or neoplasm. The colonic mucosa was generally light brown, and the vascular network was not clear, especially in the right hemicolon. There was one 0.3cm Yamada type I polyp in the cecum ne…	l	Chronic mucositis	l	Tubular adenoma	The sigmoid colon was 2.5cm						6	3	yes
289	male	83		102742897	2017-05-25 12:27:00	Never smoked	Never drank alcohol	no	have	3.32	1.53	1.49	have	no	no	5.8	175	83			Currently taking	Follow-up for history of colon cancer/polyps			Colonoscopy (general)	Multiple colon polyps Four were clipped and 1 was excised by electrocision	Endoscopy room 8		Examination	1. Chronic polypoid mucositis of the colon (cecum) 2. (Ascending colon) chronic polypoid mucositis of the colon 3. (transverse colon) tubular adenoma, low grade 4. (transverse colon near splenic flexure) tubular adenoma, low-grade immunohistochemical markers are recommended for diagnosis	Time of endoscopy entry: 15 bowel cleanliness grade 2 The opening of the appendix was clear. One Yamada type I polyp with a diameter of about 0.3cm was seen in the cecum and the ascending colon, and the color was similar to the surrounding. Two Yamada type II polyps with a diameter of 0.3cm and 0.5cm were seen in the middle of the transverse colon and near the splenic flexure. The biopsy forceps …	cross	Tubular adenoma	Transverse colon	Tubular adenoma	Ascending colon 2	Chronic mucositis					15	2	yes
290	female	83		100844162	2021-11-12 09:50:00								have	no	no		160	70		III		Abdominal pain or distension			Colonoscopy (general)	Multiple telangiectasia in the colon	Endoscopy room 3		Examination	no	Lens entry time: 14 Intestinal cleanliness grade 1 The ileocecal valve was lip-shaped, the opening of the appendix was clear, and there was no erosion or ulcer or neoplasm in the terminal ileum. Several telangiectasia were observed in the transverse colon. The colonic mucosa was smooth, the vascular texture was clear, and the plica of semilunar was intact											14	1	yes
291	male	83		113927591	2021-01-07 14:48:00								no	no	no		160	53		I		Follow-up for history of colon cancer/polyps			Colonoscopy (painless)	No abnormalities were found in the whole colonic mucosa	Endoscopy room 3		Examination	no	Lens entry time: 3 Intestinal cleanliness level 3 No abnormal ileocecal valve was found in the terminal ileum. The opening of the appendix was clear, and no erosion or ulcer or neoplasm was observed. The colonic mucosa was smooth, the vascular texture was clear, and the plica of semilunar was intact, and no erosion, ulcer or neoplasm was observed											3	3	yes
292	male	83		117282804	2020-09-28 11:38:00				have	2.78	0.91	1.43	have	no	have	7.2	178	84.5		III	Used intermittently	Positive fecal occult blood			Colonoscopy (painless)	No abnormalities were found in the colonic mucosa	Endoscopy room 5		Examination	no	Entry time: 8 Intestinal cleanliness level 4 The ileocecal flap was lip-shaped, the opening of the appendix was clear, and there was no erosion and ulcer or neoplasm. A large amount of fecal water and formed fecal residue in the intestinal cavity were observed, and the local mucosa was affected											8	4	yes
293	female	83		105283347	2019-04-30 13:54:00	Never smoked	Never drank alcohol	no	no	4.5	1.55	2.86	no	no	no		159	65		III	Never used before.	Elevated tumor markers			Colonoscopy (general)	Melanosis of colon Rectal polyps, forceps clear Metaplastic?	Endoscopy Room 4		Examination	Tubular adenoma	Lens entry time: 5 Intestinal cleanliness 1 Grade No abnormal ileocecal valve lip-shaped, appendiceal opening was clear, no erosion and ulcer or new growth was observed. The colon mucosa was smooth, generally pale brown mottling, vascular texture was clear, and the plica of semilunaris was intact, no erosion, ulcer or new growth was observed. Soft, biopsy forceps clear and visible internal hemorr…	Rectum	Tubular adenoma									5	1	yes
294	female	Oct., 83	1142943		2023-09-14 11:26:00	Never smoked	Never drank alcohol	no	have	3.25	1.48	1.72	have	no	no		147	41.5		III	Used intermittently	hematochezia	No complications	Survival	Colonoscopy (painless)	Melanosis of the colon	Endoscopy Room 4	Melanosis	Examination	no	Lens entry time: 8BBPS: LC:2+TC:3+RC:3= 8 The ileocecal valve was lip-shaped, the opening of the appendix was clear, and no erosion or ulcer or new growth was observed. The colon mucosa was smooth and light brown, the vascular texture was clear, and the plica of semilunaris was intact. There was no erosion, ulcer or new growth											8	8	yes
295	male	Oct., 83	1141291		2023-08-24 11:22:00	Never smoked	Never drank alcohol	no		4.09	0.52	2.26	have	no	no		175	55		III	Currently taking	hematochezia	No complications	Survival	Colonoscopy (painless)	Melanosis of the colon	Endoscopy room 1	Melanosis of the colon	Examination	no	Lens entry time: 3BBPS: LC:2+TC:3+RC:3= 8 The ileocecal valve was lip-shaped, the opening of the appendix was clear, and no erosion or ulcer or neoplasm was observed. The colonic mucosa was smooth and light brown, the vascular texture was clear, and the plica of semilunaris was intact, and no erosion, ulcer or neoplasm was observed											3	8	yes
296	female	Oct., 83	1117146		2022-06-23 15:53:00	Never smoked	Never drank alcohol	no	have	3.93	1.03	2.26	no	no	no		157	60			Currently taking	Change in bowel habits	No complications	Survival	Colonoscopy (general)	Swollen colon Infection?	Endoscopy Room 2	Colon infection	Examination	no	Lens entry time: 3 BBPS: LC:2+TC:2+RC:2= 6 There were a large number of purulent secretions attached to the transverse colon lumen smoothly. Observation after washing showed that the mucosa under the secretions was smooth and the vascular network was clear. Multiple white frontal scars were found in the descending colon, and mucosal edema was found in the sigmoid colon 30cm-15cm from the anus, an…											3	6	Target lesion detected
297	male	83 Nov		115584398	2022-08-01 10:42:00	Never smoked	Never drank alcohol	no					no	no	no		172	63		II	Never used before.	Abdominal pain or distension			Colonoscopy (general)	Multiple polyps in the colon pending electrotomy Multiple diverticula in colon Melanosis of colon	Endoscopy room 6	Colonic polyps, melanosis, diverticula	Examination	Polyps left untreated	Lens entry time: 11BBPS: LC:3+TC:2+RC:2= 7 The ileocecal valve was lip-shaped and the opening of the appendix was clear. There was no erosion, ulcer or neoplasm in the terminal ileum. There was a 1 cMISP-type polyp in the cecum, and a 1 CMISP-type polyp in the ascending colon with a slight depression in the center. There was a 0.6cmIsp polyp located 58cm from the transverse colon to the anus, and…	L 1cm		cross	Sigmoid colon							#VALUE!	7	yes
298	female	Jan., 83	1115456		2022-05-20 14:10:00	Never smoked	Never drank alcohol	no	no	3.9	1.06	2.07	no	no	no		156	52		II	Never used before.	Change in bowel habits	No complications	Survival	Colonoscopy (general)	Space-occupying carcinoma at the straight-B junction Stenosis with bleeding Multiple polyps in the colon Enter the endoscope into the descending colon	Endoscopy room 1	Colon cancer T3N1aM0, polyp	Examination	(direct B junction) metaplastic adenocarcinoma Immunohistochemical results: CK7 (-), CK20 (+), CDX-2 (+), SATB2 (+), P53 (mutant), Ki-67 (hot area about 80%+), Her-2 (0), MLH1 (+), MSH2 (+), MSH6 (+), PMS2 (+) Radical resection specimen of sigmoid colon cancer: 1 (Sigmoid colon) adenocarcinoma, no specific type, low grade, moderate, partly mucinous adenocarcinoma, ulcerative type, size 4.5*3.5*1.…	CO2 gas into the descending colon about 40cm from the anus, the patient could not tolerate it, and the patient did not continue the observation. There were more fecal water in the intestinal cavity, covering the mucosa, and influencing the observation. There were three polyps in the sigmoid colon about 22cm from the anus, 0.4, 0.6, 0.8cm, and the larger one was a surface lobe, and white spots wer…	There were 3 sigmoid colon	Tubular adenoma	Straight B junction	Adenocarcinoma							Failure	Data missing	The patient cannot tolerate.
299	female	Jan., 83		101213132	2023-01-06 15:19:00					4.55	1.03	3.45	have	no	have						Currently taking	hematochezia			Colonoscopy (general)	Rectum not seen Internal hemorrhoids	Endoscopy Room 2	Poor bowel preparation	Emergency department	no	The endoscope was inserted 20cm through the anus, and many formed yellow feces and old blood stains were seen, which still affected observation after filling and flushing. No mass, ulcer or erosion was found in the mucous membrane											Failure	Data missing	Poor bowel preparation prevented completion.
300	female	83 in March		101920128	2023-02-06 12:12:00	Never smoked	Never drank alcohol	no	have	6.1	1.1	3.94	have	no	no	6.2	154	46		III	Never used before.	hematochezia			Colonoscopy (general)	Colon with strictures Cancer possible	Endoscopy Room 4	Colon cancer	Examination	High-grade intraepithelial neoplasia, focal moderately differentiated adenocarcinoma	A circumferential nodular mass was found 18-21cm from the anus. The surface structure disorder disappeared, the small blood vessels were obturated, there was spontaneous bleeding, the boundary was unclear, and white spots were seen at the base. The biopsy was crisp, with poor elasticity and narrow lumen, and the endoscopy could not pass through	Adenocarcinoma										Failure	Data missing	Intestinal obstruction
301	male	Aged 83 in April	1122514		2023-03-24 15:45:00	Never smoked	Never drank alcohol	no	no	3.86	0.8	2.56	no	no	no		168	52		III	Never used before.	Follow-up for history of colon cancer/polyps			Colonoscopy (general)	Colon surgery After abdominal stoma Bowel not prepared	Endoscopy Room 4	Poor bowel preparation	Examination	no	13cm into the anastomosis, the mucosa of the anastomosis was smooth, about 1.2cm in diameter, and there was residual anastomotic nail. It was difficult to continue to enter the endoscope and a large amount of solid feces in the rectum, which affected the observation A stoma was found in the abdominal wall											Data missing	Data missing	Poor bowel preparation prevented completion.
302	female	Aged 83 in April	1037558		2022-06-29 10:34:00	Never smoked	Never drank alcohol	no	have	5.68	1.22	4.1	have	no	no	5.9	157	73		II	Never used before.	Follow-up for history of colon cancer/polyps			Colonoscopy (painless)	Colonic polyps Cold excision	VIP Exam Room 1	Polyps	Treatment (EMR)	(Ascending colon) Tubular adenoma, low-grade For (ascending colon) tubular adenoma, low grade focal glands are densely arranged. Close follow-up is recommended (Descending colon) chronic polypoid intestinal mucositis	Entry time: 4BBPS: LC:3+TC:3+RC:3= 9 The ileocecal flap was lip-shaped, the opening of the appendix was clear, and no erosion and ulceration or new growth were observed. One polyp of Yamada type I, about 0.4cm in size, with smooth surface mucosa was found in the ascending colon, and another polyp of Yamada type I, about 0.4cm in size, with smooth surface mucosa was found in the ascending colon. A…	l	Tubular adenoma	l	Tubular adenoma							4	9	yes
303	female	May, 83	1117632		2022-07-05 11:32:00	Never smoked	Never drank alcohol	no	have	5.37	0.72	1.7	have	have	no		152	35		III	Currently taking	hematochezia	No complications		Colonoscopy (painless)	Anal cancer, possibly malignant Anal fistula is not excluded	Endoscopy room 1	Rectal cancer	Examination	Moderately differentiated adenocarcinoma was observed	Lens entry time: 7BBPS: LC:2+TC:3+RC:3= 8 The ileocecal valve was lip-shaped, the opening of the appendix was clear, and no erosion, ulcer or neoplasm was observed. The colon mucosa was smooth, the vascular texture was clear, the semilunar fold was intact, no erosion, ulcer or neoplasm was observed. A ring of 3/4 circumferential mass was observed in the anorectal canal, about 4cm from the anal ve…	Rectum	Adenocarcinoma									7	8	yes
304	female	83 in August	1159492		2024-04-29 14:32:00	Never smoked	Never drank alcohol	no	no				no	no	no		158	38		III	Never used before.	Abdominal pain or distension	No complications	Survival	Colonoscopy (painless)	No abnormalities were found in the whole colonic mucosa	Endoscopy Room 4	No abnormalities seen	Examination	no	Into the mirror of time: 5 BBPS: LC: 2 + TC: 3 + RC: 2 = 7 Hook rafa follow cavity into the mirror to the terminal ileum, into the mirror is difficult, about 20 cm, enter the small intestine can see small intestinal mucosa is smooth, no erosion, ulcer, narrow, scar returned to the blind is lip, appendix openings clear, did not see new creatures see colonic mucosa debaucjed ulcer and smooth, vascu…											5	7	yes
305	female	83 in August	1152628		2024-01-24 08:47:00	Smoking now	Never drank alcohol	no		5.56	1.47	3.46	have	no	no		158	88			Never used before.	Abdominal pain or distension	No complications	Survival	Colonoscopy (general)	Rectal narrow nature backlog gynecological cancer metastasis	Endoscopy Room 4	Metastatic carcinoma (rectum) of gynecologic origin	Examination	The squamous epithelium is covered with mucosa, submucosal mucous glands are seen, the glands are dilated, and the cells are mildly atypical. Combined with immunohistochemical results, it is likely to be a mucinous tumor nodule of female reproductive system origin. Please combine clinical and medical history Immunohistochemical results: PAX-8 (+), CK20 (-), CK7 (+), SATB2 (-), P53 (1+), Ki-67 (ab…	A white scar with smooth surface and hard texture was seen in 2/3 of the ring of the stenosis about 10cm into the endoscope, and the colonoscopy could not pass through after repeated attempts. A raised lesion with smooth mucosal surface and dilated blood vessels was seen at 12 o 'dot. Six deep biopsies were made at this site, with tough texture and no active bleeding. No erosion, ulcer or neoplas…	Rectum	Gynecological metastatic malignant mucinous tumor									Failure	Data missing	Intestinal obstruction
306	female	83 in August		101677055	2023-01-10 14:29:00				have	6.97	0.78	4.26	have	no	no		165	60		III	Never used before.	loss of weight			Colonoscopy (painless)	Multiple colonic polyps Ascending colon LST(G-M)	Endoscopy room 5	Colonic polyps	Examination	no	Lens entry time: 8BBPS: LC:2+TC:2+RC:2=6 Two IS-type polyps, about 0.5cm and 1.2cm in size, with surface lobe and color alike, were found on the opposite side of the ileocecal flap of the ascending colon. One IS-type polyp, about 0.5cm in size, surface lobe and color alike, was found behind the second fold above the ileocecal flap of the ascending colon. There was a 1.5x2.0cm LST on the same side…	There were 3 polyps in the ascending colon, the largest of which was 1,5cm										8	6	yes
307	female	Sept., age 83	1014935		2023-03-20 15:32:00	Never smoked	Never drank alcohol	no	have	4.58	1.3	2.79	have	no	no		155	68		II	Never used before.	hematochezia			Colonoscopy (painless)	Multiple colorectal polyps to be removed Melanosis coli Poor bowel preparation	Endoscopy room 6	Rectal cancer, colonic polyps	Examination	(Rectum) a few fragmented tubular adenoma tissue, focal cell atypia is more obvious, promoting fibrosis, considering canceration	Insertion time: 6BBPS: LC:1+TC:1+RC:1=3 There was a large amount of solid feces and fecal water in the intestinal cavity, which covered the mucosa. The ileocecal valve was lip-shaped, and the appendix was clear. There were more than 40 polyps from cecum to rectum. The largest one was located in the rectum, Isp type, about 0.4-1.2 cm, with a surface lobe, local redness and redness, and the observa…	More than 40 polyps were found		Rectum	Adenocarcinoma							6	3	yes
308	male	84	1108248		2022-01-19 14:20:00	Never smoked	Never drank alcohol	no	have	3.66	1.11	2.1	have	no	no		173	80		III	Used intermittently	Positive fecal occult blood	No complications		Colonoscopy (painless)	Colon cancer Malignant possible, pending pathology Multiple polyposis carcinoma of the colon Poor bowel cleansing	Endoscopy Room 2		Examination	A small amount of scattered metaplastic tubular adenocarcinoma tissue is found in the inflammatory necrotic exudative tissue. Please combine clinical and endoscopic findings to make a diagnosis	Entry time: 6BBPS: LC:2+TC:2+RC:2= 6 The ileocecal flap was lip-shaped, the opening of the appendix was clear, no erosion and ulcer and new growth were observed. At 90cm after the transverse colon was retracted, a ring 2/3 circumferential mass was found, with a huge ulcer on the surface, covered with yellow dirt, which was not easy to flush out, with a clear edge, and the surrounding mucosal ring…	cross	Adenocarcinoma									6	6	yes
309	male	84	1104860		2021-11-02 11:06:00	Never smoked	Never drank alcohol	no	no	3.06	0.69	1.79	have	no	no		166	62.5			Never used before.	Change in bowel habits	No complications	Survival	Colonoscopy (general)	Multiple polyps in colon Endoscopic colon polyp suction snare resection with forceps	Endoscopy room 1		Examination	Hyperplastic polyp (ascending colon) (rectal) tubular adenoma, low grade	Clean and lubricated intestinal tract, electronic colonoscopy with a transparent cap on the front end, inserted into the scope from the anus time: 1 Intestinal cleanliness grade 1 The ileocecal valve was lip-shaped, the opening of the appendix was clear, and there was no erosion and ulceration or neoplasm. A polypoid bulge, 0.4*0.4cm in size, with smooth surface and slightly red color, was found …	Ascending colon	Hyperplastic polyps	Rectum 1cm	Tubular adenoma							1	1	yes
310	female	84	1080416		2020-05-26 09:40:00	Smoking now	Never drank alcohol	no	have	4.55	1.87	2.38	have	no	no	6.3	150	65		II	Currently taking	Change in bowel habits			Colonoscopy (painless)	Multiple polyps in the colon, and 8 were removed by forceps (Remaining polyps to be resected) Ascending colon LST Melanosis of the colon	Endoscopy room 3		Examination	(Ascending colon) tubular adenoma, low grade (transverse colon) hyperplastic polyp (Descending colon) chronic inflammation of the polypoid colon mucosa, melanosis (sigmoid colon) tubular adenoma, low-grade, melanosis	Entry time: 7 Bowel cleanliness grade 3-4 There was no obvious abnormality in the terminal ileum. The ileocecal valve was lip-shaped, and the opening of the appendix was clear. There was no erosion and ulceration or new growth. A 1.2×1.4cm LST was found in the ascending colon near the hepatic flexure. FICE was close to the surface of the glandular duct, showing IIIl type, and required electrotomy…	2 liters	Tubular adenoma	L 1.4cm		cross	Hyperplastic polyps	Sigmoid colon	Tubular adenoma			7	4	yes
311	male	84	1066504		2019-08-13 16:22:00	Has quit smoking	Has stopped drinking	no	have	3.11	0.55	1.75	no	have	have	6.1	180	72		II	Currently taking	Positive fecal occult blood			Colonoscopy (painless)	Multiple polyps of the colon Seven polyps were clipped and 3 polyps were removed by electronic endoscopic colonic polyp suction snare	Endoscopy room 3		Treatment (EMR)	(Ascending colon) chronic polypoid mucositis (Ascending colon) tubular adenoma, low grade (transverse colon) tubular adenoma, low grade (transverse colon) tubular adenoma, low grade (transverse colon) tubular adenoma, low grade (Descending colon) tubular adenoma, low grade (Descending B junction) tubular adenoma, low-grade (Sigmoid) tubular adenoma, low-grade (Sigmoid) tubular adenoma, low-grade …	The transparent cap was added on the front end of the electronic colonoscopy, and the scope was inserted from the anus. Time: 4 anal digital examination was negative. Intestinal cleanliness was grade 3 The endoscope was inserted through the cavity to the end of the ileum by the hook pull method, and no obvious abnormalities were found in the end of the ileum. Two IS-type polyps were found in the …	8	Tubular adenoma	Sigmoid colon	Adenocarcinoma							4	3	yes
312	male	84	1065206		2019-08-02 14:58:00	Smoking now	Are drinking alcohol	no	no	2.75	0.45	1.29	have	no	no		172	62		III	Never used before.	Positive fecal occult blood			Colonoscopy (general)	The ileocecal valve mucous membrane was rough Colonic polyps, forceps removed Rectal protuberant ulcerative lesion, carcinoma? Anal papilla melanin pigmentation, nature to be determined Poor bowel preparation	Endoscopy room 5		Examination	There was chronic inflammatory cell infiltration in the intestinal mucosa (ileocecal valve) without specific changes Tubular adenoma (sigmoid colon), low grade (rectal) tubular adenocarcinoma, intermediate	Time to enter the endoscope: 5. Intestinal cleanliness grade 4 A large amount of solid feces and air bubbles were successfully entered into the intestinal cavity, which covered the mucosa and affected the observation of the terminal ileum There was no obvious abnormality in the ileocecal valve, which was lip-shaped, locally slightly rough and red, biopsy *1, the tissue was soft and elastic, and t…	Sigmoid colon	Tubular adenoma	Rectum	Adenocarcinoma							5	4	yes
313	female	84	1036357		2020-05-18 14:53:00	Never smoked	Never drank alcohol	no	no	4.85	2.87	0.99	no	no	no	6.2	155	50		II	Never used before.	hematochezia			Colonoscopy (painless)	Rectal cancer - high possibility of malignancy Colonic polyps	Endoscopy Room 4	(Rectal) tubular adenocarcinoma, low to medium grade	Examination	(Rectal) tubular adenocarcinoma, low to medium grade	Time of entry: 18 intestinal cleanliness grade 4, local grade 5 The ileocecal flap was lip-shaped, the opening of the appendix was clear, and no erosion, ulcer or neoplasm was observed. A polyp with a diameter of 0.6cm, smooth surface and slightly red, was found 30cm below the B junction, and a circumferential mass was found 12 to 18cm in the rectum because of persistent intestinal spasm. The sur…	Rectum	Adenocarcinoma	Descending B junction								18	5	yes
314	male	84	1035971		2018-03-20 14:32:00	Never smoked	Never drank alcohol	no	no	3.49	0.75	2.08	no	no	no		170	58			Never used before.	Abdominal pain or distension			Colonoscopy (general)	Multiple polyps in colon, basically clamp clean	Endoscopy room 5		Examination	1 (straight-B junction) consistent with sessile serrated adenoma 2 (rectum) sessile serrated polyp 3 (rectum) consistent with sessile serrated adenoma	Entry time: 5 Intestinal cleansing Degree 2 Multiple Is and Isp polyps, 0.4*0.5cm-0.6*0.7cm in size, with smooth surface and type II orifice of the glandular duct, were observed. The small polyps were clamps, and the large ones were resected cold with snare. The specimen was sent to the pathology, and a small amount of bleeding was found in the wound. After spraying with thrombin saline, no obvio…	Rectum	Sessile serrated lesions were seen	Rectum	Sessile serrated lesions were seen	Rectum	Sessile serrated lesions were seen					5	2	yes
315	female	84	1032874		2018-01-23 15:23:00	Never smoked	Never drank alcohol	no	no	4.46	0.73	2.24	have	have	no	5.6	156	75		II	Used intermittently	Follow-up for history of colon cancer/polyps			Colonoscopy (painless)	After operation, the colon was tortuous Ascending colon polyp, forceps clean	Endoscopy room 8		Examination	(Ascending colon) tubular adenoma, low grade	Lens entry time: 4 Intestinal cleanliness 1 Grade The ileocecal flap was lip-shaped, the appendix opening was clear, no erosion and ulcer and new growth were observed. An Is type polyp was seen in the ascending colon, 0.3*0.4cm in size, with smooth surface and the color was the same as the surrounding. The biopsy forceps were clean, and the specimen was transferred to the pathology. The transvers…	l	Tubular adenoma									4	1	yes
316	male	84	1021387		2019-07-18 11:15:00	Has quit smoking	Has stopped drinking	no	no	2.88	0.72	1.39	have	have	have	6.6	165	84			Currently taking	Abdominal pain or distension			Colonoscopy (general)	Multiple polyps in colon, to be transurethral resection	Endoscopy room 5		Examination	(hepatic flexure) tubular adenoma, low grade (transverse colon) tubular adenoma, low grade	Entry time: 9 Intestinal cleanliness 3 Grade A 0.6cm diverticulum opening was found in the ascending colon. Fecal retention was found in the diverticulum, and a 0.8*0.9cmIs polyp with central depression and white moss was found in the hepatic flexure. A biopsy piece was obtained. The surface mucosa was smooth and the color was similar to that of the surrounding colon No obvious abnormalities were…	Hepatic flexure	Tubular adenoma	Transverse colon	Tubular adenoma							9	3	yes
317	male	84	1016606		2020-05-26 14:52:00	Never smoked	Never drank alcohol	no	no	3.48	0.63	2.26	no	no	no		170	50		II	Never used before.	anemia			Colonoscopy (painless)	No abnormalities were found in the colonic mucosa	Painless preparation room		Examination	no	There was a large amount of feces in the intestinal cavity, which seriously affected the entry and observation. When the endoscope was returned, the mucosa of the transverse colon, descending colon, sigmoid colon and rectum was smooth, the vascular texture was clear, and the plica of semilunaris was intact. There was no erosion, ulcer or neoplasm in the rectum, anal opening and dentate line											Failure	5	Poor bowel preparation prevented completion.
318	male	84	1009916		2017-01-13 11:54:00	Has quit smoking	Are drinking alcohol	no	have	3.13	1.59	1.45	have	no	have	5.5	173	83			Used intermittently	Follow-up for history of colon cancer/polyps			Colonoscopy (general)	Multiple polyps of the colon EMR operation Internal hemorrhoids	Endoscopy room 8		Treatment (EMR)	1. (Ascending colon) Tubular adenoma, low grade 2. (Transverse colon near hepatic flexure) tubular adenoma, low grade 3. (Transverse colon) tubular adenoma, low grade 4. (transverse colon) tubular adenoma, low grade (transverse colon) tubular adenoma, tended to be high-grade. Immunohistochemical markers were Ki-67,P53,MLH1, MSH2, MSH6, PMS2, and HE (Transverse colon) tubular adenoma, low grade 7.…	Entry time: 10 Intestinal cleanliness grade 3 The opening of the appendix was clear. One Yamada type I polyp (0.5cm) was found near the ileocecal flap in the ascending colon, with smooth surface and color similar to the surrounding mucosa. Six Yamada type I polyps (0.5cm to 1.0cm) were found in the transverse colon. One Yamada type I polyp, about 1.2cm in size, with visible leaves and the same co…	cross	Tubular adenoma, high grade intraepithelial neoplasia	l	Tubular adenoma	4 in transverse colon	Tubular adenoma	Straight B junction	Serrated adenoma	Descending, straight-B junction	Tubular adenoma	10	3	yes
319	male	84		2409582	2020-10-21 13:26:00	Never smoked		no	have	4.17	1.67	1.97	have	no	no		175	83		II	Never used before.	Follow-up for history of colon cancer/polyps			Colonoscopy (painless)	Colonic polyps Clamp clean	Endoscopy room 1		Examination	Tubular adenoma (transverse colon), low grade	Lens entry time: 4 Intestinal cleanliness level 2 Two ISS-type polyps, about 0.4cmx0.4cm in size, were found in the transverse colon about 60cm from the anus. The surface was smooth, the color was similar to the surrounding, and no erosion was observed	cross	Tubular adenoma	cross	Tubular adenoma							4	2	yes
320	male	84		1369796	2020-08-17 12:33:00	Has quit smoking	Are drinking alcohol	no	have	3.65	1.74	1.79	have	no	no		168	80		III		Abdominal pain or distension			Colonoscopy (painless)	Colonic polyposis - Clamp clean	Endoscopy Room 4		Examination	(Transverse colon) chronic inflammation of the polypoid colonic mucosa	Entry time: 5 Intestinal cleanliness grade 3 There was an IS-type polyp (0.3cm in diameter) near the hepatic flexure of the transverse colon. The surface was smooth and the color was the same as the surrounding. The remaining biopsy forceps showed smooth colonic mucosa, clear vascular texture, intact semilunar fold, and no erosion, ulcer or neoplasm	cross	Chronic mucositis									5	3	yes
321	male	84		100848209	2019-05-27 13:33:00	Never smoked	Never drank alcohol	no	have	5.32	1.23	3.53	have	no	no		178	74			Currently taking	Abdominal pain or distension			Colonoscopy (general)	Multiple polyps in the colon Part of the polyp was removed by forceps and the rest by electrotomy Multiple diverticula of colon Melanosis of colon	Endoscopy room 5		Examination	(ileocecal valve) tubular adenoma, low-grade melanosis (transverse colon) tubular adenoma, low-grade melanosis (transverse colon) tubular adenoma, low-grade melanosis	Entry time: 6 Bowel cleanliness grade 3-4 The ileocecal valve was lip-shaped, the opening of the appendix was clear, and there was no erosion and ulcer or neoplasm. Multiple diverticula were found in the ascending colon, 2 polyps in the cecum and 6 polyps in the transverse colon. The diameter was 0.4-1.5cm. The larger 2 polyps (about 1.5cm in diameter) were located in the transverse node Four sma…	2 caecum	Tubular adenoma	3 transverse ones	Tubular adenoma	Descending colon	Tubular adenoma					6	4	yes
322	female	84		101271934	2018-03-26 15:53:00	Has quit smoking	Never drank alcohol	no	no	4.24	0.87	2.75	have	no	have	7.8	160	60		II	Never used before.	hematochezia			Colonoscopy (general)	Colonic stenotic carcinoma Malignant possible	Endoscopy Room 2		Examination	Tubular adenocarcinoma (descending colon)	Entry time: 2 Bowel cleanliness grade 5 The descending colon was 40cm away from the anus. Due to intestinal stenosis, the endoscope failed to pass through the stenosis, a mass occupied 2/3 of the intestinal lumen, the surface mucous membrane was uneven, and the contact was easy to bleeding. Biopsy of 5 pieces of crispy texture showed a polyp 30cm away from the anus, Ip type, about 1.0cm in size, …	Descending colon	Adenocarcinoma									2	5	Intestinal obstruction
323	male	84		102243731	2016-06-03 10:22:00	Smoking now	Are drinking alcohol	no		4.64	1.37	3.24	no	no	no		166	72		II		Abdominal pain or distension			Colonoscopy (general)	Colon cancer Colon polyps	Endoscopy Room 2		Examination	Biopsy (sigmoid colon) : metaplastic adenocarcinoma	A circumferential mass was found in the sigmoid colon 20cm away from the anus, protruded into the intestinal cavity, and the lesion surface was coated with coating, which touched the qualitative border. The lesion involved the entire circumference of the intestinal cavity, and the intestinal cavity was narrow, and the endoscope could not pass through. Four biopsies were performed, and the tissue …	Sigmoid colon	Adenocarcinoma	Sigmoid colon	Tubular adenoma							Failure	3	Intestinal obstruction
324	male	84		124654637	2020-08-03 10:30:00	Has quit smoking	Never drank alcohol	no					have	no	no		165	58		III	Never used before.	Change in bowel habits			Colonoscopy (painless)	Multiple polyps in the colon One was pinched and the other was to be removed	Endoscopy room 3		Examination	(Rectal) tubular adenoma, low grade	Entry time: 6 Intestinal cleanliness grade 2 A ISP-type polyp, 0.6cmx0.8cm in size, with smooth surface and peripheral color, without erosion was found about 20cm from the rectum to the anus. An ISP-type polyp, 0.3cmx0.5cm in size, with smooth surface and peripheral color, without erosion was found about 4cm from the rectum to the anus. Biopsy forceps showed no obvious abnormalities in the remain…	Rectum	Tubular adenoma	Sigmoid colon 0.8 cm								6	2	yes
325	male	84		102104985	2018-09-13 13:30:00	Never smoked	Never drank alcohol	no	have	4.05	1.3	2.48	have	no	no		166	65			Never used before.	Follow-up for history of colon cancer/polyps			Colonoscopy (general)	Colonic multiple polyps, forceps removal Ascending colon surgery Smooth anastomosis	Endoscopy room 5		Examination	1 (sigmoid colon) chronic inflammation of the polypoid colonic mucosa; 2 (rectum) little chronic inflammation of the colonic mucosa	Entry time: 10 intestinal clearance Degree of cleanliness 2 The ascending colon and small intestinal anastomosis were smoothly seen, and the mucosa of the anastomosis was smooth without erosion, ulcer or neoplasm. There was no Yamada type I polyp with a size of 0.5cm in the sigmoid colon at the orifice of the appendix, and the mucosa on the surface of the polyp was white. The biopsy forceps showe…	Sigmoid colon	Chronic mucositis	Rectum	Chronic mucositis							10	2	yes
326	female	84		2337561	2020-07-21 14:00:00					3.84	0.72	2.42	have	no	no		150	50		III		Abdominal pain or distension			Colonoscopy (painless)	The nature of multiple leukoplakia in the colon remains to be determined Infection? Rectal polyps Forceps net	Endoscopy room 5		Examination	1. (ileocecal valve) large necrotic and inflammatory granulation tissue was sent for examination, and the tissue was squeezed and deformed 2. (Transverse colon) colonic mucosa, the lamina propria was infiltrated by chronic inflammatory cells, few neutrophils and eosinophils, part of the interstitium was loose and edema, and the shape of glands was regular 3. (Rectal) tubular adenoma, low grade	Time of endoscopy entry: 7 Intestinal cleanliness grade 4 intestinal preparation was poor, the observation of partial mucosa was affected The appendix orifice and terminal ileum mucosa were smooth. Multiple patchy white plaques were observed in the ascending colon and transverse colon. They were arranged longitudinally along the intestine, local erosion was observed, and no ulcer was observed. Th…	Rectum	Tubular adenoma									7	4	yes
327	male	84		105203948	2021-04-16 13:34:00				have	4.04	1.16	2.1	no	no	no		169	60		II	Never used before.	Follow-up for history of colon cancer/polyps			Colonoscopy (painless)	No abnormalities were found in the whole colonic mucosa	Endoscopy room 5		Examination	no	Lens entry time: 7 Intestinal cleanliness grade 2 The ileocecal valve was lip-shaped, the opening of the appendix was clear, and no erosion or ulcer or neoplasm was observed. The colonic mucosa was smooth, the vascular texture was clear, and the plica of semilunaris was intact, and no erosion, ulcer or neoplasm was observed											7	2	yes
328	male	84		101590039	2020-06-19 11:47:00				have	3.38	0.77	2.04	no	have	no		170	82.5		II	Currently taking	Abdominal pain or distension			Colonoscopy (painless)	after right hemicolectomy Multiple polyps in the colon, to be removed	Painless preparation room		Examination	no	Entry time: 3 Intestinal cleanliness grade 2 20cm from the anus, there was an Ip type polyp, slightly lobed, the surface mucosa was slightly red, and the opening of IIIl gland tube could be seen. Two Isp type polyps were found in the rectum, the size was 0.4*0.5, 0.6*0.8cm. The surface was slightly red and smooth. The remaining colonic mucosa was smooth, the vascular texture was clear, and the pl…	Cecum	Chronic mucositis	Descending colon	Tubular adenoma	Sigmoid colon	Tubular adenoma, focally high grade	Rectum	Tubular adenoma			3	2	yes
329	female	84	1161926	2147436	2019-04-26 10:35:00				no				have	no	have			60			Used intermittently	hematochezia			Colonoscopy (general)	For multiple polyps in the colon, 2 were clamped clean and 2 were removed cold	Endoscopy room 1		Examination	Transverse: tubular adenoma, transverse: tubular adenoma. Sigmoid: chronic mucosal inflammation, rectum: chronic mucosal inflammation	Entry time: 6 intestinal cleansing Degree 2 The appendix orifice was not clearly displayed, and there was a lot of solid stool in the cecum, which affected the observation. There was a 0.5cmIs polyp 55cm from the colon to the anus, and a 0.8*1.0cmIp polyp 50cm from the anus. The length of the pedicle was about 0.5cm, the snare was cold excised, and the titanium clip was placed The wound was close…	cross	Tubular adenoma	cross	Tubular adenoma	Sigmoid colon	Chronic mucositis	Rectum	Chronic mucositis			6	2	yes
330	female	84		123606988	2019-04-26 10:15:00	Never smoked	Never drank alcohol	no	have	4.24	4.14	2.13	no	have	have		160	62		III	Currently taking	Abdominal pain or distension			Colonoscopy (general)	Poor bowel cleanliness Melena coli	Endoscopy Room 2		Examination	no	Into the ascending colon near the hepatic flexure, a large number of intestinal lumen There was a large amount of feces in the intestinal cavity. The colon mucosa was smooth and light brown, the vascular texture was not clear, and the plica of semilunaris was intact, without erosion, ulcer or neoplasm											Failure	5	Poor bowel preparation prevented completion.
331	male	84		1349085	2018-08-01 11:45:00	Never smoked	Never drank alcohol	no	have	2.89	1.54	1.44	have	no	no		166	80		II	Used intermittently	Change in bowel habits			Colonoscopy (painless)	No abnormalities were found in the whole colonic mucosa	Painless preparation room		Examination	no	Lens entry time: 20 Intestinal cleanliness level 4 No abnormal ileocecal valve was found in the mucosa of the appendix and cecum. The opening of the appendix was clear, and no erosion or ulcer or new growth was observed. The colonic mucosa was smooth, the vascular texture was clear, and the plica of semilunaris was intact, and no erosion, ulcer or new growth was observed											20	4	yes
332	female	84 years and 18 days		115415451	2023-10-24 10:18:00				have	4.59	1.11	2.88	have	have	have	5.7	159	52		III	Currently taking	Follow-up for history of colon cancer/polyps			Colonoscopy (painless)	Changes after colon surgery Multiple diverticula in the colon	Endoscopy Room 4	Colonic diverticula	Examination	no	Insertion time: 7 BBPS: LC:2+TC:3+RC:3= 8 There was a diverticulum at the blind end of the colon, the size of the opening was about 0.8X1.0cm, and multiple diverticula were seen in the transverse colon, the size of the opening was about 0.3-0.5cm. There was no fecal stone embedded, and the colon mucosa was smooth, the vascular texture was clear, and the plica of semilunaris was intact											7	8	yes
333	male	84 in January	1127818		2024-05-11 18:00:00	Has quit smoking	Never drank alcohol	no	have	4.6	2.74	3.19	no	no	no	6	162	57		III	Currently taking	Follow-up for history of colon cancer/polyps	No complications	Survival	Colonoscopy (painless)	Multiple polyps of colon To be removed Postoperative changes in the colon	Endoscopy Room 4	Colonic polyps	Examination	Blind: tubulovillous adenoma GII, transverse and straight: tubuloadenoma GII; Transverse: tubular serrated adenoma GII, sigmoid: tubular adenoma GII	Entry time: 4BBPS: LC:2+TC:3+RC:2=7 The hook method was used to enter the endoscope through the cavity through the anastomosis to the end of the ileum. The endoscope was successfully placed at the blind end below the anastomosis, and the surface was smooth and red, and the erosion was seen. The sigmoid colon was about 25cm from the anus, showing an Ip type polyp, about 1.5cm in size, 1.5cm in len…	Cecum	Tubulovillous adenoma	Transverse colon	Tubular adenoma	Transverse colon	Tubular serrated adenoma	The sigmoid colon was 1.5cm	Tubular adenoma			4	7	yes
334	male	84 in February	1125423		2022-11-21 14:09:00	Has quit smoking	Are drinking alcohol	no	have	3.31	1.61	1.66	have	no	have		173	70		II	Never used before.	Positive fecal occult blood			Colonoscopy (painless)	Multiple polyps of colon Cold resection (4 CSPS) Colonic diverticulum Telangiectasia in the colon	Endoscopy room 5	Colon polyps, diverticula, telangiectasia	Treatment (EMR)	Tubular adenoma (ascending colon), low grade (transverse colon) sessile serrated polyp	Entry time: 2BBPS: LC:2+TC:3+RC:2=7 Three diverticula and one telangiectasia were found in the ascending colon. The mucosa was smooth without erosion or bleeding. Two ISS-type polyps were found in the ascending colon, with a smooth surface and similar color. The surface was smooth and the color was the same as the surrounding, and no erosion was found in the transverse colon. The above polyps wer…	l	Tubular adenoma	cross	Sessile serrated lesions were seen							2	7	yes
335	female	84 in February	1036387		2022-11-07 16:41:00	Never smoked	Never drank alcohol	no	no	3.33	1.01	2.07	have	have	have		166	58		III	Currently taking				Colonoscopy (painless)	Multiple polyps in colon, forceps removed and cold removed	Endoscopy room 3	Colonic polyps	Treatment	Hepatic flexure: tubular adenoma, sigmoid colon: sessile serrated polyp	Entry time: 4BBPS: LC:2+TC:2+RC:3=7 The ileocecal valve was lip-shaped, the opening of the appendix was clear, and there was no erosion and ulceration or new growth in the hepatic flexure. There was an IS-type polyp, about 0.3*0.3cm in size, smooth surface, and color similar to the surrounding, and the biopsy forceps were clear. One IS polyp, about 0.6 * 0.6 cm in size, with a smooth surface and …	Hepatic flexure	Tubular adenoma	Hepatic flexure	Tubular adenoma							4	7	yes
336	female	84 in March	1121930		2022-09-27 12:01:00	Never smoked	Never drank alcohol	no	no				have	no	no		160	58		II	Never used before.	anemia			Colonoscopy (painless)	Multiple polyps in the colon Cold resection and forceps removal Hemorrhoids Poor bowel preparation	Endoscopy room 5	Polyps	Treatment	Chronic inflammation of the polypoid colonic mucosa (cecum) Chronic polypoid mucositis of the colon (cecum) (hepatic flexure) villous tubular adenoma, low grade	Lens entry time: 3BBPS: LC:1+TC:2+RC:1=4 Two ISP-type polyps, about 0.3 cm and 0.4cm in size, were found in the cecum. The surface was smooth and the color was the same as the surrounding. The biopsy forceps was removed, and one ISP-type polyp, about 0.8cm in size, was found in the liver flexure. After the wound was closed with tissue clip, the colonic mucosa was smooth, the vascular texture was …	Hepatic flexure	Villous tubular adenoma									3	4	yes
337	male	84 in April	1015419		2023-05-08 11:28:00	Never smoked	Never drank alcohol	no	no	4.49	0.29	2.29	have	no	no	6	160	60		II	Never used before.	hematochezia			Colonoscopy (painless)	Colon polyps Endoscopic suction snare resection	Endoscopy room 5	Colonic polyps	Treatment (EMR)	(Rectal) tubular adenoma, GII	Insertion time: 5 BBPS: LC:3+TC:3+RC:3= 9 The ileocecal valve was lip-shaped, the opening of the appendix was clear, and there was no erosion, ulcer or neoplasm. The colon mucosa was smooth, the vascular texture was clear, and the plica of semilunaris was intact. There was a polyp in the rectum, Isp type, about 0.6cm in size, lobulated, and well raised after saline injection. After the ligation o…	Rectum	Tubular adenoma									5	9	yes
338	female	84 in May	1159424		2024-04-28 15:47:00	Never smoked	Never drank alcohol	no		4.09	2.07	1.98	no	no	no		160	57		IV	Never used before.	Change in bowel habits	No complications	Survival	Colonoscopy (painless)	Colon polyps Multiple, rectal cancer	Endoscopy room 1	Colonic polyps	Examination	Large rectal polyp: tubular adenoma, low grade, central focal intramucosal tubular adenocarcinoma, moderately differentiated, budding grade 1, no neurovascular invasion. Small rectal polyps: tubular adenoma of low grade.	Endoscopic time: 4 BBPS: LC:3+TC:3+RC:3= 9 The ileocecal flap was lip-shaped and the opening of the appendix was clear without erosion or ulceration or neoplasm. A polyp was found 40cm from the descending colon to the anus, which was Yamada type I, about 0.5cm in size, and the surface mucosa was smooth. A polyp was found about 6cm from the rectum to the anus, type Is, about 4 × 3cm in size, with …	Descending colon was 40cn0.5cm		Rectum 1 0.8cm	Adenoma	Rectum 2 4 by 3cm	Adenocarcinoma					4	9	yes
339	female	84 in May	1012773		2023-07-11 13:43:00	Never smoked	Never drank alcohol	no	have	2.94	1.24	1.66	have	no	have	7.2	160	60		II	Used intermittently	Abdominal pain or distension			Colonoscopy (painless)	Colonic polyps Clamp clean	Endoscopy Room 2	Colonic polyps	Examination	Tubular adenoma (transverse colon), GI	Entry time: 4BBPS: LC:2+TC:3+RC:3= 8 The endoscope was inserted through the cavity to the end of the ileum by hook method. A 0.4cmx0.4cm polyp was found in the transverse colon about 50cm from the anus. The surface was smooth and the color was similar to the surrounding without erosion	Transverse colon	Tubular adenoma									4	8	yes
340	female	84 in May		117248309	2022-05-31 10:07:00								no	no	no		155	55		III	Never used before.	Abdominal pain or distension			Colonoscopy (painless)	No abnormalities were found in the whole colonic mucosa	Endoscopy Room 2	No abnormalities seen	Examination	no	Lens entry time: 4 BBPS: LC:2+TC:2+RC:2= 6 The endoscope was inserted 75cm through the lumen to the end of the ileum. The ileocecal valve was lip-shaped, the opening of the appendix was clear, and no erosion or ulcer or neoplasm was observed											4	6	yes
341	female	84 in July	1134340		2023-05-15 11:35:00	Never smoked	Never drank alcohol	no	have	5.08	0.94	2.75	no	no	no	5.9	146	50		II	Never used before.	Abdominal pain or distension			Colonoscopy (painless)	Appendix ostium polyp Colonic polyps, resected by endoscopic suction snare Colonic diverticula were common	Endoscopy room 5	Colonic polyps, diverticula	Treatment (EMR)	Tubular adenoma (sigmoid colon), G II	Insertion time: 5BBPS: LC:3+TC:3+RC:3= 9 The ileocecal valve was lip-shaped, the appendix opening was clear, and a long pedunculated polypoid bulge was seen, about 0.5cm in size and 3cm in length. BLI observation showed a JNETA type sigmoid colon polyp 20cm from the anus, Yamada type II polyp, about 0.8cm in size, red, and the surface mucosa was lobulated. The specimens were broken into 4 pieces …	0.8 for sigmoid colon	Tubular adenoma									5	9	yes
342	male	84 in August	1138292		2023-07-11 14:51:00	Never smoked	Never drank alcohol	no		4.39	1.92	2.55	have	have	no		165	71		III	Currently taking	Change in bowel habits	No complications	Survival	Colonoscopy (painless)	Colon polyps Cold resection (3 pieces of CSP) Internal hemorrhoids	Endoscopy Room 2	Colonic polyps	Treatment (EMR)	(Ascending colon, hepatic flexure) tubular adenoma, GI (Sigmoid colon) tubular adenoma, GII	Insertion time: 6BBPS: LC:2+TC:3+RC:3= 8 One Is polyp was found in the ascending colon and hepatic flexure. The size was about 0.3cm, the surface was smooth, the color was the same as the surrounding, and there was no erosion. After the snare ligation, the patient was removed cold, and there was no active bleeding and no residue on the wound. The specimen was removed by cold resection, and the su…	The ascending colon was 0.3cm	Tubular adenoma	The hepatic flexure is 0.3cm	Tubular adenoma	Sigmoid colon 0.8 cm	Tubular adenoma					6	8	yes
343	male	84 in August	1076123		2023-08-31 12:06:00	Never smoked	Are drinking alcohol	no	have	3.09	1.71	2.3	have	have	no	7.2	170	86			Currently taking	Abdominal pain or distension	No complications	Survival	Colonoscopy (general)	Colonic stricture of undetermined nature Malignant tumor? External pressure? Multiple polyps in the colon	Endoscopy room 6	Colon cancer, colon polyps	Examination	Transverse: chronic inflammation of the mucosa of the large intestine, phagocytic pigmentation of the lamina propria tissue cells, poor general condition, unable to tolerate surgery, automatic discharge without final pathological results.	The biopsy was tough and elastic. There were several Is type polyps scattered from the transverse colon to the descending colon, with a size of 0.2-0.3cm. The surface was smooth and the color was similar to the surrounding. The plica of semilunar was intact, without erosion, ulcer and neoplasm	A mass in the transverse colon	Malignancy may be large without pathology									Failure	Data missing	Intestinal obstruction
344	female	84 in August	1056302		2023-11-22 13:53:00	Never smoked	Never drank alcohol	no	have	3.81	1.46	1.67	have	have	no	6.2	166	66		III	Used intermittently	Positive fecal occult blood			Colonoscopy (painless)	Colonic polyps Cold snare resection (CSP 1 piece)	Endoscopy room 3	Colonic polyps	Treatment (EMR)	(Ascending colon) tubular adenoma, G I	Entry time: 4BBPS: LC:2+TC:2+RC:2=6 No abnormal ileocecal valve lip-shaped was found in the mucosa of the terminal ileum, and the opening of the appendix was clear. No erosion and ulcer and new growth were observed. An IS-type polyp was observed in the ascending colon, about 0.6×0.4cm in size, with smooth surface and the color was the same as the surrounding. There was no active bleeding or resid…	l	Tubular adenoma									4	6	yes
345	male	At 84, Sept	1136347		2023-06-12 17:08:00	Never smoked	Never drank alcohol	no	have	5.67	1.57	3.94	no	no	no		167	67		III	Never used before.	Positive fecal occult blood	Piercing	Survival	Colonoscopy (painless)	Splenic flexure carcinoma possible Multiple polyps in the colon LST of hepatic flexure Endoscopic colon polyp suction snare resection	Endoscopy room 6	, Colon cancer	Treatment (EMR)	A sessile serrated lesion of the appendix (Ascending colon) focal chronic inflammation of the mucosa of the large intestine (Ascending colon) sessile serrated lesion (hepatic flexure, hepatic flexure) tubular adenoma, GⅠ (Splenic flexural) a small amount of large intestine mucosa, glands showed high grade intraepithelial neoplasia, local interstitial fibrosis, a small amount of atypical gland inf…	Insertion time: 6BBPS: LC:3+TC:2+RC:2= 7 A 0.6cm ISP-type polyp was found at the inner side of the appendix, and a 0.5cm ISP-type polyp was found at the beginning of the ascending colon. Both of the above two polyps were found with a 0.8cm ISP-type polyp in the clear hepatic flexure by biopsy forceps. A 1.8×1.5cm LST with smooth surface and white spots at the base was found in the hepatic flexus …	Ostium of appendix	Sessile serrated lesions were seen	Ascending colon	Sessile serrated lesions were seen	Hepatic flexure	Tubular adenoma	Splenic flexure	Adenocarcinoma	Sigmoid colon	Tubular adenoma	6	7	yes
346	female	85	1107747		2021-12-23 12:24:00	Never smoked	Are drinking alcohol	no	have	2.6	0.78	1.34	have	have	no		160	60		II	Used intermittently	Change in bowel habits	No complications	Survival	Colonoscopy (painless)	Multiple cicatricial scars Ileocecal valve deformation Multiple colonic polyps pending management	Endoscopy room 5		Examination	Prolapsed mucosal polyps	Entry time: 5 Ottawa review: R:2+M:1+R-S:1+ fluid :1= 5 The opening of the appendix was clear, the ileocecal valve was deformed, and the endoscope could pass through. Multiple white scars and mucosa were found in the cecum, and the mucosa was convergent. At 20cm from the anus to the cecum, the sigmoid colon was deformed, and an Ip polyp was found. One Is polyp (0.5 cm) and Isp polyp (1.0cm) were …	There were 3 polyps, the largest one was 1,6cm										5	Ottawa 5	yes
347	male	85	1107617		2021-12-21 10:08:00	Never smoked	Never drank alcohol	no	have	4.91	1.44	3 ploidy	no	no	have	10.7	162	49		II	Never used before.	Change in bowel habits			Colonoscopy (painless)	Multiple stenotic carcinoma of the rectum Malignant possibility	Endoscopy room 1		Examination	cancer	Two masses were found 9-15cm from the anal verge, type Ip on the anal side, thick pedicle, head lobe, 2.5*1.5cm in size, fullment, IIIl and IV duct openings, irregular apical duct openings, > 0.6cm in size, soft biopsy, circumferential nodular protuberous mass on the anal side, narrow lumen, and endoscopy failed to pass through. The mucosa on the surface of the tumor was congested, rough, erosive…	Rectum	Adenocarcinoma									Failure	Data missing	Intestinal obstruction
348	male	85	1099386		2021-07-19 14:29:00	Never smoked	Are drinking alcohol	no		4.08	3.2	1.69	have	no	have	8.5	160	60		III	Never used before.	Abdominal pain or distension			Colonoscopy (painless)	Multiple polyps in the colon One was removed cold and the rest were resected by transurethral resection	Endoscopy room 5		Examination	Tubular adenoma	Entry time: 5 Intestinal cleanliness 4 Local observation was not satisfactory. The ileocecal valve was lip-shaped, the opening of the appendix was clear, and there was no erosion and ulceration or new growth. An IS-type polyp was found in the ascending colon. One Is polyp was found at 15cm and 10cm of the rectum. The diameter of the polyp was 0.8cm and 1.0cm, respectively, and the surface was smo…	Rectum 1cm	Tubular adenoma	Rectum	Tubular adenoma							5	4	yes
349	male	85	1084247		2020-09-21 13:24:00	Has quit smoking	Never drank alcohol	no	have	3.96	0.95	2.15	have	have	no	6.2	165	75		III	Used intermittently	Follow-up for history of colon cancer/polyps			Colonoscopy (painless)	Multiple colon polyps Electronic endoscopic colon polyp suction snare resection (EMR 3 pieces)	Endoscopy room 1		Treatment (EMR)	1 (ascending colon) consistent with a mucosal prolapsed polyp 2 (hepatic flexure) consistent with a mucosal prolapsed polyp 3 (transverse colon) consistent with a mucosal prolapsed polyp	Clean and lubricated intestinal tract, electronic colonoscopy with a transparent cap on the front end, inserted from the anus into the scope time: 3 Intestinal cleanliness grade 2 The hook pull method was used to enter the endoscope through the cavity to the ileocecal valve. After entering the endoscope, an ISP-type polyp was found about 70cm from the ascending colon to the anus. The surface was …	Three polyps were found	Prolapsed polyps									3	2	yes
350	male	85	1079373		2020-05-25 15:20:00	Never smoked	Never drank alcohol	no	no	2.65	0.92	1.27	have	no	no	6.1	178	80		III	Currently taking	anemia			Colonoscopy (painless)	Melanosis of the colon	Endoscopy room 5		Examination	no	Entry time: 20 Intestinal cleanliness level 3 The ileocecal valve was lip-shaped, the opening of the appendix was clear, and no erosion or ulcer or neoplasm was observed. The colonic mucosa was smooth and slightly brown, the vascular texture was clear, and the plica of semilunaris was intact, and no erosion, ulcer or neoplasm was observed											20	3	yes
351	male	85	1069799		2019-10-10 16:43:00	Has quit smoking	Never drank alcohol	no	no	3.75	0.96	2.01	no	no	no	5.5	178	65			Never used before.	Follow-up for history of colon cancer/polyps			Colonoscopy (general)	Multiple colon polyps Removal of clamp, cold Colonic polyp suction snare resection via electronic endoscopy	Endoscopy room 5		Treatment (EMR)	L: hyperplastic polyps; Ascending: sessile serrated polyp, Ascending: hyperplastic polyp, hepatic flexure: hyperplastic polyp, hepatic flexure: sessile serrated polyp, sigmoid: hyperplastic polyp, sessile serrated polyp of rectum, rectal: hyperplastic polyp.	The electronic colonoscopy with a transparent cap on the front end was inserted into the scope from the anus. Time: 11 intestinal cleanliness grade 2 There was no abnormal ileocecal valve lip-shaped at the end of the ileum, and the opening of the appendix was clear. There was no erosion and ulceration or neoplasm. There were two IS-type polyps at the beginning of the ascending colon, which were f…	l	Hyperplastic polyps	l	Sessile serrated lesions were seen	Hepatic flexure	Sessile serrated lesions were seen	Rectum	Sessile serrated lesions were seen	Hepatic flexure and sigmoid colon	Hyperplastic polyps	11	2	yes
352	male	85	1041391		2018-06-19 16:17:00	Has quit smoking	Has stopped drinking	no	have				have	no	have		168	55		III	Currently taking	Abdominal pain or distension			Colonoscopy (general)	Colon LST-MIX type Focal type Vi cancer	Endoscopy room 3	Colon cancer, early cancer	Check (enlarge)	(Sigmoid ESD specimen) villous tubular adenoma with high regional grade (12#, 16#, 18#-20#, 22#-26#, 28#, 30#, local intramucosal carcinoma 30#); No tumor embolus in blood vessels and nerve invasion were found. It was close to the bilateral resection margins (26# was high grade) and did not involve the basal resection margin Immunohistochemical results of 20# : D2-40 (-), CD31 (-), CK (+), SMA (-…	A LST-G, was found in the sigmoid colon 25cm from the anus The LST-G was about 4 × 7cm in size with multiple nodules on the surface, the largest nodule was 1.0cm, and the local color was red. BLI magnification showed that the blood vessels were type 2B, and crystal violet staining showed that the local pit was type Vi, and the size was about 1.5mm	The sigmoid colon was 4cm	Villous tubular adenoma, focal advanced edition									Failure	Data missing	Target lesion detected
353	male	85	1041107		2018-06-25 14:59:00	Smoking now	Are drinking alcohol	no	no	3.05	1.1	1.96	have	no	no	6.1	162	61			Never used before.	Positive fecal occult blood			Colonoscopy (general)	Multiple polyps in colon, to be transurethral resection	Endoscopy Room 2		Examination	1 (ascending colon) tubular villous adenoma 2 (ascending colon) tubulovillous adenoma 3 (transverse colon) tubular adenoma, grade 2 4 (transverse colon) tubular adenoma, grade 2 5 (transverse colon) tubular adenoma, low grade 6 (Sigmoid colon) tubular adenoma, focally high grade (superficial), with a clear pedicle 7 (Sigmoid) tubular adenocarcinoma, invasive pedicle, short pedicle, margin (+) pen…	Entry time: 15 Intestinal cleanliness grade 3 Two adjacent 1.0*1.2cmIsp polyps were found in the ascending colon, three 0.6-1.0cmIsp Ip polyps were found in the transverse colon, two adjacent polyps were found in the descending colon, and one polyp was Ip type, 1.2*1.4cm in size and 0.5cm in pedicle length. The adjacent polyp was Isp type, about 1.5*1.5cm in size, with white spots at the root, Ta…	2 liters	Villous tubular adenoma	3 transverse ones	Tubular adenoma	Sigmoid colon	Focal high grade	Sigmoid colon	Adenocarcinoma			15	3	yes
354	male	85	1028607		2017-11-01 11:40:00	Never smoked	Never drank alcohol	no	no				have	no	no		167	62			Never used before.	Change in bowel habits			Colonoscopy (general)	No abnormalities were found in the whole colonic mucosa	Endoscopy room 8		Examination	no	Lens entry time: 8 Intestinal cleanliness grade 2 The endoscope was inserted 85cm through the lumen to the end of the ileum. The ileocecal valve was lip-shaped, the opening of the appendix was clear, and no erosion or ulcer or neoplasm was observed											8	2	yes
355	female	85	1018045		2017-12-04 17:48:00	Never smoked	Never drank alcohol	no	no	3.51	2.18	1.74	have	no	no		150	52			Never used before.	anemia			Colonoscopy (general)	Multiple colon polyps Electroresection (EMR)	Endoscopy room 7		Examination	1 (transverse colon) tubular adenoma, low-grade 2 (descending colon) inflammatory polyp (juvenile type)	Entry time: 10 intestinal clearance Degree of cleanliness 2 There was no abnormality at the end of the ileum. There was a ISP-type polyp 55cm from the transverse colon to the anus, the size of 1.0cmx1.0cm, the surface lobe, and the color was similar to the surrounding. There was no erosion. The color was red, and the erosion was visible. The root of the two polyps above was injected After the les…	The transverse colon was 1cm	Tubular adenoma	Descending colon	Juvenile polyps							10	2	yes
356	male	85	1012948		2016-10-25 12:12:00	Has quit smoking	Has stopped drinking	no	have	6.22	1.69	4.05	have	have	no		165	65			Never used before.	Abdominal pain or distension			Colonoscopy (general)	Colon polyps Clamp clean	Endoscopy room 1		Examination	Tubular adenoma (sigmoid colon), low grade to recommend immunohistochemical labeling Additional pathological diagnosis: Tubular adenoma (sigmoid colon), low grade Immunohistochemical staining showed Ki-67 (10%+), P53 (-), MLH1 (+), MSH2 (+), MSH6 (+), PMS2 (+) --------------------------------------------------------------------------------	Lens entry time: 7 Intestinal cleanliness grade 3 A polyp of Yamada type I, 0.5cm in size, was found 30cm from the anus. The colonic mucosa was smooth, the vascular texture was clear, and the plica semilunaris was intact	Sigmoid colon	Tubular adenoma									7	3	yes
357	male	85	1007932		2017-10-20 15:30:00	Has quit smoking	Are drinking alcohol	no	have	3.69	1.04	2.1	have	no	have	6.8	176	72			Currently taking	anemia			Colonoscopy (general)	Multiple shallow ulcers in the descending colon - Infection? Multiple polyps in the colon Cold excision and EMR3	Endoscopy room 8		Examination	1 (ascending colon) polypoid chronic inflammation of the colonic mucosa; 2 (descending colon 1) Tubular adenoma, low grade; 3 (descending colon 2) colonic mucosa, the lamina propria was infiltrated by lymphocytes and plasma cells, and the glands were regular in shape. 4 (sigmoid colon) chronic inflammation of the polypoid colon mucosa with local necrosis and ulcer	Entry time: 20 intestinal cleanliness grade 2 The ileocecal valve was lip-shaped, the appendix opening was clear, and no erosion and ulceration or neoplasm were found. One polyp was found in the ascending colon near the hepatic flexure, one polyp was found in the descending colon, and one polyp was found in the sigmoid colon. Multiple shallow ulcers with a diameter of 0.2-0.4cm were observed in t…	drop	Tubular adenoma	l	Chronic mucositis							20	2	yes
358	female	85	1006350		2019-05-08 15:38:00	Never smoked	Never drank alcohol	no	have	2.47	1.23	0.99	have	have	no		155	50		III	Currently taking	hematochezia			Colonoscopy (general)	Patchy erythema of the transverse colon Bleeding from the broken ends of rectal vessels Endoscopic hemostasis was performed	Endoscopy room 1		Treatment (hemostasis)	no	Emergency bedside endoscopy A large amount of blood and blood clots were found in the rectum, sigmoid colon and descending colon, and no blood was found in the transverse colon. After the endoscope was withdrawn, scattered strips of erythema were found in the transverse colon mucosa, and no erosion or bleeding was found. There was a broken end of a blood vessel about 2 cm from the rectum to the a…											Failure	Data missing	Target lesion detected
359	male	85		107722758	2018-06-05 12:30:00	Never smoked	Never drank alcohol	no	have	3	0.6	1.25	have	have	have	7.1	158	55		III	Used intermittently	Follow-up for history of colon cancer/polyps			Colonoscopy (general)	Transverse colon polyp, cold resection	Endoscopy Room 2		Examination	Tubular adenoma (transverse colon), low grade	Entry time: 10 Intestinal cleanliness grade 1 The ileocecal flap was lip-shaped, the opening of appendix was clear, and there was no erosion and ulcer or new growth. An Is polyp was seen in the transverse colon, with a size of 0.4*0.6cm, and the surface was concave and erosive. The remaining snare was removed cold, the specimen was delivered to pathology, and the wound was closed with titanium cl…	cross	Tubular adenoma									10	1	yes
360	male	85		103815633	2016-04-26 11:25:00	Never smoked	Never drank alcohol	no	no	4.76	0.85	3.2	have	no	no	5.6	172	70		II	Never used before.	Follow-up for history of colon cancer/polyps			Colonoscopy (general)	Colonic polyps, forceps clear Melanosis of colon	Endoscopy Room 2			(Colonic polyp) Low-grade tubular adenoma (grade II), melanosis	Rectal digital examination was negative, bowel cleanliness grade 2 The hook pull method was used to enter the scope 70cm through the cavity to the end of the ileum. The ileocecal valve was lip-shaped and the opening of the appendix was clear A 0.4cm Yamada type I polyp was found in the sigmoid colon 40cm from the anus. The surface of the polyp was smooth and clear The rest of the intestinal mucos…	Sigmoid colon	Tubular adenoma									Data missing	Data missing	yes
361	female	85		115453368	2020-01-17 14:54:00				have	3.68	1.89	1.54	have	no	no		164	65		III	Currently taking	Change in bowel habits			Colonoscopy (general)	Colonic polyps (forceps removed)	Endoscopy room 7	(Ascending colon) tubular adenoma, low grade	Examination	(Ascending colon) tubular adenoma, low grade	Lens entry time: 13 Intestinal cleanliness level 2 The ileocecal flap was lip-shaped, and no erosion or ulceration or neoplasm was observed. A 0.5*0.6cmIs polyp was found in the ascending colon. The surface was smooth and the color was the same as the surrounding	l	Tubular adenoma									#VALUE!	2	yes
362	male	85		115548977	2020-10-30 11:22:00	Never smoked	Never drank alcohol	no	have	4.23	0.96	2.4	have	no	no		170	60		III	Never used before.	Abdominal pain or distension			Colonoscopy (painless)	Straight B junction cancer, The nature of the anal protuberant lesion remains to be determined by pathology Melanosis of colon Poor bowel cleanliness	Endoscopy room 5	Rectal cancer	Examination	(Rectal) tubular adenocarcinoma, metaplastic There was mild hyperplasia of squamous epithelium with erosion, interstitial granulation tissue formation with a large number of neutrophils infiltration	Intestinal cleanliness was grade 4, affecting observation A circumferential mass 12-22cm away from the anus was found, with surface depression and ulcer formation, surface fouling, uneven bottom nodule, unclear boundary, circumferential mucosal ring-like uplift, surface mucosal congestion and edema, stenosis of the ostial side of the lesion, and the endoscope could not pass the biopsy. Six lesion…	Rectum	Adenocarcinoma									Failure	4	Intestinal obstruction
363	male	85		100548066	2017-09-25 14:05:00					1.98	0.76	3.35										Follow-up for history of colon cancer/polyps			Colonoscopy (general)	Rectum Cancer possible Colon polyps	Endoscopy room 10	Colon cancer	Examination	(rectal) adenocarcinoma	Entry time: 5 Intestinal cleanliness grade 4 A polyp of Yamada type II, about 0.5cm in size, with smooth surface mucosa, a polyp of hepatic flexure of colon, Yamada type I, about 0.4cm in size, with smooth surface mucosa, a mass occupying two thirds of the intestinal lumen, with ulcer formation on the surface, was seen 5cm from the rectum to the anus. The surrounding mucosa was uneven and easy to…	Rectum	Adenocarcinoma	The ascending colon was 0.5cm								5	4	技术难度
364	male	85		105024705	2019-01-28 13:59:00	Has quit smoking	Never drank alcohol	no		5.17	1.49	3.23	no	no	no		168	60			Never used before.	Abdominal pain or distension			Colonoscopy (general)	Multiple polyps in colon, cold resection	Endoscopy room 5		Examination	1 (transverse colon 1) Tubular adenoma, low grade; 2 (transverse colon 2) tubular adenoma, low grade; 3 (ascending colon) tubular adenoma, low grade	Entry time: 26 intestinal clearance Cleanliness grade 2 Hook rafa follow cavity into the mirror 100 cm to blind back disc, opening into the mirror, not smooth appendix shows, ascending colon nearly hepatic flexure visible 1 0.5 type cmIs polyp size, transverse colon is two size is about 0.6-0.7 type cmIs polyps, sigmoid colon is apart from the anus, 25 cm visible 1 0.7 type cmIs polyp size, Above…	l	Tubular adenoma	cross	Tubular adenoma	cross	Tubular adenoma					26	2	yes
365	male	85 years and 10 days	1012598		2024-02-22 10:10:00	Never smoked	Never drank alcohol	no	have	3.2	0.94	1.62	have	no	no		162	60		III	Used intermittently	Abdominal pain or distension			Colonoscopy (painless)	Colonic polyps - Clamp net_X000D_ Melanosis of colon	Endoscopy Room 4	Colonic polyps, melanosis	Examination	Ⅱ (sigmoid colon) tubular adenoma, G	Insertion time: 3BBPS: LC:2+TC:3+RC:2=7 No abnormal ileocecal valve was found in the terminal ileum. The opening of the appendix was clear, and no erosion or ulcer or neoplasm was observed. A 0.4cm polyp was found in the sigmoid colon, which was smooth and pincted	Sigmoid colon	Tubular adenoma									3	7	yes
366	female	85 in October	1122374		2022-09-27 14:35:00	Never smoked	Never drank alcohol	no	no	2.3	0.77	0.73	have	no	have		148	60		III	Never used before.	Change in bowel habits	No complications		Colonoscopy (painless)	Multiple diverticula in colon Hemorrhoids	Endoscopy Room 2	Diverticulum	Examination	no	Entry time: 9BBPS: LC:2+TC:2+RC:2= 6 Anal examination revealed hemorrhoids and fresh blood oozing from the anal orifice The ileocecal flap was lip-shaped, the opening of the appendix was clear, and there were several diverticula with a size of 0.6-0.8cm in the ascending colon. The colonic mucosa was smooth, the vascular texture was clear, and the plica of semilunar was intact											9	6	yes
367	female	85 in February	1122291		2022-09-23 12:05:00	Never smoked	Never drank alcohol	no	have	5.16	3.69	2.7	have	no	no		158	67		II	Never used before.	Change in bowel habits	No complications	Survival	Colonoscopy (painless)	Multiple polyps were found in the colon and 7 were removed by forceps	Endoscopy Room 4		Examination	Chronic inflammation of the polypoid colonic mucosa (cecum) (Cecum) consistent with tubular adenoma, low grade (hepatic flexure) polypoid chronic inflammation of the colonic mucosa Tubular adenoma (transverse colon), low grade (transverse colon) chronic inflammation of the polypoid colonic mucosa	Entry time: 5BBPS: LC:2+TC:3+RC:2= 7 A small amount of fecal water in the intestinal cavity affected the observation No abnormal ileocecal valves were lip-shaped, the opening of the appendix was clear, no erosion and ulcer and multiple diverticula were observed in the cecum. The size of the opening was 0.4-0.6cm, the internal mucosa was smooth, no erosion and ulcer and 6 IStype polyps were observ…	Cecum	Tubular adenoma	cross	Tubular adenoma							5	7	yes
368	male	85 in February	1114519		2022-04-29 13:42:00					3.53	1.13	1.88	have	no	no						Never used before.	hematochezia			Colonoscopy (general)	The nature of sigmoid colon stenosis remains to be determined and pathological cancer is expected Rectal surgery The nature of rectal polypoid bulge is pending pathology Rupture of the anal mucosa	Endoscopy Room 2	Colon cancer	Examination	Sigmoid: moderately differentiated adenocarcinoma, rectum: traditional serrated polyp	At 25cm from the anus, the intestinal lumen was narrow, the endoscope could not pass through, the mucosa was concentrated, the central ulcer was seen, the peripheral mucosa was nodular raised, congested, and the blood vessel was circuitous. At 5cm from the anus, the anastomosis was seen, the mucosa was smooth and slightly edematous. At 1.5cm from the anal dentate line, an Isp polypoid raised, 1.4…	Sigmoid colon	Adenocarcinoma	Rectum	Conventional serrated adenoma							Failure	Data missing	Intestinal obstruction
369	male	Aged 85 and March	1127131		2023-01-13 14:14:00	Has quit smoking	Never drank alcohol	no	no	4.18	1.28	2.7	no	no	no		176	77		III	Never used before.	Change in bowel habits	No complications	Survival	Colonoscopy (painless)	Multiple polyps of colon Clamp 1 The rest to be cut by electric	Endoscopy room 1	Colonic polyps	Examination	Sigmoid colon: tubular adenoma, rectum: villous tubular adenoma	Entry time: 3BBPS: LC:2+TC:3+RC:3= 8 The ileocecal valve was lip-shaped, the opening of the appendix was clear, and there was no erosion or ulceration or neoplasm. 43cm from the anus, an IS-type polyp was found in the transverse colon near the splenic flexure, with a size of 0.8*0.8cm covered with mucus and a II-o type glandular opening. A Isp polyp was found at 1.5cm from the rectum to the denta…	Sigmoid colon	Tubular adenoma	Rectum	Villous tubular adenoma	Transverse colon	Sessile serrated lesions were seen					3	8	yes
370	female	Aged 85 and March		113719152	2024-04-10 09:06:00				have	3.9	5.2	1.34	have	no	no		157	65		II	Never used before.	Follow-up for history of colon cancer/polyps			Colonoscopy (painless)	Multiple polyps in the colon CSP1, 2 forceps clear Postoperative rectum	Endoscopy room 3	Colonic polyps	Examination	Hyperplastic polyp (descending colon) (Ascending colon) consistent with hyperplastic polyp (transverse colon) tubular adenoma, GI	Insertion time: 8BBPS: LC:2+TC:2+RC:2=6 The ileocecal valve was lip-shaped and the opening of the appendix was clear without erosion or ulceration or neoplasm. An IS-type polyp (0.5*0.6cm in size) with smooth surface and similar color was found in the descending colon. The root of the polyp was ligated with a snare and the polyp was removed cold. There was one Is polyp in the ascending colon and …	drop	Hyperplastic polyps	l	Hyperplastic polyps	cross	Tubular adenoma					8	6	yes
371	female	Aged 85 in April	1158262		2024-04-22 16:23:00	Never smoked	Never drank alcohol	no		3.59	1.07	2.51	have	no	have	7.2	152	51			Currently taking	hematochezia	No complications	Survival	Colonoscopy (general)	Multiple polyps of colon Electronic endoscopic colon polypectomy with snare (EMR, n = 8) Sigmoid colon mass Cancer possible	Endoscopy Room 4	Colon cancer	Treatment (EMR)	Tubular adenoma (caecum), G II; (Ascending colon) tubular adenoma, G II; (transverse colon 1) Tubular adenoma, G II; (transverse colon 2) Tubular adenoma, G II; (transverse colon 3) Tubular adenoma, G II; (Descending colon 1) Tubular adenoma, G II; (Descending colon 2) Tubular adenoma, G II; (Sigmoid) tubular adenoma, G II; (sigmoid colon) high to medium metaplastic adenocarcinoma. x000d_ Immunoh…	Clean and lubricating intestinal tract, electronic colonoscopy with a transparent cap on the front end, inserted into the scope from the anus time: 3 anal digital examination negative BBPS: LC:2+TC:2+RC:1= 5 A 1*1.2cmIs polyp was found in the cecum, a 1.0cmIsp polyp was found in the ascending colon, 3 0.8-1.5cmIsp polyps were found in the transverse colon, and 2 1.5cmIp polyps were found in the d…	Eight polyps were found	Tubular adenoma	Sigmoid colon	Adenocarcinoma							3	5	yes
372	female	85 years old in May	1115168		2022-05-16 14:42:00	Never smoked	Never drank alcohol	no	no	4.3	1.37	2.38	no	no	no		163	52			Never used before.	Change in bowel habits	No complications		Colonoscopy (general)	Multiple erythematous patches of the colon Infection?	Endoscopy room 1	No abnormalities seen	Examination	1. Chronic inflammation of the mucosa (descending colon), and the colon is generally normal 2. Chronic inflammation of the mucosa (rectum), colon almost normal	Entry time: 11 BBPS: LC:3+TC:2+RC:2= 7 The ileocecal flap was lip-shaped, and the opening of the appendix was covered by feces, which was not clearly displayed. There was no erosion, ulcer or neoplasm at the end of the ileum. The descending colon, sigmoid colon and rectum mucosa were slightly edematous, with scattered congestion and erythema, unclear boundaries and fuzzy vascular network. The res…											11	7	yes
373	female	85 years old in June	1120572		2022-08-24 10:28:00	Never smoked	Never drank alcohol	no	have	5.11	4.94	2.34	have	no	no		152	55		III	Never used before.	Positive fecal occult blood	No complications	Survival	Colonoscopy (painless)	Erosion of the ascending colon	Endoscopy room 1	Colon infection	Examination	(Ascending colon) colonic mucosa, with erosion, chronic inflammatory cell infiltration in the lamina propria, partial activity, focal lymphocyte aggregation, lymphoid follicle formation, a small amount of glandular structure destruction, cryptitis and crypt abscess can be seen. Please combine clinical consideration	Lens entry time: 4BBPS: LC:2+TC:2+RC:2=6 The ileocecal valve was lip-shaped, the opening of the appendix was clear, the ileocecal valve was swollen, the cecum and the starting segment of the ascending colon were seen in sheets, aphtha-like, and white secretion was seen at the top. The mucosa between the erosions was normal											4	6	yes
374	female	85-year-old Aug	1143240		2023-09-18 10:59:00	Never smoked	Never drank alcohol	no		4.05	0.49	2.35	no	no	no	6.4	155	45		III	Used intermittently	Abdominal pain or distension	No complications	Survival	Colonoscopy (painless)	Colon mass Colon cancer possible	Endoscopy Room 2	Colon cancer	Examination	Metaplastic adenocarcinoma (transverse colon)	Entry time: 5BBPS: LC:3+TC:3+RC:3= 9 Due to the narrowing of the intestinal lumen, the endoscope failed to pass through the stenosis of the transverse colon, and the ulcer occupied the whole circumference, was contaminated with moss, and the surrounding mucosa was nodular and uneven, which was easy to bleeding when contacted. Biopsy of 3 crispy rectum showed a polyp, type II, about 0.8cm in size,…	Malignant tumor in the transverse colon	Moderately differentiated adenocarcinoma was observed	0.8cm polyp in rectum								5	9	Intestinal obstruction
375	female	85-year-old Aug		118348577	2022-07-20 11:12:00	Never smoked	Never drank alcohol	no		3.29	1.05	1.89	have	no	no		148	60		III	Never used before.	Change in bowel habits			Colonoscopy (general)	Rectal mass Cancer may be Colonic polyps	Endoscopy room 3	Rectal cancer, colonic polyps	Colonoscopy (general)	Metaplastic tubular adenocarcinoma (rectum)	Insertion time: 10 BBPS: LC:2+TC:2+RC:1= 5 The rectum was 5-12cm from the anus. There was a 2/3 circumferential mass with spontaneous bleeding, cauliflower-like, irregular surface shape, yellow and white moss, clear boundary, uneven surrounding mucosa, narrow lumen, and the endoscope could pass through. The biopsy was poor and crisp. A 0.6 cMISP-type polyp with smooth and white surface mucosa was…	Rectum	Adenocarcinoma	Sigmoid colon 0.6cm								#VALUE!	5	yes
376	male	85-year-old Aug		102797265	2024-05-10 09:25:00	Never smoked	Never drank alcohol	no	no	3.52	0.65	2.21	have	no	no	5.5					Never used before.	Change in bowel habits			Colonoscopy (general)	The narrow nature of Zhigui-B junction uplift is unknown Carcinoma?	Endoscopy room 3	Colon cancer metastasis, pulmonary origin possible	Examination	Adenocarcinoma is considered. Combined with immunohistochemistry, it does not support colorectal cancer. Pulmonary origin cannot be excluded, but the morphology is not typical and NapsinA is negative Immunohistochemical results: : CK7 (+), CK20 (-), SATB2 (-), CDX-2 (-), CD117 (+), GATA-3 (-), TTF-1 (+), NapsinA (-), Ki-67 (about 65%+), P53 (3+), p63 (-), S-100 (-), Tg (-)	Lens entry time: 6BBPS: LC:1+TC:1+RC:1=3 The results are for reference, after explaining to the family members, the colonoscopy examination was completed, the patient's discomfort was obvious, and it was difficult to re-enter the scope when he withdrew, so he could not keep a clear image. The ileocecal valve was found to be a labial-shaped straight B junction with an irregular mucous membrane, ab…	Rectum	Rectal metastasis from lung cancer									6	3	yes
377	male	86	1105820		2021-11-19 16:00:00	Never smoked	Never drank alcohol	no		3.54	0.66	2.18	have	no	no	5.9	168	67		II	Currently taking	hematochezia			Colonoscopy (painless)	Multiple polyps in the colon Two polyps were clipped and the remaining one was resected by electrotomy Ulcerous lesions of sigmoid colon - Combined with history and pathology	Endoscopy room 3		Examination	1. (Hepatic flexure) tubular adenoma, low grade (Descending colon) tubular adenoma, low grade 3. (Sigmoid colon 23cm from anus) chronic active inflammation of the mucosa and inflammatory necrosis were also seen	Entry time: 5 Intestinal cleanliness grade 2 The appendiceal orifice was clearly shown, the ileocecal flap was lip-shaped, a 0.3cmIs polyp was seen in the hepatic flexure, and a 0.4cmIs polyp was seen in the descending colon. Both biopsy forceps were clean. A 1cmIsp polyp was seen 45cm from the anus. There was a 0.6*2.0cm ulcerative lesion located 23cm from the anus. The surrounding mucosa was ra…	Hepatic flexure	Tubular adenoma	Descending colon	Tubular adenoma							5	2	yes
378	male	86	1103672		2021-10-12 15:15:00	Smoking now	Are drinking alcohol	no		4.76	1.52	3.21	have	no	have	7.7	175	78			Never used before.	hematochezia	No complications		Colonoscopy (general)	Multiple erosions and ulcers in the colon to be determined Crohn's disease? UC? Intestinal involvement in RA? Ischemia? Co-infection can be large Multiple polyps in the colon	Endoscopy room 3		Examination	Acute and chronic inflammation of the intestinal mucosa with interstitial edema and deformed crypts (Ascending colon near ileocecal valve) acute and chronic intestinal mucosal inflammation with cryptitis (Transverse colon) acute and chronic inflammation of the intestinal mucosa, deformation of cryptitis, cryptitis and crypt abscess (Descending colon) acute and chronic inflammation of the intestin…	The time of entering the endoscope was 6 months. The intestinal cleanliness was grade 4, and there were more stools in the intestinal cavity, especially in the ascending colon, and the observation was unsatisfactory The ileocecal valve was lip-shaped, the opening of the appendix was not clear, the whole colon mucosa was diffuse hyperemia and edema was obvious, the vascular texture was fuzzy and g…											6	4	yes
379	male	86	1093509		2021-03-30 11:55:00	Never smoked	Never drank alcohol	A first-degree relative over 60 years old was diagnosed with colorectal cancer.	have	3.68	1.76	2	have	no	have	8.2	168	71		II	Never used before.	Change in bowel habits			Colonoscopy (painless)	Multiple colon polyps Two were resected cold and 7 were clamped clean	Endoscopy Room 2		Examination	(Ascending colon) tubular adenoma, low grade, melanosis (Ascending colon) tubular adenoma, low-grade, melanoma (Ascending colon) tubular adenoma, low-grade, melanoma (transverse colon) tubular adenoma, low-grade, melanoma (transverse colon) tubular adenoma, low-grade, melanoma (transverse colon) tubular adenoma, low-grade, melanoma	Lens entry time: 4 Intestinal cleanliness grade 4 The ileocecal valve was lip-shaped and the opening of the appendix was clear. There was no erosion or ulcer and neoplasm. One Is polyp (0.8cm in diameter) was found in the transverse colon near the hepatic flexure, and another Is polyp (0.8cm in diameter) was found in the descending colon near the splenic flexure. Three small polyps (0.2-0.4cm in …	6 polyps	Tubular adenoma									4	4	yes
380	female	86	1081801		2020-07-24 10:39:00	Never smoked	Never drank alcohol	no	have	2.41	0.6	0.95	no	no	no	6	152	50		II	Never used before.	hematochezia			Colonoscopy (painless)	The nature of sigmoid colon carcinoma-combined with pathology Rectal polyps	Endoscopy Room 4		Examination	1. (rectal) tubular adenocarcinoma; 2. (Ascending colon) tubular adenoma, low grade; 3. (hepatic flexure colon) colonic mucosal tissue, a few eosinophils	At 15cm from the anus, 3/4 circumferential mass was found, with irregular surface shape, erosion on the surface, covered with white moss, bleeding on palpation, clear boundary, white spots at the root of the mass, narrow lumen, and the endoscope could not pass through. At 8cm from the anus, a 0.6cmIs polyp with white and smooth surface mucosa was found	Rectum	Adenocarcinoma	l	Tubular adenoma							Failure	Data missing	Intestinal obstruction
381	male	86	1062250		2019-05-24 11:00:00	Smoking now	Never drank alcohol	no	have	5.09	0.8	3.51	no	have	no		176	70			Used intermittently	Positive fecal occult blood			Colonoscopy (general)	Appendix nature to be determined Multiple colon polyps, partial cold resection, forceps removal Part to be resected by electrotomy Melanosis of colon	Endoscopy room 1		Examination	Chronic inflammatory cell infiltration of the intestinal mucosa with loose stroma and regular glands Tubular adenoma (transverse colon), low grade (Sigmoid colon) sessile serrated polyp, melanosis Chronic inflammation of polypoid intestinal mucosa, melanosis	Entry time: 15 intestinal cleanliness grade 4 The ileocecal valve was lip-shaped, the opening of the appendix was enlarged, and the surrounding mucosa was raised. The size of the ileocecal valve was 1.2*1.2cm, the surface was smooth and the texture was tough. Biopsy *1 at the opening showed 2 Isp and Is polyps in the middle segment of the ascending colon. Two ISP and ISPs were found in the middle…	Cecum	Chronic mucositis	cross	Tubular adenoma	Sigmoid colon	Sessile serrated lesions were seen					15	4	yes
382	female	86	1053772		2019-01-10 16:07:00	Never smoked	Never drank alcohol	no	no	4.61	0.85	2.53	no	no	no	5.7	166	50		II	Never used before.	anemia			Colonoscopy (painless)	Knot Intestinal polyps, clamp clean	Endoscopy Room 2		Examination	(Hepatic flexure) tubular adenoma, low grade	Anal examination was negative, and the endoscopy time was 11 intestinal Tract cleanliness was grade 2 There was no abnormal ileocecal valve lip-shaped at the end of the ileum. The opening of the appendix was clear, and there was no erosion or ulcer or neoplasm. There was an IS-type polyp (0.5x0.3cm in size and slightly white) in the hepatic flexure	Hepatic flexure	Tubular adenoma									11	2	yes
383	female	86	1039983		2018-05-25 16:36:00	Never smoked	Never drank alcohol	no	no	4.33	0.56	2.16	no	no	no	6.1	150	50		II	Never used before.	hematochezia			Colonoscopy (general)	The rectus B junction was elevated, and the cancer was located during the operation	Endoscopy room 5		Examination	(Sigmoid bowel) tubulovillous adenocarcinoma, fungating type, size 1.5*1.2*0.2cm, invading the submucosa, without tumor at the margin of the upper and lower bowel and the stump of the mesentery. No tumor in lymph nodes (0/15)	During laparoscopy, enteroscopy was performed and was given An Isp type polypoid bulge (2.0×1.2cm in size, slightly depressed in center) was found 20cm from the anus to the rectosigmoid junction. Assisted laparoscopic localization of the lesion on the opposite side, the endoscope was withdrawn	Sigmoid colon	Adenocarcinoma									Failure	Data missing	Target lesion detected
384	female	86	1032389		2018-01-05 09:09:00	Never smoked	Never drank alcohol	no	have	7.3	1.97	5.04	have	have	have	5.6	160	60			Used intermittently	Change in bowel habits			Colonoscopy (general)	Rectal cancer Melanosis of the colon	Endoscopy room 8		Examination	Tubular adenocarcinoma	Entry time: 7 Intestinal cleansing Degree 3 The ileocecal valve was lip-shaped, the appendix opening was clear, there was no erosion and ulceration and neoplasm. There was a mass 8-12cm from the rectum to the anus, which was nearly circumferential involved, with surface fouling and bleeding easily to touch. The biopsy texture was crisper and the intestinal cavity was slightly narrow. Under endosc…	Rectum	Adenocarcinoma									7	3	yes
385	female	86	1029305		2017-10-25 10:51:00	Never smoked	Never drank alcohol	no	no	4.34	1.03	2.82	have	no	have	7.2	155	60		III	Never used before.	Abdominal pain or distension			Colonoscopy (general)	Colon cancer Colon polyps Forceps	Endoscopy room 8		Examination	1 (Descending sigmoid colon) tubular adenoma, low grade 2 (transverse colon) tubular adenoma, low-grade 3 (transverse colon near hepatic flexure) villous tubular adenoma, locally high grade, please combine clinical	Time to enter the endoscope: 3 Bowel cleanliness grade 2 A mass occupying the whole circumference was found in the transverse colon near the hepatic flexure. The surface of the mass was uneven, ulcer formation could be seen, and easy bleeding was seen in contact with 4 biopsy pieces, which were crissum. A polyp was found in the transverse colon, Yamada type I, about 0.4cm in size. The remaining b…	Descending B junction	Tubular adenoma	Transverse colon	Tubular adenoma	cross	Villous tubular adenoma, focally high-grade					3	2	Intestinal obstruction
386	female	86	1024557		2017-07-31 13:55:00	Never smoked	Never drank alcohol	no	no	4.17	0.89	2.72	no	no	no		152	39		II	Never used before.	Abdominal pain or distension			Colonoscopy (general)	There were more feces in the intestinal cavity, which affected the observation	Endoscopy room 10		Examination	no	Entry time: 5 Intestinal cleanliness grade 5 With the hook-pull method, the lens was inserted 35cm through the lumen to the descending colon. There were many formed feces in the intestinal cavity, and the lens could not be continued for observation											5	5	Poor bowel preparation prevented completion.
387	female	86	1016476		2021-11-17 15:38:00	Never smoked	Never drank alcohol	no	no	4.27	1.98	2.87	have	no	no		160	62		II	Never used before.	hematochezia			Colonoscopy (painless)	Polypoid bulge at the anastomosis Sigmoid colon cancer Malignant possibility Multiple polyps in the colon	Endoscopy Room 2	Colon cancer	Examination	Chronic inflammation of the mucosa (of the anastomosis) (Sigmoid colon) moderate-low grade adenocarcinoma to be diagnosed by immunohistochemistry	Entry time: 4 Intestinal cleanliness grade 2 A polypoid mass about 0.5cm*0.5cm in size with red surface was seen at the anastomotic site. One piece of biopsy was soft and elastic, the ileocecal valve was lip-shaped, the opening of the appendix was clear, and no erosion and ulcer or neoplasm was observed. The anal side was caulifle-like bulge, the surface was dirty and mossy, the edge was nodular,…	Anastomotic stoma	Chronic inflammation	Sigmoid colon	Adenocarcinoma							4	2	yes
388	male	86		103718330	2019-07-31 08:54:00	Has quit smoking	Never drank alcohol	no	no	4.03	1.32	2.65	no	no	no		173	70		II	Never used before.	Abdominal pain or distension			Colonoscopy (general)	Colonic polyps Cold excision	Endoscopy room 5		Treatment (EMR)	Tubular adenoma (transverse colon), low grade (Sigmoid) tubular adenoma, low grade (Sigmoid) tubular adenoma, low-grade	Entry Time: 5 Intestinal cleanliness grade 2 The hook-draw method was used to enter the endoscope through the cavity to the end of the ileum. The ileocecal valve was lip-shaped, the opening of the appendix was clear, and there was no erosion and ulcer and a new transverse colon Polyp, Yamada type I, about 0.4cm in size, smooth surface mucosa, two polyps in sigmoid colon, Yamada type II, about in …	cross	Tubular adenoma	cross	Tubular adenoma	Sigmoid colon	Tubular adenoma					5	2	yes
389	female	86		2150132	2019-10-28 14:12:00	Never smoked	Never drank alcohol			4.92	2.79	2.51	have	no	no		145	55		III	Never used before.	Change in bowel habits			Colonoscopy (painless)	Colon polyps Clamp clean	Endoscopy room 3		Examination	Tubular adenoma (sigmoid colon), low grade	Entry time: 7 Intestinal cleanliness level 2 The ileocecal valve was lip-shaped, the opening of the appendix was clear, and no erosion, ulcer or neoplasm was observed. A polyp of Yamada type I was found in the sigmoid colon, about 0.5cm in size, and the surface mucosa was smooth. Two biopsies were clamp clean, and the remaining colonic mucosa was smooth, the vascular texture was clear, and the pl…	Sigmoid colon	Tubular adenoma									7	2	yes
390	male	86		115329678	2017-06-21 11:09:00					3.29	0.86	1.56	have	no	no							Follow-up for history of colon cancer/polyps			Colonoscopy (general)	Multiple polyps in colon, forceps clear Melanosis of colon	Endoscopy room 8		Examination	1. (Cecum) tubular adenoma, low grade 2. (Transverse colon) tubular adenoma, low-grade, with melanosis	Time of entering the endoscope: 4 Intestinal cleanliness was grade 3, and there was more fecal water in the intestinal cavity, which affected the observation A Yamada type I polyp (0.2*0.3cm in size) with smooth surface and similar color was seen in the cecum. A Yamada type I polyp (0.3*0.3cm in size) with smooth surface was seen at 65cm from the transverse colon to the anus. The color was the sa…	Cecum	Tubular adenoma	Transverse colon	Tubular adenoma							4	3	yes
391	male	86		101588588	2019-11-13 10:00:00								have	no	no		170	75		III	Never used before.	Change in bowel habits			Colonoscopy (painless)	No abnormalities were found in the whole colonic mucosa	Endoscopy Room 2		Examination	no	The intestinal cleanliness was grade 3, and there was a lot of fecal water in the intestinal cavity No abnormal ileocecal valves were lip-shaped, the opening of the appendix was clear, and no erosion or ulcer or neoplasm was observed. The colonic mucosa was smooth, the vascular texture was clear, and the plica of semilunaris was intact, and no erosion, ulcer or neoplasm was observed											3	3	yes
392	female	86 in January	1114982		2022-05-10 11:24:00	Never smoked	Never drank alcohol	no	have				have	no	no		162	53			Never used before.	Follow-up for history of colon cancer/polyps	No complications		Colonoscopy (general)	Multiple polyps in the colon One polyp was removed by forceps and 1 polyp was removed by electronic endoscopic snare Multiple diverticula in sigmoid colon	Endoscopy room 5	Polyps, diverticula	Treatment (EMR)	Tubular adenoma (caecum), low grade (Sigmoid) tubular adenoma, low grade	Insertion time: 20BBPS: LC:3+TC:3+RC:2= 8 There was no obvious abnormality in the terminal ileum. The ileocecal valve was lip-shaped, the opening of the appendix was clear, and there was no erosion and ulceration or neoplasm. A 0.4cm ISP-type polyp was found in the cecum, with smooth surface and the color was similar to the surrounding, and the biopsy was soft. The color was slightly red, epineph…	Cecum	Tubular adenoma	Sigmoid colon	Tubular adenoma							20	8	yes
393	male	86 years and 20 days	1131381		2023-03-31 15:04:00	Never smoked	Never drank alcohol	no		4.81	0.9	3.46	no	no	no		156	53		II	Never used before.	hematochezia			Colonoscopy (painless)	Rectal cancer - consistent with malignancy Multiple colonic polyps (one LST, mixed nodular type) Poor bowel preparation	Endoscopy Room 2	Colonic polyps, rectal cancer	Examination	(Rectum) at least intramucosal cancer (shallow tissue)	Insertion time: 4 BBPS: LC:1+TC:1+RC:1= 3 There was a large amount of liquid and residue in the intestinal cavity. The ileocecal valve was lip-shaped, the opening of the appendix was clear, there was no erosion or ulcer and new growth. A lateral growing polyp with a diameter of 2.0cm and a granular nodular surface with uneven nodule size was found 50cm in the middle of the transverse colon of typ…	Transverse colon 0.8		Transverse colon 2.0		Rectum	Adenocarcinoma					4	3	yes
394	male	86 years and 22 days	1157719		2024-04-10 09:04:00	Never smoked	Never drank alcohol	no	have	3.63	1.06	2.68	have	have	no	6.7	150	54			Used intermittently	Abdominal pain or distension	No complications	Survival	Colonoscopy (general)	Ascending colon mass cancer of undetermined nature Multiple polyps in the colon Melanosis of colon	Endoscopy Room 4	Colon cancer	Examination	High-grade intraepithelial neoplasia (ascending colon), the specimen is superficial, please combine with clinical practice	Entry time: 9BBPS: LC:1+TC:2+RC:1= 4 A mass of Yamada type I, about 2.0cmx3.0cm in size, was found above the ileocecal flap of ascending colon. The surface of the mass was leaf, the color was the same as the surrounding, erosion could be seen, mucus could be seen, bleeding easily after rinsing, the surface structure was not clear, and no area of structure disappearance was found. Another 3 IS-typ…	The ascending colon was 2*3cm	Advanced version of intraepithelial neoplasia	3 polyps in the ascending colon		Five polyps in the sigmoid colon						9	4	yes
395	female	86 in April	1094713		2023-06-06 14:41:00	Never smoked	Never drank alcohol	no	no	3.53	2.08	1.73	have	no	no		156	58		III	Never used before.	anemia	No complications		Colonoscopy (painless)	Colon cancer nature to be determined Multiple scars in the colon Poor bowel preparation	Endoscopy Room 4	Colon cancer pT3N1cMx	Examination	(hepatic flexure of transverse colon) examination showed chronic inflammation of the large intestine mucosa, several atypical acinar structures were found in the focal mucosal muscles, and some cells secreted mucus. Immunophenotyping supported intestinal epithelialization, which could not exclude the infiltration of adenocarcinoma IHC: CK7 (-), CK20 (+), SATB2 (+), MUC1 (+), CK19 (+), SMAD4 (+),H…	Insertion time: 4BBPS: LC:2+TC:1+RC:1=4 A large number of formed feces were found in the intestinal tract, which seriously affected the observation. Circumferential masses could be seen near the hepatic flexure of the transverse colon, which could not be exposed in full view, with irregular surface shape, erosion in the center, filth covered, blood visible, occupying about 2/3 of the intestinal l…	cross	Adenocarcinoma									4	4	yes
396	female	86 years, 5 days		1001915819	2022-06-06 10:03:00	Never smoked	Never drank alcohol	no	have	2.61	1.34	1.27	have	no	no		160	50		III	Currently taking	Abdominal pain or distension			Colonoscopy (general)	The nature of the colon cancer is to be determined Colonic polyps	Endoscopy room 6	Colon cancer, colon polyps	Examination	(transverse colon) consider at least intramucosal cancer (deformed, superficial tissue)	Entry time: 9BBPS: LC:2+TC:3+RC:3=8 The mass was found in the transverse colon with irregular surface shape, ulcer in the center, and filth covering. The boundary was clear, the surrounding mucosa was uneven, occupying about 4/5 of the intestinal lumen. The lumen was narrow, and the endoscope could not pass through. There was no obvious abnormality in the rest of the colon around the same color	cross	Adenocarcinoma	2 transverse	Tubular adenoma							9	8	Intestinal obstruction
397	male	86 in July	1117637		2022-07-11 12:47:00	Has quit smoking	Has stopped drinking	no	have	2.94	1.67	0.83	have	no	have	6.7	173	88		II	Never used before.	Change in bowel habits	No complications	Survival	Colonoscopy (painless)	Multiple polyps in the colon Wait for transurethral resection Multiple diverticula in the colon	Endoscopy room 3	Polyps, diverticula	Examination	Ascending: tubular adenoma; Appendiceal ostium: hyperplastic polyp, transverse: chronic mucosal inflammation. Transverse: tubular adenoma, descending: chronic mucosal inflammation, sigmoid: tubular adenoma	Entry time: 6BBPS: LC:3+TC:2+RC:2= 7 The ileocecal valve was lip-shaped and the opening of the appendix was clear. There was no erosion and ulcer or neoplasm at the end of the ileum. Multiple diverticula were scattered in the whole colon, ranging from 0.2 to 1.0cm in size. On the opposite side of the cecal ileocecal flap, there was a lobulated Isp polyp measuring 1.5*1.2cm, a polyp measuring 0.7c…	Liter 1.2	Tubular adenoma	Ostium of appendix	Hyperplastic polyps	Transverse colon	Tubular adenoma	Sigmoid colon	Tubular adenoma			6	7	yes
398	female	86 in July		101975389	2022-09-09 10:14:00	Never smoked	Never drank alcohol	no	no	4.5	0.78	2.73	have	no	no	5.8	160	57		II	Never used before.	Abdominal pain or distension			Colonoscopy (painless)	Colonic polyp forceps clear	Endoscopy room 1	Polyps	Examination	Tubular adenoma (sigmoid colon), low grade	Lens entry time: 7BBPS: LC:2+TC:3+RC:2= 7 There was no abnormal ileocecal valve lip-shaped at the end of the ileum, and the opening of the appendix was clear. There was no erosion and ulceration or new growth. An IS-type polyp was seen in the sigmoid colon, about 0.3X0.4cm in size, with smooth surface and similar color. No erosion, ulcer or neoplasm was observed	Sigmoid colon	Tubular adenoma									7	7	yes
399	male	86 in August	1111505		2023-06-30 11:00:00	Never smoked	Never drank alcohol	no	have	4.53	0.67	2.81	have	no	no		174	75		III	Never used before.	Positive fecal occult blood			Colonoscopy (painless)	Rectum Cancer possible Colonic polyps, cold removal	Endoscopy room 1	Rectal cancer, colonic polyps	Examination	Transverse: tubular adenoma, rectal: adenocarcinoma	Insertion time: 4BBPS: LC:2+TC:2+RC:3= 7 The ileocecal flap was lip-shaped, the appendix opening was clear, and an IS-type polyp was found in the transverse colon. The size of the polyp was 0.5*0.5cm, the surface was smooth and the color was the same as the surrounding. The snare was removed cold, and there was no residual or active bleeding at the stump. A depressed mass, 2.5*2.5cm in size, with…	cross	Tubular adenoma	Rectum	Adenocarcinoma							4	7	yes
400	female	87	1106840		2021-12-09 12:43:00	Never smoked	Never drank alcohol	no	have	2.9	0.72	2.22	have	have	no	5.2	170	50		III	Currently taking	anemia	Bleeding	Survival	Colonoscopy (general)	Carcinoma of the ileocecal region of undetermined nature Possible malignancy with hemorrhage Endoscopic hemostasis and management Multiple colonic polyps pending treatment Transverse colon LST (G, homogeneous granular type)	Endoscopy room 1		Examination	Moderately or poorly differentiated adenocarcinoma	Entry time: 12 Bowel cleanliness grade 3 Using the hook pulling method, the lens was inserted 85cm through the lumen to the ileocecum, and the lens was not well entered. A raised mass, about 5*5cm in size, occupying 3/5 of the circumferential lumen, was found in the mesangial margin of the ileocecum, with deep depression and ulcer formation in the center, covered with dirty moss, unclear edge, an…	l	Adenocarcinoma									12	3	yes
401	male	87	1088958		2020-12-22 13:21:00	Never smoked	Never drank alcohol	no	have	2.56	1.16	1.11	have	no	no		166	80		II	Never used before.	hematochezia			Colonoscopy (painless)	Sigmoid colon cancer, Rectal cancer, Multiple polyps in the colon	Endoscopy room 3		Examination	Adenocarcinoma (sigmoid colon), tubulovillous (tissue superficial) Adenocarcinoma (rectum), tubulovillous	Entry time: 9 bowel cleanliness grade 4 The ileocecal valve was lip-shaped, the appendix opening was clear, and there was no erosion and ulcer or new growth in the intestinal cavity. More than 10 Is-Isp type polyps were scattered in the cecum and descending colon. The size was about 0.4-1.0cm, and the color was slightly red. After electrocision, a circumferential mass was found 20cm from the sigm…	Sigmoid colon	Adenocarcinoma	Rectum	Adenocarcinoma							9	4	yes
402	female	87	1085088		2020-10-15 15:19:00	Never smoked	Never drank alcohol	no	have	4.65	3.18	2.2	have	no	have	8.4	157	56		II	Never used before.	Change in bowel habits			Colonoscopy (painless)	Cecum slightly rough - inflammatory possible	Endoscopy room 1		Examination	(Cecum) colonic mucosa, small lymphocytic plasma cell infiltration in lamina propria, scattered eosinophils	Entry time: 6 Intestinal cleanliness grade 3 The ileocecal valve was lip-shaped, the opening of the appendix was clear, and no erosion or ulcer or neoplasm was observed. The cecum mucosa was slightly rough, and the colon mucosa was smooth, the vascular texture was clear, and the plica was intact											6	3	yes
403	male	87	1061857		2019-06-11 16:15:00	Never smoked	Never drank alcohol	no	have	3.47	0.73	1.69	no	have	have	6.1	159	56		II	Currently taking	Change in bowel habits			Colonoscopy (painless)	Multiple colon polyps (forceps, cold resection) Multiple diverticula in the ascending colon	Endoscopy room 1	(Ascending colon) tubular adenoma, low grade	Examination	Tubular adenoma (ascending colon), low grade (Ascending colon) tubular adenoma, low grade (Ascending colon) tubular adenoma, low grade (Ascending colon) tubular adenoma, low grade (Descending colon) tubular adenoma, low grade	Entry time: 10 intestinal tract Cleanliness grade 2 hook method was used to enter the endoscope 85cm through the cavity to the end of the ileum. The ileocecal valve was lip-shaped, the opening of the appendix was clear, and there was no erosion and ulceration or neoplasm. Two polyps of 0.2-0.3cmIs in size were found near the ileocecal junction of the ascending colon. Three 0.5-0.7 cMISP-type poly…	5.	Tubular adenoma									#VALUE!	2	yes
404	female	87	1059505		2019-04-26 12:48:00	Has quit smoking	Never drank alcohol	no	have	3.15	1.11	1.96	have	have	have	7.1	155	75		II	Currently taking	Abdominal pain or distension			Colonoscopy (general)	Cecum Mass, carcinoma? Multiple polyps in sigmoid colon, local malignant change to be excluded	Endoscopy Room 4		Examination	Tubular adenocarcinoma	Entry time: 20 bowel Tract cleanliness grade 3-4 There was a raised mass next to the ileocecal valve, which occupied the cecum. The surface was hyperemic and edematous, the center was slightly depressed, with multiple erosions and ulcers. The surface structure was not clearly observed. The tip was about 1.0*1.2cm, hyperemic and red, with erosions on it. The structure of local glands was irregular…	l	Adenocarcinoma									20	4	yes
405	female	87	1035579		2018-03-14 12:35:00	Never smoked	Never drank alcohol	no	no	4.57	1.54	2.41	no	no	no		155	54			Never used before.	hematochezia			Colonoscopy (general)	Rectum - cancer?	Endoscopy room 6	Rectal cancer	Examination	(Rectal) tubular adenocarcinoma pending immunohistochemistry	A mass was seen in the rectum, The outer edge of the tumor was about 8cm from the anal opening. The surface of the tumor was red and rough, showing no structure, easy to bleed when touched. The local intestinal cavity was slightly narrow, and the endoscope could not pass through	Rectum	Adenocarcinoma									Failure	Data missing	Intestinal obstruction
406	male	87	1031215		2017-12-13 11:08:00	Never smoked	Never drank alcohol	no	have				have	have	no		170	60			Currently taking	hematochezia			Colonoscopy (general)	Rectal cancer	Endoscopy room 8	Rectal cancer	Examination	(rectal) tubular adenocarcinoma	Into the sigmoidoscopy knife, as the patient was not receiving further A mass occupying half of the intestinal lumen was found 5cm away from the anus. The surface was ulcerated, the base was old bleeding, the surrounding nodules were uneven, the colon was easy to bleed	Rectum	Adenocarcinoma									Failure	Data missing	The patient cannot tolerate.
407	male	87	1019536		2017-04-17 12:43:00	Has quit smoking	Has stopped drinking	no	no	3.16	0.59	1.01	have	have	no		172	60		III	Used intermittently	hematochezia			Colonoscopy (general)	Colonic erosions and ulceration_X000D_ Ischemic colitis? Melanosis coli Colonic polyps	Endoscopy room 10		Examination	(Rectus B junction) chronic inflammation of the colonic mucosa with pigmentation of the mucosal layer, consistent with melanosis	The transverse colon and descending colon were unblocked, and the mucous membrane was changed like a panton-spot, multiple polyps, Yamada type I-II, 0.5-0.8cm in size. The sigmoid colon showed high degree of mucosal swelling, submucosal hemorrhage, sheet erosion and ulcer. There was no abnormality in the rectum, which was well circumscribed with the normal mucosa	Descending colon	Chronic mucositis									Failure	Data missing	Poor bowel preparation prevented completion.
408	female	87		125065335	2020-10-12 08:33:00	Never smoked	Are drinking alcohol	no	no	4.68	0.52	2.06	no	have	no	6.8	150	60		III	Never used before.	hematochezia			Colonoscopy (painless)	Rectal cancer with local stenosis High probability of malignancy	Endoscopy room 1	Tubular adenocarcinoma, moderate	Examination	(Rectal) tubular adenocarcinoma, intermediate	A circumferential mass was found 10cm from the anus, with red and rough surface covered with filth and blood vessels. It was easy to touch and bleed. Local intestinal stiffness, disappearance of peristalsis, and narrow intestinal lumen were observed	Rectum	Adenocarcinoma									Failure	Data missing	Intestinal obstruction
409	male	87		1110680	2022-02-18 15:31:00	Never smoked	Never drank alcohol	no	no	2.93	1.19	1.64	have	no	no		170	70			Never used before.	Change in bowel habits			Colonoscopy (general)	The nature of multiple colonic ulcers remains to be confirmed by pathology Ischemia? Infection? Colonic polyp, to be treated Melanosis coli Poor bowel cleanliness	Endoscopy room 1		Examination	no	Lens entry time: 11BBPS: LC:1+TC:2+RC:2= 5. There were more fecal water and fecal residue in the intestinal cavity, which affected the observation The ileocecal valve was lip-shaped. There were multiple ulcers on the surface, irregular in shape, covered with white moss, irregular in shape, confluent in part, clear in boundary, and slightly edematous in surrounding mucosa. Multiple ulcers were fou…											11	5	yes
410	male	87		124102652	2021-03-25 11:31:00	Has quit smoking	Has stopped drinking	no	no	4.04	1.16	2.1	no	no	no	6.1	165	66		III	Never used before.	Change in bowel habits			Colonoscopy (painless)	Multiple polyps in the colon, pending pathology Rectal cancer,	Endoscopy room 3		Examination	Rectum: tubular adenoma, rectum: adenocarcinoma	Entry time: 3 Intestinal cleanliness grade 2 The ileocecal valve was lip-shaped, and the opening of the appendix was clear. There was no erosion and ulceration or new growth. An Isp polyp was found in the ascending colon, with a size of 0.8*0.9cm and a smooth surface, and a type IIIl glandular opening. A 0.5-0.8cm, white, smooth surface, 0.6*0.8cm from the anus, smooth surface, type IIIl opening,…	Ascending colon		Rectum	Tubular adenoma		Rectum	Adenocarcinoma				3	2	yes
411	female	87 years and 18 days		118977053	2022-04-18 14:49:00	Never smoked	Never drank alcohol	no		3.94	0.67	1.71	have	no	no		163	65		II	Never used before.	abdominal mass			Colonoscopy (painless)	No abnormalities were found in the whole colonic mucosa	Endoscopy room 1	No abnormalities seen	Examination	no	Lens entry time: 9BBPS: LC:2+TC:2+RC:2= 6 The ileocecal flap was lip-shaped, the opening of the appendix was clear, and no erosion or ulcer or neoplasm was observed. The colonic mucosa was smooth, the vascular texture was clear, and the plica of semilunaris was intact, and no erosion, ulcer or neoplasm was observed											9	6	yes
412	female	May at 87	1124766		2022-11-17 16:19:00	Never smoked	Never drank alcohol	no	have	4.94	1.64	3.35	have	have	have		150	55			Currently taking	anemia		Survival	Colonoscopy (painless)	Multiple polyps in the colon Melanosis of colon Poor bowel cleanliness	Endoscopy Room 2	Colonic polyps, melanosis	Examination	Terminal ileum: chronic inflammation of the small intestinal mucosa, rectum: chronic inflammation of the mucosa, melanosis	Entry time: 4BBPS: LC:2+TC:2+RC:2= 6, influence observation The ileocecal valve was lip-shaped, the opening of the appendix was not occluded, and a large amount of fecal water was found in the intestinal cavity. Two IS-type polyps (0.3-0.4cm in size) were found near the hepatic flexure of the ascending colon, with white and smooth surface. No erosion, ulcer or neoplasm was found	Hepatic flexure	Chronic mucositis									4	6	yes
413	male	May at 87		1001234306	2022-04-08 14:36:00								no	no	no		170	66		III		hematochezia			Colonoscopy (painless)	Multiple colorectal polyps, forceps removal Melanosis of the colon	Endoscopy Room 4		Examination	(transverse colon) tubular adenoma, low-grade melanosis (transverse colon) melanosis (Descending colon) tubular adenoma, low-grade melanosis Hyperplastic polyp (rectum)	Insertion time: 15BBPS: LC:2+TC:2+RC:2= 6 Solid feces were scattered in the intestinal cavity, which covered the mucosa and slightly affected the observation of the ileocecal valve. The opening of the appendix was clear. Two polyps were seen in the transverse colon, two in the descending colon, and one IS-type polyp was seen in the rectum. The colon mucosa was smooth and soft. Diffuse dark brown …	cross	Tubular adenoma	Descending colon	Tubular adenoma	Rectum	Hyperplastic polyps					15	6	yes
414	male	Aged 87 in June	1139147		2023-07-25 13:44:00	Smoking now	Are drinking alcohol	no		4.96	0.89	3.49	have	no	no	5.7	166	62		IV	Currently taking	Abdominal pain or distension	No complications	Survival	Colonoscopy (painless)	Colon polyps Cold snare resection (CSP 1 piece) Melanosis of the colon	Endoscopy Room 2	Colonic polyps, melanosis	Treatment (EMR)	Chronic inflammation of the mucosa of the large intestine (sigmoid colon) with phagocytotic pigmentation by macrophages in the lamina propria	Entry time: 7BBPS: LC:1+TC:2+RC:1=4 Two Is polyps, about 0.8cm and 0.3cm in size, were found in the sigmoid colon about 20cm from the anus. The surface was smooth, the color was the same as the surrounding, and there was no erosion. Do not use snare ligation and cold resection. The 0.3cm polyp could not be removed due to more fecal water in the intestine, and there was more fecal water and formed…	Two polyps in sigmoid colon	Chronic mucositis									7	4	yes
415	male	87 in July		101680686	2023-10-27 09:08:00	Never smoked	Never drank alcohol	no	have	4.35	1.09	2.39	have	have	no		170	65			Never used before.	anemia			Colonoscopy (general)	Poor bowel preparation Melanosis of the colon Colonic telangiectasia?	Endoscopy room 6	Melanosis of the colon	Examination	no	Time of entering the endoscope: 4 BBPS: LC:2+TC:2+RC:1= 5 fecal fluid in the intestinal cavity, visible solid feces, affecting observation No abnormal ileocecal valves were lip-shaped, the opening of the appendix was clear, and no erosion or ulcer or new growth was observed. The colonic mucosa was smooth, tapped-like changes, clear vascular texture, diffuse vascular pseudopod-like changes in the …											4	5	yes
416	male	87 in September		100857709	2024-05-31 08:28:00	Has quit smoking	Are drinking alcohol	no	have	2.64	0.51	1.18	have	no	no		167	58.5			Used intermittently	Change in bowel habits	No complications	Survival	Colonoscopy (general)	No abnormalities were found in the colonic mucosa Rectal erythema	Endoscopy room 7	No abnormalities seen	Examination	no	Entry time: 3 BBPS: LC:2+TC:2+RC:2= 6 There was no obvious abnormality in the terminal ileum. The ileocecal valve was lip-shaped, the opening of the appendix was clear, and no erosion or ulcer or neoplasm was observed. The patient was elderly and had poor compliance											3		yes
417	male	88	1109138		2021-12-29 10:49:00	Never smoked	Never drank alcohol	no		3.91	2.24	2.11	have	no	no	6.4	170	65			Never used before.	Follow-up for history of colon cancer/polyps			Colonoscopy (general)	Multiple polyps in the colon Wait for transurethral resection Postoperative changes of rectum	Endoscopy room 3		Examination	Ascending, liver 1, liver 2, transverse: tubular adenoma	Entry time: 25BBPS: LC:2+TC:2+RC:3= 7 The ileocecal flap was lip-shaped, the opening of the appendix was clear, and no erosion and ulcer or new growth was observed. Two adjacent polyps were observed near the hepatic flexure, one was 0.8cm in size and the other was 0.7cm, both of which were Isp type. The surface mucosa was smooth and the color was the same. The rest of the colonic mucosa was smoot…	Four polyps were found	Tubular adenoma									25	BBPS7	yes
418	male	88	1087461		2020-10-29 08:50:00	Has quit smoking	Never drank alcohol	no	have	5.7	0.44	4.21	no	no	no		172	69		III	Never used before.	Abdominal pain or distension			Colonoscopy (general)	Multiple polyps in the colon	Endoscopy room 3		Examination	(hepatic flexure) tubulovillous adenoma with superficial tissue	Entry time: 9 Intestinal cleanliness grade 3 The ileocecal valve was lip-shaped, the appendix opening was clear, and no erosion and ulceration or neoplasm were observed. A 1.5*1cmIsp polyp was found in the hepatic flexle of the ascending colon. The surface was smooth and lobulated, and it stretched across the fold and deformed after inspiration. A 0.5*0.6cmIs polyp was found at the descending B j…	Hepatic flexure	Villous tubular adenoma	Descending colon 0.6								9	3	yes
419	female	88	1050675		2018-11-20 12:31:00	Never smoked	Never drank alcohol	no	have	6.61	1.94	4.59	have	no	no	6.1	150	57		II	Never used before.	Positive fecal occult blood			Colonoscopy (painless)	Hepatic flexure carcinoma possible Colonic polyp, cold resection Postoperative colon	Endoscopy Room 2		Examination	(hepatic flexure) tubular adenocarcinoma to be diagnosed by immunohistochemistry Immunohistochemical results of (hepatic flexure) tubular adenocarcinoma: CK (+), CEA (+), Ki-67 (60%+), P53 (wild type), MLH1 (+), MSH2 (+), MSH6 (+), PMS2 (partial +), Her-2 (-)	Entry time: 3 Intestinal cleanliness grade 3 There was no obvious abnormality in the terminal ileum. The ileocecal valve was lip-shaped, the opening of the appendix was clear, and there was no erosion and ulceration or new growth. There was a circular mass in the hepatic flexure, about 2.5cm in length, occupying about half of the lumen The surface of the tumor was elevated and uneven, easy to ble…	Hepatic flexure	Adenocarcinoma	Hepatic flexure	Adenocarcinoma							3	3	yes
420	female	Aged 88 in March	1131734		2023-04-06 14:41:00	Never smoked	Never drank alcohol	no	have	4.37	1.3	2.53	have	have	no		160	54		II	Currently taking	hematochezia			Colonoscopy (painless)	Cecal polyps Multiple diverticula in the colon Associated bleeding may be large Endoscopic hemostasis	Endoscopy room 3	Colonic polyps, diverticulum bleeding	Examination	Sessile serrated polyp (caecum) with diffuse acute and chronic inflammation, cryptitis	Time to enter the endoscope: 10 BBPS: LC:2+TC:2+RC:2= 6 parts of the intestinal cavity had a lot of fecal water, which affected the observation There was no abnormal ileocecal valve lip-shaped, the appendix opening was clear, no erosion and ulcer was found, and an IStype polyp was seen next to it. The size was 0.4x0.4cm, the surface was slightly rough, and the color was similar to the surrounding…	Cecum 0.4	Sessile serrated lesions were seen									10	6	yes
421	male	Aged 88 in July	1026912		2022-07-06 13:06:00	Never smoked	Never drank alcohol	no	have	4.28	2.64	2.57	have	have	have	6.2	170	76		III	Currently taking	Change in bowel habits			Colonoscopy (painless)	Rectal cancer: Cancer_X000D_ Multiple polyps of the colon Melanosis of colon	Endoscopy room 5	Rectal cancer, Polyps, melanosis	Examination	Metaplastic tubular adenocarcinoma (rectum) Immunohistochemical results: Her-2 (0), MSH6 (+), MSH2 (+), MLH1 (+), PMS2 (+), CK (-)	Insertion time: 15 BBPS: LC:1+TC:2+RC:1= 4 Poor bowel preparation affected the observation of the local mucosa The ileocecal flap was lip-shaped, the opening of the appendix was clear, and there was no erosion and ulceration or neoplasm. There was a 0.8*0.7cmIsp polyp 40cm and 30cm from the anus, respectively. There was a smooth Isp polyp 25cm and 20cm from the anus, about 1.2-1cm in size, with s…	Rectum	Adenocarcinoma	Sigmoid colon	Villous tubular adenoma							#VALUE!	4	yes
422	male	Aged 88 in July	1021643		2024-02-19 14:22:00	Never smoked	Never drank alcohol	no	have	2.1	1.12	1.12	have	have	have	7.5	163	76			Currently taking	hematochezia			Colonoscopy (general)	Multiple ulcers and edema of the colon Ischemic colitis may be Colonic polyps Melanosis coli Poor bowel preparation	ERCP	Ischemic colitis, polyps, melanosis		no	Bedside colonoscopy: A large number of formed feces were found in the intestine, and the endoscopic examination could not be continued. The mucosa of the transverse colon was smooth, and there was an IS-type polyp, about 50cm from the anus, with a size of about 0.5x0.6cm. Surface erythema, lesions along the side of the colon continuous spread, descending colon ulcer surrounding mucosal congestion…											Failure	Data missing	Poor bowel preparation prevented completion.
423	female	Aged 88 in August	1158758		2024-04-19 13:32:00	Never smoked	Never drank alcohol		no	3.31	1.05	1.62	have	have	no		150	50			Never used before.	Change in bowel habits	No complications	Survival	Colonoscopy (general)	Multiple diverticular colon polyps in the terminal ileum Multiple diverticula in the colon Multiple erythematous patches of the colon Vascular malformations may Rectal varices	Endoscopy Room 2	Colon diverticula 111	Examination	Ascending colon: Tubular adenoma	Entry time: 5BBPS: LC:2+TC:3+RC:2=7 There were 2 small diverticula, 0.2-0.3cm in size, lip shaped ileocecal valve, clear appendix opening, multiple diverticula in cecum and sigmoid colon, especially in ascending colon and sigmoid colon, 0.3-1.0cm in size. There were 35 diverticula from descending colon to anus, and small fecal mass impacted. In the ascending colon, two erythematous spots (2-3cm i…	The ascending colon was 0.4cm	Tubular adenoma									5	7	yes
424	male	Aged 88 in August	1127596		2023-02-02 12:04:00	Smoking now	Never drank alcohol	no	no	4.8	1.39	2.81	have	no	no	5.5	170	49		III	Never used before.	anemia	No complications		Colonoscopy (painless)	Colon cancer of undetermined nature with stricture Multiple polyps in the colon	Endoscopy Room 2	Colon cancer, polyps	Examination	Hepatic flexure: moderately or poorly differentiated carcinoma, transverse colon: tubular adenoma	Entry time: 22BBPS: LC:1+TC:2+RC:1=4, observe the affected The hook-pull method was used to enter the scope 70cm through the cavity to the hepatic flexure colon. There was a circumferential raised mass 70cm from the anus, the intestinal cavity was narrow, the endoscope could not pass through, the surface structure of the mass was unclear, the blood vessels were peeled, the surface was erosive, th…	Hepatic flexure	Adenocarcinoma	Transverse colon 0.5	Tubular adenoma							22	4	Intestinal obstruction
425	male	89	1092012		2021-03-08 11:29:00	Never smoked	Never drank alcohol	no	no	2.63	1.4	1.. 58	no	no	no		165	73			Never used before.	Change in bowel habits	No complications		Colonoscopy (general)	Rectal stenosis cancer	Endoscopy room 5		Examination	Tubular adenocarcinoma	Intestinal stenosis was found 10cm from the anal verge of the rectum, and the endoscopy failed to pass through the stenosis of mucosal nodules like uneven, easy to bleed on contact. Three biopsy pieces were fragile, easy to bleed after local spraying of norepinephrine saline, and no active bleeding was observed	Rectum	Adenocarcinoma									Failure	Data missing	Intestinal obstruction
426	female	89	1029336		2017-11-15 13:54:00	Never smoked	Never drank alcohol	no	have	6.01	1.3	4.03	have	have	no		155	68			Never used before.	anemia			Colonoscopy (general)	Rectal cancer Possible Colonic polyps	General preparation room	Tubular adenocarcinoma	Examination	Tubular adenocarcinoma	The patient's bowel preparation was poor, and a total of 15cm was taken A 1.5cm Yata type III polyp was found 15cm from the anus, and the mucosa on the surface of the polyp was red. A rectal mass was found 10-14cm into the scope, occupying 2/3 of the rectum. The mass was nodular around the mass, the central depression of the mass, a small amount of white moss, crispness, and easy to bleed	Rectum	Adenocarcinoma	Straight b border 1.5 cm								Failure	Data missing	Poor bowel preparation prevented completion.
427	male	89	1024696		2017-08-04 10:09:00	Has quit smoking	Are drinking alcohol	no	no	1.82	1.13	0.96	no	no	no		178	62			Never used before.	hematochezia			Colonoscopy (general)	Colon polyps, adenoma may Rectal cancer	Endoscopy room 8	Rectal cancer	Examination	1 (25cm from anus) tubulovillous adenoma; 2 (rectal) tubular adenocarcinoma	Entry time: 5 Intestinal cleanliness grade 4 A 1.5cm Yata type IV mass was found 25cm from the anus. The surface mucosa was red, leaf shaped, and white spots were seen at the root. Biopsy of two masses ranged from 5 to 10cm from the anus, occupying 2/3 of the intestinal lumen, with irregular surface shape, erosion in the center, red erosion on the surface, and crissum. The surrounding mucosa was …	Sigmoid colon	Villous tubular adenoma	Rectum	Adenocarcinoma							5	4	yes
428	male	89	1012970		2016-10-28 13:51:00	Never smoked	Never drank alcohol	no	have	4.19	0.74	2.36	have	have	no	5.8	172	63		III	Never used before.	Abdominal pain or distension			Colonoscopy (general)	Colon cancer Multiple polyps in the colon	Endoscopy room 7		Examination	(Ascending colon) tubular adenocarcinoma, immunohistochemical staining showed Ki-67,P53,MLH1, MSH2, MSH6, and PMS2	Time of endoscopy entry: 7 Intestinal cleanliness was grade 3, and a large amount of fecal water in the intestinal cavity affected observation A cauliflower-like mass, about 5x6cm in size, with central depression, hyperemia, erosion on the surface, covered with fouling, with clear boundary, occupying nearly 1/2 weeks of the lumen, was observed in the contralateral ascending colon. The endoscope c…	l	Adenocarcinoma	Three polyps were found								7	3	yes
429	male	89	1007540		2017-05-26 12:13:00	Never smoked	Never drank alcohol	no	no	3.83	0.67	2.06	have	no	no		166	62			Never used before.	anemia			Colonoscopy (general)	Ascending colon cancer possible	Endoscopy room 8		Examination	(Ascending colon) tubular adenocarcinoma	Entry time: 15 Intestinal cleanliness grade 2 The ileocecal flap was lip-shaped, the opening of the appendix was clear, and no erosion or ulcer or new growth was observed. A circumferential mass of about 5cm in length was seen in the ascending colon. The surface of the mass was hyperemia, erosion and ulcer, and the surrounding ring wall was raised. No erosion, ulcer or neoplasm was observed	l	Adenocarcinoma									15	2	yes
430	male	89		1102804	2021-09-17 16:01:00					3.35	1.18	1.66	have	no	no			75			Currently taking	hematochezia			Colonoscopy (general)	Inflammation of the left colon Ischemia is possible Infection must be ruled out	Endoscopy Room 2		Examination	no	The transverse colon mucosa was smooth, and yellow intestinal contents were seen in the intestinal cavity. The descending colon and sigmoid colon mucosa were diffuse congestion and rough, and the submucosal blood congestion spots were found. The lesions were mainly located at the descending B junction, and large longitudinal erosions were seen. The vascular texture was not clear and granular. Two…											Failure	Data missing	Poor bowel preparation prevented completion.
431	male	89 in November	1112576		2022-03-31 11:32:00	Smoking now	Never drank alcohol	no	have	4.03	0.5	2.51	have	have	no	5.7	170	54		III	Currently taking	hematochezia			Colonoscopy (painless)	Colon with stenotic carcinoma Malignant possibility Multiple polyps in the colon	Endoscopy room 1		Examination	(Rectus B junction) high grade intraepithelial neoplasia (intramucosal cancer), can not exclude more serious lesions, please combine with clinical practice	The rectal cavity was narrow, and the endoscope could not pass through. The surface of the mass was red and erosive, the mucosa was fragile and spontaneously bleeding. The biopsy was tough and elastic	Straight B junction	Intramucosal carcinoma									Failure	Data missing	Intestinal obstruction
432	female	89 in January	1154186		2024-02-23 10:32:00	Has quit smoking	Never drank alcohol	no		4.84	2.11	2.87	no	have	no		156	48			Never used before.	Change in bowel habits	No complications	Survival	Colonoscopy (general)	Anorectal cancer It may be malignant Multiple colonic polyps (LST1) To be treated	Endoscopy Room 2	Malignancy	Examination	(Rectal) tubular serrated adenoma, GII, Focal GIII(superficial tissue, please make a comprehensive judgment)	Insertion time: 7BBPS: LC:2+TC:2+RC:3=7 The ileocecal valve was lip-shaped, and the opening of the appendix was clear. There was a LST (1.0*1.4cm) in the transverse colon near the hepatic flexle, with a villous surface and the same color around it. There was a 3*3.5cm mass with rough erosive surface, villous, irregular structure, covered with mucus, and easy bleeding on contact. The anal canal an…	Transverse colon, 1.4cm		5 for the whole colon		Rectum	High-grade intraepithelial neoplasia					7	7	yes
433	male	89 in January		102162922	2022-09-01 10:49:00	Has quit smoking	Has stopped drinking			3.13	0.66	1.7	have	no	no		165	60			Never used before.	Change in bowel habits			Colonoscopy (general)	No abnormality was found in the colonic mucosa Poor bowel preparation	Endoscopy room 6	No abnormalities seen	Examination	no	Lens entry time: 6BBPS: LC:1+TC:2+RC:1= 4 There were many solid feces in the intestinal cavity, which covered the mucosa. The ileocecal valve was lip-shaped. The opening of the appendix was clear, and the colonic mucosa was smooth, the vascular texture was clear, and the plica of semilunar was intact											6	4	yes
434	male	Aged 89 in July		124766165	2024-06-18 09:24:00	Smoking now	Has stopped drinking	no	no	4.41	2.08	2.92	have	have	no		182	80		III	Currently taking	hematochezia	No complications	Survival	Colonoscopy (general)	Multiple erosions of the colon Infection? UC? Multiple polyps in the colon	Endoscopy room 7	Colon infection	Examination	Ascending: focal chronic active inflammation with erosion of the mucosa of the large intestine, visible cryptitis; Descending straight: focal chronic active inflammation with erosion of the mucosa of the large intestine, visible cryptitis and crypt abscess; infectious lesions were excluded first.	Entry time: 13 BBPS: LC:3+TC:2+RC:2= 7 The ileocecal valve was lip-shaped and no abnormality was found in the terminal ileum. The mucosal vascular texture of the appendix was blurred, with scattered punctate erosions. There were several scattered patches of mucosal congestion and erosions of 1-3cm in size in the ascending colon, one of which showed a soft 0.7cmIs polyp without spontaneous bleedin…											#VALUE!		yes
435	male	90	1016529		2016-03-11 11:24:00	Never smoked	Never drank alcohol	no	no	4.82	0.7	2.55	no	no	no	6	160	65		III	Never used before.	Follow-up for history of colon cancer/polyps			Colonoscopy (general)	After colectomy Colonic polyps, forceps clear Biopsy :[1] 1 block of ascending colon; [2] 2 pieces of transverse colon;	Endoscopy room 1			Hepatic flexure: tubular adenoma; Hepatic flexure: tubular adenoma, hepatic flexure: chronic mucosal inflammation; Splenic flexure: chronic mucosal inflammation	Digital anal examination was negative The endoscope was inserted 70cm through the cavity to the end of the ileum by hook method. The ileocecal valve was lip-shaped, the opening of the appendix was clear, and a polyp was found in the ascending colon. Yamada type I polyp was found in the transverse colon. The mucosa was smooth and no abnormality was found in the rectum	Hepatic flexure	Tubular adenoma	Hepatic flexure	Tubular adenoma							Data missing	Data missing	yes
436	female	90	1000984		2018-07-06 12:39:00	Never smoked	Never drank alcohol	no	have	2.64	0.66	1.73	have	have	have		157	46		III	Currently taking	Change in bowel habits			Colonoscopy (general)	Colon mass Cancer may be Stricture of the colon	Endoscopy room 5	Colon cancer T4N0M0	Examination	Tubular adenoma (sigmoid colon), grade 3	Bowel cleanliness grade 5 Stool was found in the rectum and sigmoid colon. The mass was found 18cm from the sigmoid colon to the anus, with irregular surface shape and uneven surrounding mucosa, occupying the whole circumference of the intestinal cavity. The lumen was narrow, and the gap could not be seen	Sigmoid colon	Adenocarcinoma									Failure	5	Intestinal obstruction
437	female	Age 90 in March		1132726	2023-04-19 13:41:00				have	3.49	0.69	1.96	have	have	have			45			Used intermittently	hematochezia			Colonoscopy (general)	Poor bowel preparation Melanosis of the colon Anal papilla hyperplasia	Endoscopy room 1	Melanosis	Examination	no	20cm into the endoscope, a large amount of black stool formed in the intestinal cavity, and could not continue to enter the endoscope. The colon mucosa was found to be light brown, and no ulcer, mass, or active bleeding foci were found											Failure	Data missing
438	female	Aged 90 in May	1102051		2023-03-03 14:38:00	Never smoked	Never drank alcohol	no	no	2.4	0.85	1.35	have	no	have	6.6	160	80		III	Never used before.	Abdominal pain or distension			Colonoscopy (general)	Poor bowel preparation	Endoscopy Room 2	Poor bowel preparation	Examination	Specimens of partial ileum, colon and ileocecum: 1 (ileocecum) low grade adenocarcinoma, the tumor size was about 4*3.5*3.5cm, tumor embolus in blood vessels and nerve invasion were observed, and the remaining intestinal mucosa showed chronic inflammatory changes. 2 (upper and lower) resection margin and circumferential resection margin were not invaded by cancer, (anastomotic) resection margin w…	A large amount of mushy stool was seen in the lumen starting from the sigmoid colon and continuing to 60cm (middle transverse colon?). A large number of formed stools blocked the intestinal lumen and could not continue to enter the scope. No obvious ulcer or mass was found in the colon	Ascending colon	Adenocarcinoma									Failure	Data missing	Poor bowel preparation prevented completion.
439	male	90 years old in July	1125188		2022-11-22 13:46:00	Never smoked	Never drank alcohol	no	have	4.35	2.27	2.34	have	have	no		174	60		III	Currently taking	hematochezia	No complications	Survival	Colonoscopy (painless)	Transverse colon polyp, to be resected Multiple diverticula in sigmoid colon	Endoscopy room 3	Colonic polyps, diverticula	Examination	no	Insertion time: 7BBPS: LC:1+TC:3+RC:2= 6 No obvious abnormalities were found in the terminal ileum. The ileocecal valve was lip-shaped, the opening of the appendix was clear, no erosion and ulceration were found, and no new growth was observed. Multiple diverticula were found in the sigmoid colon, with an opening size of 0.3-1.0cm and a smooth inner wall. The rest of the colon showed smooth mucos…	The transverse colon was 1cm	Tubular adenoma									7	6	yes
440	male	90 years old in July	1120625		2022-08-30 13:30:00	Never smoked	Never drank alcohol	no		2.98	1.94	1.81	no	no	no		165	50		II	Never used before.	Follow-up for history of colon cancer/polyps	No complications	Survival	Colonoscopy (general)	Multiple rectal carcinomas with strictures - consistent with malignancy Postoperative changes of rectum	Endoscopy room 5	Rectal cancer	Examination	(18cm rectum) tubular adenocarcinoma (5cm rectum) a tubular villous adenoma in the superficial mucosa	A circumferential mass was found at 18cm of the rectum, which was covered with dirty secretions, spontaneously bleeding, local intestinal stenosis, and the biopsy texture was fragile. Another anastomosis was found at 7cm of the rectum, and a raised mass with a diameter of 2.5cm was found at 5cm of the anal side from the anus	Rectum	Adenocarcinoma	Rectum	Tubulovillous adenoma							Failure	Data missing	Intestinal obstruction
441	female	90 in August	1152675		2024-01-25 09:46:00	Never smoked	Never drank alcohol	no		5.19	1.97	3.35	no	no	no		155	66.5		III		hematochezia			Colonoscopy (general)	Straight B junction Cancer possible	Endoscopy room 1	Colon cancer	Examination	Direct B junction: adenocarcinoma, moderate, no special type	The rectal mucosa was smooth, and no abnormality was found. The nodule like mass was found at 3/4 circumference, 16-22cm from the anus, with rough surface and congestion, spontaneous bleeding, unclear boundary, narrow intestinal lumen, and white spot in the surrounding mucosa	The rectal mucosa was smooth and no abnormality was found	Adenocarcinoma									Failure	Data missing	Intestinal obstruction
442	male	91 years, 11 days		2379437	2023-10-20 09:23:00								no	no	no						Never used before.	Follow-up for history of colon cancer/polyps			Colonoscopy (general)	The mucosa of the terminal ileum was rough, pending pathology Multiple polyps of the colon Four were removed by forceps The rest was excised Sigmoid colon cancer, pending pathology Multiple polypoid protuberations of rectum NET?	Endoscopy room 6	Colon cancer, colon polyps	Examination	Terminal ileum: Lymphoid tissue hyperplasia of the intestinal mucosa, ascending, transverse, and: tubular adenoma. Sigmoid colon: high-grade tubular adenoma.	Entry time: 6BBPS: LC:2+TC:3+RC:3= 8 Biopsy *2, the ileocecal valve was lip-shaped, the opening of the appendix was clear, an IS-type polyp (1.2*1.2cm, smooth surface) was found at the beginning of the ascending colon, and an ISP-type polyp was found in the transverse colon. The size of the polyp was 1.2*1.2cm, the surface was smooth, and the opening of the IIIl gland was found. 1.0*1.0cm, smooth…	l	Tubular adenoma	cross	Tubular adenoma	Sigmoid colon	High-grade intraepithelial neoplasia					6	8	yes
443	female	91 in November	1119467		2022-08-16 13:38:00	Never smoked	Never drank alcohol	no	no	2.84	0.41	1.61	no	no	no		165	43.2		III	Never used before.	Abdominal pain or distension	No complications	Death	Colonoscopy (painless)	Ascending colon cancer Ascending colon bulge, SMT? Multiple colorectal polyps Poor bowel preparation	Operating room	Colon cancer (stage IV)	Examination	(Ascending colon) low grade carcinoma, combined with immunohistochemical results consistent with low grade adenocarcinoma Immunohistochemical results: Her-2 (0), MSH6 (+), MSH2 (+), MLH1 (+), PMS2 (+), P53 (mutant), Ki-67 (about 80%+), CK (+), CDX-2 (partially +), SATB2 (-), Muc-1 (+), MUC-2 (partially +), MUC-6 (-), PAX8(-)	Lens entry time: 9 BBPS: LC:1+TC:2+RC:1= 4 There was a large amount of fecal water in the intestinal cavity, covering the mucosa, which affected the observation of the ascending colon. There was a raised proliferative mass, which almost blocked the intestinal cavity. Multiple ulcers, erosion, and stasis of blood vessels were observed on the blocked surface of the endoscope, spontaneous bleeding w…	Ascending colon	Adenocarcinoma	Multiple polyps in the left colon								9	4	Intestinal obstruction
444	male	91 in May	1028199		2023-12-13 17:30:00	Has quit smoking	Are drinking alcohol	no	no	4.04	0.56	2.66	no	no	no		160	50		III	Never used before.	Change in bowel habits			Colonoscopy (painless)	Colon cancer Stricture of the colon Colonic stent placement via electronic endoscopy under DSA	ERCP	Colon cancer	Treatment (Stent placement)	Well-differentiated adenocarcinoma	The electronic colonoscopy was inserted from the anus, followed by the intestinal lubrication. A circumferential raised mass was found about 30cm from the anus to the sigmoid junction. The surface mucosal structure disappeared, the surface was erosive, brittle, easy to bleed, the lumen was narrow, the endoscope could not pass through, the biopsy was brittle, and there was a small amount of bleedi…	Descending B junction	Adenocarcinoma									Failure	Data missing	Intestinal obstruction
445	female	92	1048356		2018-10-17 14:59:00	Never smoked	Never drank alcohol	no	no	2.83	1.18	1.46	no	no	no		155	45			Never used before.	abdominal mass			Colonoscopy (general)	Ascending col-cecum bulge, ulcer nature to be determined Diffuse large B-cell lymphoma?	Endoscopy room 3		Treatment (hemostasis)	(ascending colon) malignant tumor, inclined to diffuse large B cell lymphoma to be diagnosed by immunohistochemistry Malignant tumor of the ascending colon, combined with immunohistochemistry, was consistent with diffuse large B-cell lymphoma of germinal center origin (Hans model) Immunohistochemical results: CK (-), Vim (+), LCA (+), CD3 (scattered +), CD20 (+), CD5 (scattered +), CyclinD1 (-), …	Lens entry time: 8 intestinal clearance Cleanliness grade 3 The scope was successfully inserted into the ascending colon through the cavity, and a circumferential ulcer was seen near the hepatic flexure, involving 4/5 weeks, and the distal end involved the cecum ring. The ulcer was covered with dirty moss, the bottom was uneven, the periphery was raised and uneven, and microvascular stasis was ob…	l	Diffuse large B lymphoma									8	3	Intestinal obstruction
446	female	93		115336236	2018-03-20 15:20:00	Has quit smoking	Are drinking alcohol	no		4.69	1.67	2.84	no	no	no						Never used before.	hematochezia			Colonoscopy (general)	Colon polyps Poor bowel cleanliness	Endoscopy room 5		Examination	Died 2 months after colonoscopy	Entry time: 5 Bowel cleanliness Grade 4 An Isp polyp, 1.0*0.8cm in size, with smooth surface was found 18cm from the anus to the rectosigmoid junction. The glandular orifice type IIIl was found in the rest of the colon with smooth mucosa, clear vascular texture, intact semilunar fold, and no erosion, ulcer, or neoplasm	1cm straight B junction										5	4	Poor bowel preparation prevented completion.
447	male	95 in April	1112959		2024-04-19 10:32:00	Has quit smoking	Has stopped drinking	no	no	3.47	1.02	2.21	have	have	no		162	67		IV	Used intermittently	Positive fecal occult blood	No complications		Colonoscopy (general)	The nature of the bulge in the descending colon is unknown Cancer? Multiple diverticula in the colon Multiple polyps of the colon Forceps clear 1	Endoscopy Room 4	Colon cancer	Examination	(Ascending colon) hyperplastic polyp with interstitial lymphocyte aggregation_X000D_ (Descending colon) tubular adenocarcinoma, metaplasia Immunohistochemical results: -2: Her-2 (1+), MSH6 (+), MSH2 (+), MLH1 (+), PMS2 (+), P53 (1+), Ki-67 (90%+), CK20 (+)	Insertion time: 12BBPS: LC:3+TC:2+RC:2=7 Multiple diverticula were found in the whole colon, with smooth bottom or stool. A mass of about 3cm in length was seen in the descending colon, with irregular surface shape, uneven nodule, clear boundary, occupying nearly the whole intestinal lumen, and narrow lumen, and the endoscope could pass through. There was a NICE type II polyp, mainly JNET type II…	l	Hyperplastic polyps	Descending colon	Adenocarcinoma	Transverse 1.7cm	Tubular adenoma	Sigmoid colon 0.8 cm				12	7	yes
